# Supplementary material for: Gliosarcoma vs. glioblastoma: a retrospective case series using molecular profiling
Source: BMC Neurol. 2021 Jun 23;21:231. doi: 10.1186/s12883-021-02233-5 (PMC8220715; doi:10.1186/s12883-021-02233-5)
Supplement: Supplementary file 1 — Additional file 1 This is a spreadsheet in the Excel file format. It contains the following worksheets: title-page. The title of the manuscript and the author list. data1. The data-set used for analysis. key1. The key to data1 above. This file can be opened with any common spreadsheet software e.g. LibreOffice, Excel. [file 12883_2021_2233_MOESM1_ESM.xlsx]

## Sheet: title-page
Title	Gliosarcoma vs. Glioblastoma: A retrospective case series using molecular profiling
Authors	Christopher Dardis , David Donner, Nader Sanai, Joanne Xiu, Sandeep Mittal, Sharon K. Michelhaugh, Manjari Pandey, Santosh Kesari, Amy B. Heimberger, Zoran Gatalica, Michael W. Korn, Ashley L. Sumrall and Surasak Phuphanich

## Sheet: data1
id	deId	year	inst	state	age	ageR	gen	s1	s2	s3	lat	gs	lin	rec	nec	bx	od	hem	gc	ep	gem	sc	te	fib	pOF	tmb	htmb	msi	cMET-ci	EGFR-ci	Her2-ci	MDM2-ci	TOP2A-ci	43352-c	ABL2-c	ACSL3-c	ACSL6-c	ADGRA2-c	AFDN-c	AFF1-c	AFF3-c	AFF4-c	AKAP9-c	AKT2-c	AKT3-c	ALDH2-c	ALK-c	APC-c	ARFRP1-c
1	DE-0071420	2012	jef	pa	57	58	m	l	f	NaN	l	1	gb	0	0	0	0	0	0	0	0	0	0	0	NaN	NA	NA	NA	NA	NA	0	NA	NA	NA	NA	NA	NA	NA	NA	NA	NA	NA	NA	NA	NA	NA	NA	NA	NA
2	DE-0077445	2012	ucsd	ca	60	62	m	l	f	NaN	r	0	gb	0	0	0	0	0	0	0	0	0	0	0	NaN	NA	NA	NA	NA	NA	NA	NA	NA	NA	NA	NA	NA	NA	NA	NA	NA	NA	NA	NA	NA	NA	NA	NA	NA
3	DE-0077920	2013	scr	ca	59	59	f	l	f	NaN	r	0	gb	0	0	0	0	0	0	0	0	0	0	0	NaN	NA	NA	NA	0	NA	0	NA	NA	NA	NA	NA	NA	NA	NA	NA	NA	NA	NA	NA	NA	NA	NA	NA	NA
4	DE-0077921	2013	ucsd	ca	59	59	f	l	t	NaN	l	0	gb	0	0	0	0	0	0	0	0	0	0	0	NaN	NA	NA	NA	NA	NA	NA	NA	NA	NA	NA	NA	NA	NA	NA	NA	NA	NA	NA	NA	NA	NA	NA	NA	NA
5	DE-0078014	2012	irv	ca	50	51	m	ST	ST	NaN	NA	0	gb	0	0	0	0	0	0	0	0	0	0	0	NaN	NA	NA	NA	NA	NA	NA	NA	NA	NA	NA	NA	NA	NA	NA	NA	NA	NA	NA	NA	NA	NA	NA	NA	NA
6	DE-0078277	2010	sjh	az	60	60	m	ST	TH	NaN	c	0	gb	0	0	1	0	0	0	0	0	0	0	0	NaN	NA	NA	NA	0	NA	0	NA	NA	NA	NA	NA	NA	NA	NA	NA	NA	NA	NA	NA	NA	NA	NA	NA	NA
7	DE-0078448	2012	jef	pa	67	68	m	l	f	NaN	r	0	gb	0	0	0	0	0	0	0	0	0	0	0	NaN	NA	NA	NA	0	NA	0	NA	NA	NA	NA	NA	NA	NA	NA	NA	NA	NA	NA	NA	NA	NA	NA	NA	NA
8	DE-0078540	2013	bay	tx	61	62	f	l	t	NaN	r	0	gb	0	0	1	0	0	0	0	0	0	0	0	NaN	NA	NA	NA	0	NA	0	NA	NA	NA	NA	NA	NA	NA	NA	NA	NA	NA	NA	NA	NA	NA	NA	NA	NA
9	DE-0078846	2013	prov	wa	77	77	f	ST	ST	NaN	r	0	gb	0	0	0	0	0	0	0	0	0	0	0	NaN	NA	NA	NA	NA	NA	NA	NA	NA	NA	NA	NA	NA	NA	NA	NA	NA	NA	NA	NA	NA	NA	NA	NA	NA
10	DE-0078862	2013	scr	ca	52	52	m	l	f	NaN	l	0	gb	0	0	0	0	0	0	0	0	0	0	0	NaN	NA	NA	NA	0	NA	0	NA	NA	NA	NA	NA	NA	NA	NA	NA	NA	NA	NA	NA	NA	NA	NA	NA	NA
11	DE-0078908	2012	ucsd	ca	52	53	m	ST	TH	NaN	l	0	gb	0	0	0	0	0	0	0	0	0	0	0	NaN	NA	NA	NA	NA	NA	NA	NA	NA	NA	NA	NA	NA	NA	NA	NA	NA	NA	NA	NA	NA	NA	NA	NA	NA
12	DE-0079072	2013	cap	nj	61	61	m	l	t	NaN	r	0	gb	0	0	0	0	0	0	0	0	0	0	0	NaN	NA	NA	NA	0	NA	0	NA	NA	NA	NA	NA	NA	NA	NA	NA	NA	NA	NA	NA	NA	NA	NA	NA	NA
13	DE-0079073	2013	cap	nj	47	47	m	l	f	NaN	r	0	gb	0	0	0	0	0	0	0	0	0	0	0	NaN	NA	NA	NA	0	NA	NA	NA	NA	NA	NA	NA	NA	NA	NA	NA	NA	NA	NA	NA	NA	NA	NA	NA	NA
14	DE-0079075	2013	cap	nj	38	38	m	l	p	NaN	l	0	gb	0	0	0	0	0	0	0	0	0	0	0	NaN	NA	NA	NA	0	NA	0	NA	NA	NA	NA	NA	NA	NA	NA	NA	NA	NA	NA	NA	NA	NA	NA	NA	NA
15	DE-0079077	2013	cap	nj	48	48	f	l	f	NaN	r	0	gb	0	0	0	0	0	0	0	0	0	0	0	NaN	NA	NA	NA	0	NA	0	NA	NA	NA	NA	NA	NA	NA	NA	NA	NA	NA	NA	NA	NA	NA	NA	NA	NA
16	DE-0079083	2013	cap	nj	78	78	m	l	t	NaN	l	0	gb	0	0	0	0	0	0	0	0	0	0	0	NaN	NA	NA	NA	0	NA	0	NA	NA	NA	NA	NA	NA	NA	NA	NA	NA	NA	NA	NA	NA	NA	NA	NA	NA
17	DE-0079089	2013	cap	nj	88	88	m	l	f	NaN	r	0	gb	0	0	1	0	0	0	0	0	0	0	0	NaN	NA	NA	NA	0	NA	0	NA	NA	NA	NA	NA	NA	NA	NA	NA	NA	NA	NA	NA	NA	NA	NA	NA	NA
18	DE-0079092	2013	cap	nj	62	63	f	l	f	NaN	r	0	gb	0	0	0	0	0	0	0	0	0	0	0	NaN	NA	NA	NA	0	NA	0	NA	NA	NA	NA	NA	NA	NA	NA	NA	NA	NA	NA	NA	NA	NA	NA	NA	NA
19	DE-0079093	2013	cap	nj	52	53	f	l	f	NaN	l	0	gb	0	0	0	0	0	0	0	0	0	0	0	NaN	NA	NA	NA	0	NA	0	NA	NA	NA	NA	NA	NA	NA	NA	NA	NA	NA	NA	NA	NA	NA	NA	NA	NA
20	DE-0079095	2013	cap	nj	85	86	m	l	p	NaN	r	0	gb	0	0	0	0	0	0	0	0	0	0	0	NaN	NA	NA	NA	0	NA	0	NA	NA	NA	NA	NA	NA	NA	NA	NA	NA	NA	NA	NA	NA	NA	NA	NA	NA
21	DE-0079134	2013	NA	NA	60	60	f	B	B	NaN	NA	0	gb	0	0	0	0	0	0	0	0	0	0	0	NaN	NA	NA	NA	0	NA	0	NA	NA	NA	NA	NA	NA	NA	NA	NA	NA	NA	NA	NA	NA	NA	NA	NA	NA
22	DE-0079244	2013	cyp	tx	36	36	f	l	t	NaN	r	0	gb	0	0	0	0	0	0	0	0	0	0	0	NaN	NA	NA	NA	0	NA	0	NA	NA	NA	NA	NA	NA	NA	NA	NA	NA	NA	NA	NA	NA	NA	NA	NA	NA
23	DE-0079245	2013	meth	tx	55	55	f	IT	CB	NaN	l	0	gb	0	0	0	0	0	0	0	0	0	0	0	NaN	NA	NA	NA	0	NA	0	NA	NA	NA	NA	NA	NA	NA	NA	NA	NA	NA	NA	NA	NA	NA	NA	NA	NA
24	DE-0079412	2013	west	ny	49	49	f	ST	ST	NaN	NA	0	gb	1	1	0	0	0	0	0	0	0	0	0	NaN	NA	NA	NA	NA	NA	NA	NA	NA	NA	NA	NA	NA	NA	NA	NA	NA	NA	NA	NA	NA	NA	NA	NA	NA
25	DE-0079415	2013	meth	ny	47	47	m	l	t	NaN	l	0	gb	0	0	0	1	0	0	0	0	0	0	0	NaN	NA	NA	NA	0	NA	0	NA	NA	NA	NA	NA	NA	NA	NA	NA	NA	NA	NA	NA	NA	NA	NA	NA	NA
26	DE-0079419	2011	meth	ny	50	52	m	l	p	NaN	l	0	gb	0	0	0	0	0	0	0	0	0	0	0	NaN	NA	NA	NA	0	NA	0	NA	NA	NA	NA	NA	NA	NA	NA	NA	NA	NA	NA	NA	NA	NA	NA	NA	NA
27	DE-0079433	2013	luke	tx	62	63	m	l	tp	NaN	r	0	gb	0	0	0	0	0	0	0	0	0	0	0	NaN	NA	NA	NA	0	NA	0	NA	NA	NA	NA	NA	NA	NA	NA	NA	NA	NA	NA	NA	NA	NA	NA	NA	NA
28	DE-0079434	2013	msl	tx	50	50	f	l	t	NaN	l	0	gb	1	1	0	0	0	0	0	0	0	1	0	NaN	NA	NA	NA	0	NA	0	NA	NA	NA	NA	NA	NA	NA	NA	NA	NA	NA	NA	NA	NA	NA	NA	NA	NA
29	DE-0079435	2012	luke	tx	53	53	f	l	p	NaN	r	0	gb	0	0	0	0	0	0	0	0	0	0	0	NaN	NA	NA	NA	0	NA	0	NA	NA	NA	NA	NA	NA	NA	NA	NA	NA	NA	NA	NA	NA	NA	NA	NA	NA
30	DE-0079437	2013	meth	tx	53	53	f	l	t	NaN	r	0	gb	0	0	0	0	0	0	0	0	0	0	0	NaN	NA	NA	NA	0	NA	0	NA	NA	NA	NA	NA	NA	NA	NA	NA	NA	NA	NA	NA	NA	NA	NA	NA	NA
31	DE-0079438	2013	meth	tx	64	65	f	ml	tpo	NaN	r	0	gb	1	0	0	0	0	0	0	0	0	0	0	NaN	NA	NA	NA	0	NA	0	NA	NA	NA	NA	NA	NA	NA	NA	NA	NA	NA	NA	NA	NA	NA	NA	NA	NA
32	DE-0079495	2013	bay	tx	55	55	m	l	t	NaN	r	0	gb	1	0	0	0	0	0	0	0	0	0	0	NaN	NA	NA	NA	NA	NA	NA	NA	NA	NA	NA	NA	NA	NA	NA	NA	NA	NA	NA	NA	NA	NA	NA	NA	NA
33	DE-0079508	2013	tex	tx	77	78	m	l	f	NaN	r	0	gb	0	0	0	0	0	0	0	0	0	0	0	NaN	NA	NA	NA	0	NA	0	NA	NA	NA	NA	NA	NA	NA	NA	NA	NA	NA	NA	NA	NA	NA	NA	NA	NA
34	DE-0079549	2013	yale	ct	46	46	f	l	p	NaN	r	0	gb	0	0	0	0	0	0	0	0	0	0	0	NaN	NA	NA	NA	0	NA	0	NA	NA	NA	NA	NA	NA	NA	NA	NA	NA	NA	NA	NA	NA	NA	NA	NA	NA
35	DE-0079588	2013	luke	tx	59	59	m	ST	CH	NaN	r	0	gb	0	0	0	0	0	0	0	0	0	0	0	NaN	NA	NA	NA	0	NA	0	NA	NA	NA	NA	NA	NA	NA	NA	NA	NA	NA	NA	NA	NA	NA	NA	NA	NA
36	DE-0079629	NA	NA	NA	47	48	f	l	t	NaN	l	0	gb	0	0	0	0	0	0	0	0	0	0	0	NaN	NA	NA	NA	0	NA	0	NA	NA	NA	NA	NA	NA	NA	NA	NA	NA	NA	NA	NA	NA	NA	NA	NA	NA
37	DE-0079690	2013	meth	tx	63	63	m	l	f	NaN	r	0	gb	0	0	0	0	0	0	0	0	0	0	0	NaN	NA	NA	NA	0	NA	0	NA	NA	NA	NA	NA	NA	NA	NA	NA	NA	NA	NA	NA	NA	NA	NA	NA	NA
38	DE-0079691	2013	meth	tx	70	70	f	l	t	NaN	l	0	gb	0	0	0	0	0	0	0	0	0	0	0	NaN	NA	NA	NA	0	NA	0	NA	NA	NA	NA	NA	NA	NA	NA	NA	NA	NA	NA	NA	NA	NA	NA	NA	NA
39	DE-0079692	2012	meth	tx	27	28	m	l	f	NaN	l	0	gb	0	0	0	0	1	0	0	0	0	0	0	NaN	NA	NA	NA	0	NA	0	NA	NA	NA	NA	NA	NA	NA	NA	NA	NA	NA	NA	NA	NA	NA	NA	NA	NA
40	DE-0079693	2013	luke	tx	54	55	m	l	f	NaN	NA	0	gb	0	0	0	0	0	0	0	0	0	0	0	NaN	NA	NA	NA	0	NA	0	NA	NA	NA	NA	NA	NA	NA	NA	NA	NA	NA	NA	NA	NA	NA	NA	NA	NA
41	DE-0079694	2013	luke	tx	57	57	f	l	o	NaN	NA	0	gb	0	0	0	0	0	0	0	0	0	0	0	NaN	NA	NA	NA	0	NA	0	NA	NA	NA	NA	NA	NA	NA	NA	NA	NA	NA	NA	NA	NA	NA	NA	NA	NA
42	DE-0079695	2012	luke	tx	26	27	f	l	f	NaN	b	0	gb	0	0	0	0	0	0	0	0	0	0	0	NaN	NA	NA	NA	0	NA	0	NA	NA	NA	NA	NA	NA	NA	NA	NA	NA	NA	NA	NA	NA	NA	NA	NA	NA
43	DE-0079699	2013	luke	tx	76	76	m	l	f	NaN	NA	0	gb	0	0	0	0	0	0	0	0	0	0	0	NaN	NA	NA	NA	0	NA	0	NA	NA	NA	NA	NA	NA	NA	NA	NA	NA	NA	NA	NA	NA	NA	NA	NA	NA
44	DE-0079736	2013	ucsd	ca	64	65	m	l	o	NaN	l	0	gb	0	0	0	0	0	0	0	0	0	0	0	NaN	NA	NA	NA	NA	NA	NA	NA	NA	NA	NA	NA	NA	NA	NA	NA	NA	NA	NA	NA	NA	NA	NA	NA	NA
45	DE-0079739	2013	jef	pa	66	66	m	B	B	NaN	r	0	gb	0	0	0	0	0	0	0	0	0	0	0	NaN	NA	NA	NA	NA	NA	0	NA	NA	NA	NA	NA	NA	NA	NA	NA	NA	NA	NA	NA	NA	NA	NA	NA	NA
46	DE-0079750	2013	lan	pa	66	66	m	l	t	NaN	r	1	gb	0	0	0	0	0	0	0	0	0	0	0	NaN	NA	NA	NA	0	NA	NA	NA	NA	NA	NA	NA	NA	NA	NA	NA	NA	NA	NA	NA	NA	NA	NA	NA	NA
47	DE-0079751	2013	jef	pa	69	69	f	l	f	NaN	r	0	gb	0	0	0	0	0	0	0	0	0	0	0	NaN	NA	NA	NA	0	NA	0	NA	NA	NA	NA	NA	NA	NA	NA	NA	NA	NA	NA	NA	NA	NA	NA	NA	NA
48	DE-0079753	2013	jef	pa	59	59	m	l	f	NaN	l	0	gb	0	0	0	0	0	0	0	0	0	0	0	NaN	NA	NA	NA	0	NA	0	NA	NA	NA	NA	NA	NA	NA	NA	NA	NA	NA	NA	NA	NA	NA	NA	NA	NA
49	DE-0079847	2012	NA	NA	65	66	m	l	t	NaN	r	0	gb	0	0	0	0	0	0	0	0	0	0	0	NaN	NA	NA	NA	NA	NA	NA	NA	NA	NA	NA	NA	NA	NA	NA	NA	NA	NA	NA	NA	NA	NA	NA	NA	NA
50	DE-0080023	2013	kar	mi	48	48	m	l	t	NaN	l	0	gb	0	0	0	0	0	0	0	0	0	0	0	NaN	NA	NA	NA	0	NA	0	NA	NA	NA	NA	NA	NA	NA	NA	NA	NA	NA	NA	NA	NA	NA	NA	NA	NA
51	DE-0080027	2013	harp	mi	66	66	f	l	t	NaN	r	0	gb	0	0	0	0	0	0	0	0	0	0	0	NaN	NA	NA	NA	0	NA	0	NA	NA	NA	NA	NA	NA	NA	NA	NA	NA	NA	NA	NA	NA	NA	NA	NA	NA
52	DE-0080157	2012	sjh	az	46	46	m	ST	CC	NaN	NA	0	gb	0	0	1	0	0	0	0	0	0	0	0	NaN	NA	NA	NA	0	NA	0	NA	NA	NA	NA	NA	NA	NA	NA	NA	NA	NA	NA	NA	NA	NA	NA	NA	NA
53	DE-0080169	2010	luke	tx	50	53	f	l	p	NaN	l	0	gb	0	0	0	0	0	0	0	0	0	0	0	NaN	NA	NA	NA	0	NA	0	NA	NA	NA	NA	NA	NA	NA	NA	NA	NA	NA	NA	NA	NA	NA	NA	NA	NA
54	DE-0080278	2013	sam	ny	64	64	f	l	f	NaN	r	0	gb	0	0	0	0	0	0	0	0	0	0	0	NaN	NA	NA	NA	0	NA	0	NA	NA	NA	NA	NA	NA	NA	NA	NA	NA	NA	NA	NA	NA	NA	NA	NA	NA
55	DE-0080287	2013	harp	mi	46	46	f	B	B	NaN	l	0	gb	0	0	0	0	0	0	0	0	0	0	0	NaN	NA	NA	NA	0	NA	0	NA	NA	NA	NA	NA	NA	NA	NA	NA	NA	NA	NA	NA	NA	NA	NA	NA	NA
56	DE-0080311	2013	ced	ca	68	68	m	l	p	NaN	r	0	gb	0	0	1	0	0	0	0	0	0	0	0	NaN	NA	NA	NA	0	NA	0	NA	NA	NA	NA	NA	NA	NA	NA	NA	NA	NA	NA	NA	NA	NA	NA	NA	NA
57	DE-0080313	2013	wash	wa	54	54	f	B	B	NaN	NA	0	gb	0	0	0	0	0	0	0	0	0	0	0	NaN	NA	NA	NA	NA	NA	NA	NA	NA	NA	NA	NA	NA	NA	NA	NA	NA	NA	NA	NA	NA	NA	NA	NA	NA
58	DE-0080321	2012	geis	pa	63	64	f	B	B	NaN	r	0	gb	0	0	0	0	0	0	0	0	0	0	0	NaN	NA	NA	NA	0	NA	0	NA	NA	NA	NA	NA	NA	NA	NA	NA	NA	NA	NA	NA	NA	NA	NA	NA	NA
59	DE-0080327	2012	froed	wi	65	66	m	B	B	NaN	r	0	gb	0	0	0	0	0	0	0	0	0	0	0	NaN	NA	NA	NA	0	NA	0	NA	NA	NA	NA	NA	NA	NA	NA	NA	NA	NA	NA	NA	NA	NA	NA	NA	NA
60	DE-0080378	2013	jef	pa	66	66	f	l	t	NaN	r	0	gb	0	0	0	0	0	0	0	0	0	0	0	NaN	NA	NA	NA	0	NA	0	NA	NA	NA	NA	NA	NA	NA	NA	NA	NA	NA	NA	NA	NA	NA	NA	NA	NA
61	DE-0080379	2012	jef	pa	55	57	f	l	f	NaN	l	0	gb	0	0	0	0	0	0	0	0	0	0	0	NaN	NA	NA	NA	0	NA	0	NA	NA	NA	NA	NA	NA	NA	NA	NA	NA	NA	NA	NA	NA	NA	NA	NA	NA
62	DE-0080483	2013	ced	ca	48	48	m	l	f	NaN	r	0	gb	0	0	1	0	0	0	0	0	0	0	0	NaN	NA	NA	NA	0	NA	0	NA	NA	NA	NA	NA	NA	NA	NA	NA	NA	NA	NA	NA	NA	NA	NA	NA	NA
63	DE-0080539	2013	scot	az	54	54	m	l	t	NaN	l	0	gb	0	0	0	0	0	0	0	0	0	0	0	NaN	NA	NA	NA	0	NA	0	NA	NA	NA	NA	NA	NA	NA	NA	NA	NA	NA	NA	NA	NA	NA	NA	NA	NA
64	DE-0080590	2012	sharp	ca	45	46	f	l	p	NaN	r	0	gb	0	0	0	0	0	0	0	0	0	0	0	NaN	NA	NA	NA	NA	NA	NA	NA	NA	NA	NA	NA	NA	NA	NA	NA	NA	NA	NA	NA	NA	NA	NA	NA	NA
65	DE-0080760	2013	ced	ca	54	54	m	l	p	NaN	r	0	gb	0	0	1	0	0	0	0	0	0	0	0	NaN	NA	NA	NA	0	NA	0	NA	NA	NA	NA	NA	NA	NA	NA	NA	NA	NA	NA	NA	NA	NA	NA	NA	NA
66	DE-0080812	2013	NA	NA	39	39	m	l	t	NaN	r	0	gb	0	0	0	0	0	0	0	0	0	0	0	NaN	NA	NA	NA	0	NA	0	NA	NA	NA	NA	NA	NA	NA	NA	NA	NA	NA	NA	NA	NA	NA	NA	NA	NA
67	DE-0080818	2013	ced	ca	60	60	f	l	p	NaN	r	0	gb	0	0	1	0	0	0	0	0	0	0	0	NaN	NA	NA	NA	0	NA	0	NA	NA	NA	NA	NA	NA	NA	NA	NA	NA	NA	NA	NA	NA	NA	NA	NA	NA
68	DE-0080972	2012	sjh	az	40	41	f	B	B	NaN	NA	0	gb	0	0	0	0	0	0	0	0	0	0	0	NaN	NA	NA	NA	0	NA	0	NA	NA	NA	NA	NA	NA	NA	NA	NA	NA	NA	NA	NA	NA	NA	NA	NA	NA
69	DE-0081039	2013	ced	ca	55	55	m	l	f	NaN	l	0	gb	0	0	0	0	0	0	0	0	0	0	0	NaN	NA	NA	NA	NA	NA	NA	NA	NA	NA	NA	NA	NA	NA	NA	NA	NA	NA	NA	NA	NA	NA	NA	NA	NA
70	DE-0081076	2013	ced	ca	60	60	m	l	f	NaN	l	0	gb	0	0	1	0	0	0	0	0	0	0	0	NaN	NA	NA	NA	0	NA	0	NA	NA	NA	NA	NA	NA	NA	NA	NA	NA	NA	NA	NA	NA	NA	NA	NA	NA
71	DE-0081219	2013	ua	az	67	67	m	l	o	NaN	r	0	gb	0	0	1	0	0	0	0	0	0	0	0	NaN	NA	NA	NA	0	NA	0	NA	NA	NA	NA	NA	NA	NA	NA	NA	NA	NA	NA	NA	NA	NA	NA	NA	NA
72	DE-0081282	2013	caro	nc	61	61	f	l	o	NaN	r	0	gb	0	0	1	0	0	0	0	0	0	0	0	NaN	NA	NA	NA	0	NA	0	NA	NA	NA	NA	NA	NA	NA	NA	NA	NA	NA	NA	NA	NA	NA	NA	NA	NA
73	DE-0081363	2013	nw	il	78	78	f	l	p	NaN	r	0	gb	0	0	0	0	0	0	0	0	0	0	0	NaN	NA	NA	NA	NA	NA	NA	NA	NA	NA	NA	NA	NA	NA	NA	NA	NA	NA	NA	NA	NA	NA	NA	NA	NA
74	DE-0081453	2013	penn	pa	67	68	f	l	o	NaN	l	0	gb	0	0	0	0	0	0	0	0	0	0	0	NaN	NA	NA	NA	0	NA	0	NA	NA	NA	NA	NA	NA	NA	NA	NA	NA	NA	NA	NA	NA	NA	NA	NA	NA
75	DE-0081805	2013	froed	wi	60	61	m	l	t	NaN	l	0	gb	0	0	0	0	0	0	0	0	0	0	0	NaN	NA	NA	NA	0	NA	0	NA	NA	NA	NA	NA	NA	NA	NA	NA	NA	NA	NA	NA	NA	NA	NA	NA	NA
76	DE-0081932	2013	sjh	az	49	49	f	B	B	NaN	NA	0	gb	0	0	0	0	0	0	0	0	0	0	0	NaN	NA	NA	NA	0	NA	0	NA	NA	NA	NA	NA	NA	NA	NA	NA	NA	NA	NA	NA	NA	NA	NA	NA	NA
77	DE-0081976	2013	meth	tx	73	73	m	ml	ft	NaN	r	0	gb	0	0	0	0	0	0	0	0	0	0	0	NaN	NA	NA	NA	0	NA	0	NA	NA	NA	NA	NA	NA	NA	NA	NA	NA	NA	NA	NA	NA	NA	NA	NA	NA
78	DE-0081977	2011	luke	tx	58	60	f	l	p	NaN	r	0	gb	0	0	0	0	0	0	0	0	0	0	0	NaN	NA	NA	NA	0	NA	0	NA	NA	NA	NA	NA	NA	NA	NA	NA	NA	NA	NA	NA	NA	NA	NA	NA	NA
79	DE-0081980	2012	meth	tx	52	54	f	l	t	NaN	r	0	gb	0	0	0	0	0	0	0	0	0	0	0	NaN	NA	NA	NA	0	NA	0	NA	NA	NA	NA	NA	NA	NA	NA	NA	NA	NA	NA	NA	NA	NA	NA	NA	NA
80	DE-0081982	2012	luke	tx	56	59	m	l	f	NaN	l	0	gb	0	0	0	0	0	0	0	0	0	0	0	NaN	NA	NA	NA	0	NA	NA	NA	NA	NA	NA	NA	NA	NA	NA	NA	NA	NA	NA	NA	NA	NA	NA	NA	NA
81	DE-0081987	2013	imm	ne	89	89	m	B	B	NaN	r	0	gb	0	0	0	0	0	0	0	0	0	0	0	NaN	NA	NA	NA	NA	NA	NA	NA	NA	NA	NA	NA	NA	NA	NA	NA	NA	NA	NA	NA	NA	NA	NA	NA	NA
82	DE-0081988	2012	luke	tx	57	61	m	B	B	NaN	NA	0	gb	0	0	0	0	0	0	0	0	0	0	0	NaN	NA	NA	NA	0	NA	NA	NA	NA	NA	NA	NA	NA	NA	NA	NA	NA	NA	NA	NA	NA	NA	NA	NA	NA
83	DE-0082165	2009	falls	id	47	52	f	l	f	NaN	l	0	gb	0	0	0	0	0	0	0	0	0	0	0	NaN	NA	NA	NA	0	NA	0	NA	NA	NA	NA	NA	NA	NA	NA	NA	NA	NA	NA	NA	NA	NA	NA	NA	NA
84	DE-0082232	2012	caro	nc	67	68	m	l	po	NaN	l	0	gb	0	0	0	0	0	0	0	0	0	0	0	NaN	NA	NA	NA	0	NA	0	NA	NA	NA	NA	NA	NA	NA	NA	NA	NA	NA	NA	NA	NA	NA	NA	NA	NA
85	DE-0082281	2013	gt	dc	58	58	m	B	B	NaN	NA	0	gb	0	0	0	0	0	0	0	0	0	0	0	NaN	NA	NA	NA	NA	NA	NA	NA	NA	NA	NA	NA	NA	NA	NA	NA	NA	NA	NA	NA	NA	NA	NA	NA	NA
86	DE-0082316	2012	penn	pa	62	63	m	l	t	NaN	l	0	gb	0	0	0	0	0	0	0	0	0	0	0	NaN	NA	NA	NA	0	NA	0	NA	NA	NA	NA	NA	NA	NA	NA	NA	NA	NA	NA	NA	NA	NA	NA	NA	NA
87	DE-0082323	2013	msl	tx	64	64	m	ml	fp	NaN	r	0	gb	0	0	1	0	0	0	0	0	0	0	0	NaN	NA	NA	NA	0	NA	0	NA	NA	NA	NA	NA	NA	NA	NA	NA	NA	NA	NA	NA	NA	NA	NA	NA	NA
88	DE-0082467	2013	wjef	la	50	50	m	B	B	NaN	NA	0	gb	0	0	0	0	0	0	0	0	0	0	0	NaN	NA	NA	NA	0	NA	0	NA	NA	NA	NA	NA	NA	NA	NA	NA	NA	NA	NA	NA	NA	NA	NA	NA	NA
89	DE-0082470	2012	meth	tx	65	67	f	l	p	NaN	l	0	gb	0	0	0	0	0	0	0	0	0	0	0	NaN	NA	NA	NA	0	NA	0	NA	NA	NA	NA	NA	NA	NA	NA	NA	NA	NA	NA	NA	NA	NA	NA	NA	NA
90	DE-0082513	2013	luke	tx	48	48	m	ST	PIN	NaN	c	0	gb	0	0	0	0	0	0	0	0	0	0	0	NaN	NA	NA	NA	0	NA	0	NA	NA	NA	NA	NA	NA	NA	NA	NA	NA	NA	NA	NA	NA	NA	NA	NA	NA
91	DE-0082705	2013	NA	NA	55	56	m	B	B	NaN	NA	0	gb	0	0	0	0	0	0	0	0	0	0	0	NaN	NA	NA	NA	0	NA	0	NA	NA	NA	NA	NA	NA	NA	NA	NA	NA	NA	NA	NA	NA	NA	NA	NA	NA
92	DE-0082738	2013	meth	tx	80	80	f	l	f	NaN	l	0	gb	0	0	0	0	0	0	0	0	0	0	0	NaN	NA	NA	NA	0	NA	0	NA	NA	NA	NA	NA	NA	NA	NA	NA	NA	NA	NA	NA	NA	NA	NA	NA	NA
93	DE-0082741	2012	sam	ny	42	43	f	l	f	NaN	l	0	gb	0	0	0	0	0	0	0	0	0	0	0	NaN	NA	NA	NA	NA	NA	NA	NA	NA	NA	NA	NA	NA	NA	NA	NA	NA	NA	NA	NA	NA	NA	NA	NA	NA
94	DE-0083074	2013	jef	pa	77	77	m	l	f	NaN	NA	0	gb	0	0	0	0	0	0	0	0	0	0	0	NaN	NA	NA	NA	0	NA	0	NA	NA	NA	NA	NA	NA	NA	NA	NA	NA	NA	NA	NA	NA	NA	NA	NA	NA
95	DE-0083077	2013	jef	pa	59	59	f	l	p	NaN	l	0	gb	0	0	0	0	0	0	0	0	0	0	0	NaN	NA	NA	NA	0	NA	0	NA	NA	NA	NA	NA	NA	NA	NA	NA	NA	NA	NA	NA	NA	NA	NA	NA	NA
96	DE-0083095	2013	jef	pa	58	58	m	B	B	NaN	NA	0	gb	0	0	0	0	0	0	0	0	0	0	0	NaN	NA	NA	NA	NA	NA	0	NA	NA	NA	NA	NA	NA	NA	NA	NA	NA	NA	NA	NA	NA	NA	NA	NA	NA
97	DE-0083096	2013	jef	pa	54	55	f	l	p	NaN	r	0	gb	0	0	0	0	0	0	0	0	0	0	0	NaN	NA	NA	NA	0	NA	0	NA	NA	NA	NA	NA	NA	NA	NA	NA	NA	NA	NA	NA	NA	NA	NA	NA	NA
98	DE-0083097	2013	jef	pa	60	60	m	B	B	NaN	NA	0	gb	0	0	0	0	0	0	0	0	0	0	0	NaN	NA	NA	NA	0	NA	0	NA	NA	NA	NA	NA	NA	NA	NA	NA	NA	NA	NA	NA	NA	NA	NA	NA	NA
99	DE-0083098	2013	jef	pa	88	88	m	ST	CC	NaN	c	0	gb	0	0	0	0	0	0	0	0	0	0	0	NaN	NA	NA	NA	0	NA	0	NA	NA	NA	NA	NA	NA	NA	NA	NA	NA	NA	NA	NA	NA	NA	NA	NA	NA
100	DE-0083235	2012	pin	pa	50	52	m	l	f	NaN	l	0	gb	0	0	0	0	0	0	0	0	0	0	0	NaN	NA	NA	NA	0	NA	NA	NA	NA	NA	NA	NA	NA	NA	NA	NA	NA	NA	NA	NA	NA	NA	NA	NA	NA
101	DE-0083262	2013	mort	fl	47	47	f	ml	fp	NaN	r	0	gb	1	1	0	0	0	0	0	0	0	0	0	NaN	NA	NA	NA	0	NA	0	NA	NA	NA	NA	NA	NA	NA	NA	NA	NA	NA	NA	NA	NA	NA	NA	NA	NA
102	DE-0083300	2013	cam	ca	48	49	m	B	B	NaN	NA	0	gb	0	0	0	0	0	0	0	0	0	0	0	NaN	NA	NA	NA	0	NA	0	NA	NA	NA	NA	NA	NA	NA	NA	NA	NA	NA	NA	NA	NA	NA	NA	NA	NA
103	DE-0083327	2013	ced	ca	68	68	m	l	p	NaN	r	0	gb	0	0	1	0	0	0	0	0	0	0	0	NaN	NA	NA	NA	NA	NA	NA	NA	NA	NA	NA	NA	NA	NA	NA	NA	NA	NA	NA	NA	NA	NA	NA	NA	NA
104	DE-0083328	2013	ced	ca	54	54	m	l	p	NaN	r	0	gb	0	0	1	0	0	0	0	0	0	0	0	NaN	NA	NA	NA	NA	NA	NA	NA	NA	NA	NA	NA	NA	NA	NA	NA	NA	NA	NA	NA	NA	NA	NA	NA	NA
2009	DE-0083397	2009	meth	tx	55	60	m	l	t	NaN	l	0	gb	0	0	0	0	0	0	0	0	0	0	0	NaN	NA	NA	NA	0	NA	0	NA	NA	NA	NA	NA	NA	NA	NA	NA	NA	NA	NA	NA	NA	NA	NA	NA	NA
106	DE-0083431	2012	scr	ca	70	71	m	IT	CB	NaN	r	0	gb	0	0	0	0	0	0	0	0	0	0	0	NaN	NA	NA	NA	0	NA	0	NA	NA	NA	NA	NA	NA	NA	NA	NA	NA	NA	NA	NA	NA	NA	NA	NA	NA
107	DE-0083481	2013	muir	ca	69	69	m	l	t	NaN	l	0	gb	0	0	0	0	0	0	0	0	0	0	0	NaN	NA	NA	NA	0	NA	0	NA	NA	NA	NA	NA	NA	NA	NA	NA	NA	NA	NA	NA	NA	NA	NA	NA	NA
108	DE-0083617	2013	luke	tx	61	61	f	B	B	NaN	NA	0	gb	0	0	0	0	0	0	0	0	0	0	0	NaN	NA	NA	NA	0	NA	0	NA	NA	NA	NA	NA	NA	NA	NA	NA	NA	NA	NA	NA	NA	NA	NA	NA	NA
109	DE-0083638	2013	arl	tx	56	56	m	l	f	NaN	l	0	gb	0	0	0	1	0	0	0	0	0	0	0	NaN	NA	NA	NA	NA	NA	NA	NA	NA	NA	NA	NA	NA	NA	NA	NA	NA	NA	NA	NA	NA	NA	NA	NA	NA
110	DE-0083719	2013	sb	ca	46	46	m	l	o	NaN	l	0	gb	0	0	0	0	0	0	0	0	0	0	0	NaN	NA	NA	NA	0	NA	0	NA	NA	NA	NA	NA	NA	NA	NA	NA	NA	NA	NA	NA	NA	NA	NA	NA	NA
111	DE-0083789	2010	sjh	az	57	57	m	l	p	NaN	l	0	gb	0	0	0	0	0	0	0	0	0	0	0	NaN	NA	NA	NA	NA	NA	NA	NA	NA	NA	NA	NA	NA	NA	NA	NA	NA	NA	NA	NA	NA	NA	NA	NA	NA
112	DE-0083895	2012	sjh	az	56	57	f	l	t	NaN	r	0	gb	0	0	0	0	0	0	0	0	0	0	0	NaN	NA	NA	NA	0	NA	0	NA	NA	NA	NA	NA	NA	NA	NA	NA	NA	NA	NA	NA	NA	NA	NA	NA	NA
113	DE-0083933	2011	scr	ca	43	46	m	l	f	NaN	l	0	gb	0	0	0	0	0	0	0	0	0	0	0	NaN	NA	NA	NA	NA	NA	NA	NA	NA	NA	NA	NA	NA	NA	NA	NA	NA	NA	NA	NA	NA	NA	NA	NA	NA
114	DE-0084072	2013	penn	pa	74	74	f	B	B	NaN	r	0	gb	0	0	0	0	0	0	0	0	0	0	0	NaN	NA	NA	NA	0	NA	0	NA	NA	NA	NA	NA	NA	NA	NA	NA	NA	NA	NA	NA	NA	NA	NA	NA	NA
115	DE-0084178	2013	cop	or	47	47	m	l	f	NaN	r	0	gb	0	0	0	0	0	0	0	0	0	0	0	NaN	NA	NA	NA	0	NA	0	NA	NA	NA	NA	NA	NA	NA	NA	NA	NA	NA	NA	NA	NA	NA	NA	NA	NA
116	DE-0084199	2013	ns	ny	55	55	m	l	t	NaN	r	0	gb	1	0	0	0	0	0	0	0	0	0	0	NaN	NA	NA	NA	0	NA	0	NA	NA	NA	NA	NA	NA	NA	NA	NA	NA	NA	NA	NA	NA	NA	NA	NA	NA
117	DE-0084246	2013	scot	az	69	69	m	l	t	NaN	r	0	gb	0	0	0	0	0	0	0	0	0	0	0	NaN	NA	NA	NA	0	NA	0	NA	NA	NA	NA	NA	NA	NA	NA	NA	NA	NA	NA	NA	NA	NA	NA	NA	NA
118	DE-0084263	2013	meth	tx	62	62	m	SC	L	NaN	c	0	gb	0	0	0	0	0	0	0	0	0	0	0	NaN	NA	NA	NA	0	NA	0	NA	NA	NA	NA	NA	NA	NA	NA	NA	NA	NA	NA	NA	NA	NA	NA	NA	NA
119	DE-0084294	2013	plano	tx	50	50	m	l	t	NaN	r	0	gb	1	1	0	0	0	0	0	0	0	0	0	NaN	NA	NA	NA	0	NA	0	NA	NA	NA	NA	NA	NA	NA	NA	NA	NA	NA	NA	NA	NA	NA	NA	NA	NA
120	DE-0084313	2013	scr	ca	69	69	m	l	p	NaN	r	0	gb	0	0	0	0	0	0	0	0	0	0	0	NaN	NA	NA	NA	NA	NA	NA	NA	NA	NA	NA	NA	NA	NA	NA	NA	NA	NA	NA	NA	NA	NA	NA	NA	NA
121	DE-0084363	2013	sjh	az	60	60	m	l	f	NaN	r	0	gb	0	0	0	0	0	0	0	0	0	0	0	NaN	NA	NA	NA	0	NA	0	NA	NA	NA	NA	NA	NA	NA	NA	NA	NA	NA	NA	NA	NA	NA	NA	NA	NA
122	DE-0084373	2013	sjh	az	63	63	m	B	B	NaN	NA	0	gb	0	0	1	0	0	0	0	0	0	0	0	NaN	NA	NA	NA	0	NA	0	NA	NA	NA	NA	NA	NA	NA	NA	NA	NA	NA	NA	NA	NA	NA	NA	NA	NA
123	DE-0084375	2013	luke	tx	70	70	f	l	t	NaN	r	0	gb	0	0	0	0	0	0	0	0	0	0	0	NaN	NA	NA	NA	0	NA	0	NA	NA	NA	NA	NA	NA	NA	NA	NA	NA	NA	NA	NA	NA	NA	NA	NA	NA
124	DE-0084438	2013	NA	NA	70	70	f	l	f	NaN	l	0	gb	0	0	0	0	0	0	0	0	0	0	0	NaN	NA	NA	NA	0	NA	0	NA	NA	NA	NA	NA	NA	NA	NA	NA	NA	NA	NA	NA	NA	NA	NA	NA	NA
125	DE-0084643	2013	nyu	ny	78	78	m	l	t	NaN	r	0	gb	0	0	0	0	0	0	0	0	0	0	0	NaN	NA	NA	NA	0	NA	0	NA	NA	NA	NA	NA	NA	NA	NA	NA	NA	NA	NA	NA	NA	NA	NA	NA	NA
126	DE-0084696	2013	jef	pa	74	74	m	l	f	NaN	l	0	gb	0	0	0	0	0	0	0	0	0	0	0	NaN	NA	NA	NA	0	NA	0	NA	NA	NA	NA	NA	NA	NA	NA	NA	NA	NA	NA	NA	NA	NA	NA	NA	NA
127	DE-0084705	2011	holy	pa	61	63	f	l	t	NaN	NA	0	gb	0	0	0	0	0	0	0	0	0	0	0	NaN	NA	NA	NA	0	NA	0	NA	NA	NA	NA	NA	NA	NA	NA	NA	NA	NA	NA	NA	NA	NA	NA	NA	NA
128	DE-0084734	2013	cap	nj	61	61	f	l	t	NaN	l	1	gb	0	0	0	0	0	0	0	0	0	0	0	NaN	NA	NA	NA	0	NA	0	NA	NA	NA	NA	NA	NA	NA	NA	NA	NA	NA	NA	NA	NA	NA	NA	NA	NA
129	DE-0084871	2014	meth	tx	57	57	m	l	f	NaN	l	0	gb	0	0	0	0	0	0	0	0	0	0	0	NaN	NA	NA	NA	0	NA	0	NA	NA	NA	NA	NA	NA	NA	NA	NA	NA	NA	NA	NA	NA	NA	NA	NA	NA
130	DE-0084923	2014	apmc	la	72	72	m	l	t	NaN	l	0	gb	0	0	0	0	0	0	0	0	0	0	0	NaN	NA	NA	NA	NA	NA	NA	NA	NA	NA	NA	NA	NA	NA	NA	NA	NA	NA	NA	NA	NA	NA	NA	NA	NA
131	DE-0084958	2013	sinai	fl	55	56	f	l	p	NaN	r	0	gb	0	0	0	0	0	0	0	0	0	0	0	NaN	NA	NA	NA	NA	NA	NA	NA	NA	NA	NA	NA	NA	NA	NA	NA	NA	NA	NA	NA	NA	NA	NA	NA	NA
132	DE-0085058	2013	sjh	az	56	56	f	l	o	NaN	l	0	gb	0	0	0	0	0	0	0	0	0	0	0	NaN	NA	NA	NA	1	NA	0	NA	NA	NA	NA	NA	NA	NA	NA	NA	NA	NA	NA	NA	NA	NA	NA	NA	NA
133	DE-0085070	2013	fh	fl	60	60	m	ST	CH	NaN	l	0	gb	0	0	1	0	0	0	0	0	0	0	0	NaN	NA	NA	NA	0	NA	0	NA	NA	NA	NA	NA	NA	NA	NA	NA	NA	NA	NA	NA	NA	NA	NA	NA	NA
134	DE-0085086	2013	penn	pa	54	54	m	l	p	NaN	r	0	gb	0	0	0	0	0	0	0	0	0	0	0	NaN	NA	NA	NA	0	NA	0	NA	NA	NA	NA	NA	NA	NA	NA	NA	NA	NA	NA	NA	NA	NA	NA	NA	NA
135	DE-0085189	2013	prov	wa	58	58	m	ST	TH	NaN	r	0	gb	0	0	0	0	0	0	0	0	0	0	0	NaN	NA	NA	NA	0	NA	0	NA	NA	NA	NA	NA	NA	NA	NA	NA	NA	NA	NA	NA	NA	NA	NA	NA	NA
136	DE-0085285	2012	fh	fl	61	63	f	B	B	NaN	NA	0	gb	0	0	0	0	0	0	0	0	0	0	0	NaN	NA	NA	NA	0	NA	0	NA	NA	NA	NA	NA	NA	NA	NA	NA	NA	NA	NA	NA	NA	NA	NA	NA	NA
137	DE-0085352	2014	meth	tx	36	36	m	l	t	NaN	r	0	gb	0	0	0	0	0	0	0	0	0	0	0	NaN	NA	NA	NA	0	NA	0	NA	NA	NA	NA	NA	NA	NA	NA	NA	NA	NA	NA	NA	NA	NA	NA	NA	NA
138	DE-0085367	2014	scot	az	63	62	m	l	f	NaN	r	0	gb	0	0	0	0	0	0	0	0	0	0	0	NaN	NA	NA	NA	0	NA	0	NA	NA	NA	NA	NA	NA	NA	NA	NA	NA	NA	NA	NA	NA	NA	NA	NA	NA
139	DE-0085443	2014	lima	oh	64	64	f	B	B	NaN	NA	0	gb	0	0	0	0	0	0	0	0	0	0	0	NaN	NA	NA	NA	0	NA	0	NA	NA	NA	NA	NA	NA	NA	NA	NA	NA	NA	NA	NA	NA	NA	NA	NA	NA
140	DE-0085481	2013	jef	pa	64	65	f	l	t	NaN	r	0	gb	0	0	0	0	0	0	0	0	0	0	0	NaN	NA	NA	NA	0	NA	0	NA	NA	NA	NA	NA	NA	NA	NA	NA	NA	NA	NA	NA	NA	NA	NA	NA	NA
141	DE-0085599	2013	NA	NA	55	56	m	l	t	NaN	l	0	gb	1	0	0	0	0	0	0	0	0	0	0	NaN	NA	NA	NA	NA	NA	NA	NA	NA	NA	NA	NA	NA	NA	NA	NA	NA	NA	NA	NA	NA	NA	NA	NA	NA
142	DE-0085623	2014	meth	tx	31	31	m	B	B	NaN	l	0	gb	0	0	1	0	0	0	0	0	0	0	0	NaN	NA	NA	NA	0	NA	0	NA	NA	NA	NA	NA	NA	NA	NA	NA	NA	NA	NA	NA	NA	NA	NA	NA	NA
143	DE-0085633	2013	sinai	fl	55	56	f	l	p	NaN	r	0	gb	0	0	0	0	0	0	0	0	0	0	0	NaN	NA	NA	NA	0	NA	0	NA	NA	NA	NA	NA	NA	NA	NA	NA	NA	NA	NA	NA	NA	NA	NA	NA	NA
144	DE-0085699	2014	fh	fl	64	64	m	l	t	NaN	r	0	gb	0	0	0	0	0	0	0	0	0	0	0	dural-based	NA	NA	NA	0	NA	0	NA	NA	NA	NA	NA	NA	NA	NA	NA	NA	NA	NA	NA	NA	NA	NA	NA	NA
145	DE-0085856	2011	upmc	pa	53	56	f	l	t	NaN	r	0	gb	1	0	0	0	0	0	0	0	0	0	0	NaN	NA	NA	NA	0	NA	NA	NA	NA	NA	NA	NA	NA	NA	NA	NA	NA	NA	NA	NA	NA	NA	NA	NA	NA
146	DE-0085859	2014	penn	pa	72	72	f	B	B	NaN	r	0	gb	0	0	0	0	0	0	0	0	0	0	0	NaN	NA	NA	NA	0	NA	0	NA	NA	NA	NA	NA	NA	NA	NA	NA	NA	NA	NA	NA	NA	NA	NA	NA	NA
147	DE-0085927	2014	ced	ca	45	45	m	l	f	NaN	r	0	gb	0	0	1	0	0	0	0	0	0	0	0	NaN	NA	NA	NA	NA	NA	NA	NA	NA	NA	NA	NA	NA	NA	NA	NA	NA	NA	NA	NA	NA	NA	NA	NA	NA
148	DE-0085977	2014	rml	ok	60	60	m	B	B	NaN	NA	0	gb	0	0	0	0	0	0	0	0	0	0	0	NaN	NA	NA	NA	NA	NA	NA	NA	NA	NA	NA	NA	NA	NA	NA	NA	NA	NA	NA	NA	NA	NA	NA	NA	NA
149	DE-0086093	2014	ced	ca	30	30	f	l	f	NaN	r	0	gb	0	0	1	0	0	0	0	0	0	0	0	NaN	NA	NA	NA	1	NA	0	NA	NA	NA	NA	NA	NA	NA	NA	NA	NA	NA	NA	NA	NA	NA	NA	NA	NA
150	DE-0086200	2014	theda	wi	69	69	f	l	t	NaN	r	0	gb	0	0	0	0	0	0	0	0	0	0	0	NaN	NA	NA	NA	0	NA	0	NA	NA	NA	NA	NA	NA	NA	NA	NA	NA	NA	NA	NA	NA	NA	NA	NA	NA
151	DE-0086223	2012	ana	ca	54	56	m	l	f	NaN	NA	1	gb	0	0	0	0	0	0	0	0	0	0	0	NaN	NA	NA	NA	0	NA	0	NA	NA	NA	NA	NA	NA	NA	NA	NA	NA	NA	NA	NA	NA	NA	NA	NA	NA
152	DE-0086225	2014	bay	tx	58	58	m	l	p	NaN	r	0	gb	1	0	0	0	0	0	0	0	0	0	0	NaN	NA	NA	NA	0	NA	0	NA	NA	NA	NA	NA	NA	NA	NA	NA	NA	NA	NA	NA	NA	NA	NA	NA	NA
153	DE-0086483	2012	jef	pa	33	34	m	l	t	NaN	l	0	gb	0	0	0	0	0	0	0	0	0	0	0	NaN	NA	NA	NA	0	NA	0	NA	NA	NA	NA	NA	NA	NA	NA	NA	NA	NA	NA	NA	NA	NA	NA	NA	NA
154	DE-0086615	2014	arl	tx	64	64	f	l	t	NaN	l	0	gb	0	0	0	0	0	0	0	0	0	0	0	NaN	NA	NA	NA	NA	NA	NA	NA	NA	NA	NA	NA	NA	NA	NA	NA	NA	NA	NA	NA	NA	NA	NA	NA	NA
155	DE-0086621	2013	scr	ca	55	56	m	l	f	NaN	NA	1	gb	0	0	1	0	0	0	0	0	0	0	0	NaN	NA	NA	NA	NA	NA	NA	NA	NA	NA	NA	NA	NA	NA	NA	NA	NA	NA	NA	NA	NA	NA	NA	NA	NA
156	DE-0086644	2014	sal	ks	61	61	f	B	B	NaN	NA	0	gb	0	0	1	0	0	0	0	0	0	0	0	NaN	NA	NA	NA	0	NA	0	NA	NA	NA	NA	NA	NA	NA	NA	NA	NA	NA	NA	NA	NA	NA	NA	NA	NA
157	DE-0086654	2013	mskcc	ny	65	66	m	l	t	NaN	l	0	gb	0	0	0	0	0	0	0	0	0	0	0	NaN	NA	NA	NA	0	NA	0	NA	NA	NA	NA	NA	NA	NA	NA	NA	NA	NA	NA	NA	NA	NA	NA	NA	NA
158	DE-0086767	2014	meth	tx	75	75	m	ml	po	NaN	l	0	gb	0	0	0	0	0	0	0	0	0	0	0	NaN	NA	NA	NA	0	NA	0	NA	NA	NA	NA	NA	NA	NA	NA	NA	NA	NA	NA	NA	NA	NA	NA	NA	NA
159	DE-0086827	2014	luke	tx	56	56	m	l	t	NaN	l	0	gb	0	0	0	0	0	0	0	0	0	0	0	NaN	NA	NA	NA	0	NA	0	NA	NA	NA	NA	NA	NA	NA	NA	NA	NA	NA	NA	NA	NA	NA	NA	NA	NA
160	DE-0086884	2014	fh	fl	72	72	f	ml	tp	NaN	r	0	gb	0	0	1	0	0	0	0	0	0	0	0	NaN	NA	NA	NA	0	NA	0	NA	NA	NA	NA	NA	NA	NA	NA	NA	NA	NA	NA	NA	NA	NA	NA	NA	NA
161	DE-0086932	2013	penn	pa	55	56	f	ml	tp	NaN	r	0	gb	0	0	0	0	0	0	0	0	0	0	0	NaN	NA	NA	NA	0	NA	0	NA	NA	NA	NA	NA	NA	NA	NA	NA	NA	NA	NA	NA	NA	NA	NA	NA	NA
162	DE-0086952	2013	jef	pa	61	62	m	l	f	NaN	r	0	gb	1	0	0	0	0	0	0	0	0	0	0	NaN	NA	NA	NA	0	NA	0	NA	NA	NA	NA	NA	NA	NA	NA	NA	NA	NA	NA	NA	NA	NA	NA	NA	NA
163	DE-0086960	2014	fh	fl	42	42	m	ml	fp	NaN	l	0	gb	0	0	0	0	0	0	0	0	0	0	0	NaN	NA	NA	NA	0	NA	0	NA	NA	NA	NA	NA	NA	NA	NA	NA	NA	NA	NA	NA	NA	NA	NA	NA	NA
164	DE-0087011	2013	ced	ca	61	61	m	l	f	NaN	l	0	gb	0	0	1	0	0	0	0	0	0	0	0	NaN	NA	NA	NA	0	NA	0	NA	NA	NA	NA	NA	NA	NA	NA	NA	NA	NA	NA	NA	NA	NA	NA	NA	NA
165	DE-0087031	2014	fh	fl	69	69	f	ml	tp	NaN	r	0	gb	0	0	0	0	0	0	0	0	0	0	0	NaN	NA	NA	NA	0	NA	0	NA	NA	NA	NA	NA	NA	NA	NA	NA	NA	NA	NA	NA	NA	NA	NA	NA	NA
166	DE-0087128	2014	NA	NA	80	80	m	l	f	NaN	r	0	gb	0	0	0	0	0	0	0	0	0	0	0	NaN	NA	NA	NA	0	NA	0	NA	NA	NA	NA	NA	NA	NA	NA	NA	NA	NA	NA	NA	NA	NA	NA	NA	NA
167	DE-0087168	2013	sam	ny	82	82	m	l	t	NaN	l	0	gb	0	0	0	0	0	0	0	0	0	0	0	NaN	NA	NA	NA	0	NA	0	NA	NA	NA	NA	NA	NA	NA	NA	NA	NA	NA	NA	NA	NA	NA	NA	NA	NA
168	DE-0087282	2014	ced	ca	43	43	m	l	p	NaN	r	0	gb	0	0	0	0	0	0	0	0	0	0	0	NaN	NA	NA	NA	0	NA	0	NA	NA	NA	NA	NA	NA	NA	NA	NA	NA	NA	NA	NA	NA	NA	NA	NA	NA
169	DE-0087362	2011	eis	ca	69	72	f	l	f	NaN	r	0	gb	0	0	0	0	0	0	0	0	0	0	0	NaN	NA	NA	NA	NA	NA	NA	NA	NA	NA	NA	NA	NA	NA	NA	NA	NA	NA	NA	NA	NA	NA	NA	NA	NA
170	DE-0087373	2014	apmc	la	68	68	f	l	f	NaN	l	0	gb	0	0	1	0	0	0	0	0	0	0	0	NaN	NA	NA	NA	NA	NA	NA	NA	NA	NA	NA	NA	NA	NA	NA	NA	NA	NA	NA	NA	NA	NA	NA	NA	NA
171	DE-0087410	2014	scot	az	59	59	f	l	t	NaN	r	0	gb	0	0	0	0	0	0	0	0	0	0	0	NaN	NA	NA	NA	0	NA	0	NA	NA	NA	NA	NA	NA	NA	NA	NA	NA	NA	NA	NA	NA	NA	NA	NA	NA
172	DE-0087416	2014	harp	mi	45	45	m	l	o	NaN	r	0	gb	0	1	0	0	0	0	0	0	0	0	0	NaN	NA	NA	NA	0	NA	0	NA	NA	NA	NA	NA	NA	NA	NA	NA	NA	NA	NA	NA	NA	NA	NA	NA	NA
173	DE-0087455	2014	ucsd	ca	65	65	f	ml	ft	NaN	r	0	gb	0	0	0	0	0	0	0	0	0	0	0	NaN	NA	NA	NA	NA	NA	NA	NA	NA	NA	NA	NA	NA	NA	NA	NA	NA	NA	NA	NA	NA	NA	NA	NA	NA
174	DE-0087485	2014	sharp	ca	38	38	m	ml	tp	NaN	r	0	gb	1	0	0	0	0	0	0	0	0	0	0	NaN	NA	NA	NA	NA	NA	NA	NA	NA	NA	NA	NA	NA	NA	NA	NA	NA	NA	NA	NA	NA	NA	NA	NA	NA
175	DE-0087544	2013	penn	pa	67	68	f	l	p	NaN	r	0	gb	0	0	0	0	0	0	0	0	0	0	0	NaN	NA	NA	NA	0	NA	0	NA	NA	NA	NA	NA	NA	NA	NA	NA	NA	NA	NA	NA	NA	NA	NA	NA	NA
176	DE-0087545	2014	penn	pa	31	31	f	l	f	NaN	l	0	gb	0	0	0	0	0	0	0	0	0	0	0	NaN	NA	NA	NA	0	NA	0	NA	NA	NA	NA	NA	NA	NA	NA	NA	NA	NA	NA	NA	NA	NA	NA	NA	NA
177	DE-0087562	2013	lamc	ca	4	4	m	l	f	NaN	r	0	gb	0	0	0	0	0	0	0	0	0	0	0	NaN	NA	NA	NA	0	NA	0	NA	NA	NA	NA	NA	NA	NA	NA	NA	NA	NA	NA	NA	NA	NA	NA	NA	NA
178	DE-0087566	2014	sjh	az	47	47	m	ml	tp	NaN	NA	0	gb	0	0	1	0	0	0	0	0	0	0	0	NaN	NA	NA	NA	NA	NA	0	NA	NA	NA	NA	NA	NA	NA	NA	NA	NA	NA	NA	NA	NA	NA	NA	NA	NA
179	DE-0087591	2011	palo	ca	34	37	f	ST	TH	NaN	r	0	gb	0	0	1	0	0	0	0	0	0	0	0	NaN	NA	NA	NA	NA	NA	NA	NA	NA	NA	NA	NA	NA	NA	NA	NA	NA	NA	NA	NA	NA	NA	NA	NA	NA
180	DE-0087596	2013	well	pa	59	60	f	l	f	NaN	r	0	gb	0	0	1	0	0	0	0	0	0	0	0	NaN	NA	NA	NA	0	NA	0	NA	NA	NA	NA	NA	NA	NA	NA	NA	NA	NA	NA	NA	NA	NA	NA	NA	NA
181	DE-0087608	2013	penn	pa	54	54	f	l	f	NaN	l	0	gb	0	0	0	0	0	0	0	0	0	0	0	NaN	NA	NA	NA	0	NA	0	NA	NA	NA	NA	NA	NA	NA	NA	NA	NA	NA	NA	NA	NA	NA	NA	NA	NA
182	DE-0087611	2013	ced	ca	56	56	f	l	t	NaN	l	0	gb	0	0	1	0	0	0	0	0	0	0	0	NaN	NA	NA	NA	0	NA	0	NA	NA	NA	NA	NA	NA	NA	NA	NA	NA	NA	NA	NA	NA	NA	NA	NA	NA
183	DE-0087709	2013	stan	ca	69	69	m	l	f	NaN	r	0	gb	0	0	0	0	0	0	0	0	0	0	0	NaN	NA	NA	NA	NA	NA	NA	NA	NA	NA	NA	NA	NA	NA	NA	NA	NA	NA	NA	NA	NA	NA	NA	NA	NA
184	DE-0087730	2013	cp	az	64	65	m	B	B	NaN	NA	0	gb	0	1	0	0	0	0	0	0	0	0	0	NaN	NA	NA	NA	0	NA	0	NA	NA	NA	NA	NA	NA	NA	NA	NA	NA	NA	NA	NA	NA	NA	NA	NA	NA
185	DE-0087752	2014	ucsd	ca	70	70	f	l	f	NaN	r	0	gb	1	0	0	0	0	0	0	0	0	0	0	NaN	NA	NA	NA	NA	NA	NA	NA	NA	NA	NA	NA	NA	NA	NA	NA	NA	NA	NA	NA	NA	NA	NA	NA	NA
186	DE-0087820	2013	meth	tx	41	41	m	l	f	NaN	l	0	gb	0	0	0	0	0	0	0	0	0	0	0	NaN	NA	NA	NA	NA	NA	NA	NA	NA	NA	NA	NA	NA	NA	NA	NA	NA	NA	NA	NA	NA	NA	NA	NA	NA
187	DE-0087822	2013	hous	tx	44	44	f	l	p	NaN	r	0	gb	1	0	0	0	0	0	0	0	0	0	0	NaN	NA	NA	NA	NA	NA	NA	NA	NA	NA	NA	NA	NA	NA	NA	NA	NA	NA	NA	NA	NA	NA	NA	NA	NA
188	DE-0087824	2014	hous	tx	39	39	m	l	f	NaN	l	0	gb	1	0	0	0	0	0	0	0	0	0	0	NaN	NA	NA	NA	NA	NA	NA	NA	NA	NA	NA	NA	NA	NA	NA	NA	NA	NA	NA	NA	NA	NA	NA	NA	NA
189	DE-0087858	2013	meth	tx	58	58	m	B	B	NaN	NA	0	gb	0	0	0	0	0	0	0	0	0	0	0	NaN	NA	NA	NA	0	NA	0	NA	NA	NA	NA	NA	NA	NA	NA	NA	NA	NA	NA	NA	NA	NA	NA	NA	NA
190	DE-0087891	2014	jef	pa	72	72	f	l	t	NaN	NA	0	gb	0	0	0	0	0	0	0	0	0	0	0	NaN	NA	NA	NA	NA	NA	NA	NA	NA	NA	NA	NA	NA	NA	NA	NA	NA	NA	NA	NA	NA	NA	NA	NA	NA
191	DE-0087893	2013	jef	pa	71	71	m	B	B	NaN	l	0	gb	0	0	0	0	0	0	0	0	0	0	0	NaN	NA	NA	NA	0	NA	0	NA	NA	NA	NA	NA	NA	NA	NA	NA	NA	NA	NA	NA	NA	NA	NA	NA	NA
192	DE-0087894	2014	jef	pa	60	60	f	l	t	NaN	l	0	gb	0	0	0	0	0	0	0	0	0	0	0	NaN	NA	NA	NA	0	NA	0	NA	NA	NA	NA	NA	NA	NA	NA	NA	NA	NA	NA	NA	NA	NA	NA	NA	NA
193	DE-0087913	2014	luke	tx	67	67	m	ml	ft	NaN	l	0	gb	0	0	0	0	0	0	0	0	0	0	0	NaN	NA	NA	NA	0	NA	0	NA	NA	NA	NA	NA	NA	NA	NA	NA	NA	NA	NA	NA	NA	NA	NA	NA	NA
194	DE-0088031	2014	ced	ca	49	49	m	l	t	NaN	r	0	gb	0	0	0	0	0	0	0	0	0	0	0	NaN	NA	NA	NA	0	NA	0	NA	NA	NA	NA	NA	NA	NA	NA	NA	NA	NA	NA	NA	NA	NA	NA	NA	NA
195	DE-0088079	2010	roper	sc	51	55	m	B	B	NaN	NA	0	gb	0	0	1	0	0	0	0	0	0	0	0	NaN	NA	NA	NA	0	NA	NA	NA	NA	NA	NA	NA	NA	NA	NA	NA	NA	NA	NA	NA	NA	NA	NA	NA	NA
196	DE-0088103	2014	scr	ca	74	74	m	l	f	NaN	r	0	gb	0	0	0	0	0	0	0	0	0	0	0	NaN	NA	NA	NA	NA	NA	NA	NA	NA	NA	NA	NA	NA	NA	NA	NA	NA	NA	NA	NA	NA	NA	NA	NA	NA
197	DE-0088110	2014	ucsd	ca	70	70	m	l	t	NaN	l	0	gb	0	0	0	0	0	0	0	0	0	0	0	NaN	NA	NA	NA	NA	NA	NA	NA	NA	NA	NA	NA	NA	NA	NA	NA	NA	NA	NA	NA	NA	NA	NA	NA	NA
198	DE-0088119	2014	spec	mi	30	30	f	SC	T	NaN	c	0	gb	0	0	0	0	0	0	0	0	0	0	0	NaN	NA	NA	NA	NA	NA	NA	NA	NA	NA	NA	NA	NA	NA	NA	NA	NA	NA	NA	NA	NA	NA	NA	NA	NA
199	DE-0088139	2014	luke	tx	61	62	f	l	o	NaN	l	0	gb	0	0	0	0	0	0	0	0	0	0	0	NaN	NA	NA	NA	0	NA	0	NA	NA	NA	NA	NA	NA	NA	NA	NA	NA	NA	NA	NA	NA	NA	NA	NA	NA
200	DE-0088233	2014	fh	fl	46	46	m	l	f	NaN	r	0	gb	0	0	0	0	0	0	0	0	0	0	0	NaN	NA	NA	NA	NA	NA	NA	NA	NA	NA	NA	NA	NA	NA	NA	NA	NA	NA	NA	NA	NA	NA	NA	NA	NA
201	DE-0088428	2014	scot	az	67	67	f	ml	fp	NaN	r	0	gb	0	0	1	0	0	0	0	0	0	0	0	NaN	NA	NA	NA	0	NA	0	NA	NA	NA	NA	NA	NA	NA	NA	NA	NA	NA	NA	NA	NA	NA	NA	NA	NA
202	DE-0088454	2014	luke	tx	69	69	m	l	f	NaN	l	0	gb	0	0	1	0	0	0	0	0	0	0	0	NaN	NA	NA	NA	0	NA	0	NA	NA	NA	NA	NA	NA	NA	NA	NA	NA	NA	NA	NA	NA	NA	NA	NA	NA
203	DE-0088535	2014	sjh	az	44	44	m	B	B	NaN	r	0	gb	0	0	0	0	0	0	0	0	0	0	0	NaN	NA	NA	NA	0	NA	0	NA	NA	NA	NA	NA	NA	NA	NA	NA	NA	NA	NA	NA	NA	NA	NA	NA	NA
204	DE-0131126	2014	sjh	az	77	77	m	B	B	NaN	NA	0	gb	0	0	0	0	0	0	0	0	0	0	0	NaN	NA	NA	NA	0	NA	0	NA	NA	NA	NA	NA	NA	NA	NA	NA	NA	NA	NA	NA	NA	NA	NA	NA	NA
205	DE-0131196	2014	caro	nc	38	39	m	ml	tp	NaN	r	0	gb	0	0	0	0	0	0	0	0	0	0	0	NaN	NA	NA	NA	0	NA	0	NA	NA	NA	NA	NA	NA	NA	NA	NA	NA	NA	NA	NA	NA	NA	NA	NA	NA
206	DE-0131291	2013	NA	NA	62	63	m	B	o	NaN	r	0	gb	0	0	0	0	0	0	0	0	0	0	0	NaN	NA	NA	NA	0	NA	0	NA	NA	NA	NA	NA	NA	NA	NA	NA	NA	NA	NA	NA	NA	NA	NA	NA	NA
207	DE-0131321	2014	meth	tx	63	63	m	l	t	NaN	r	0	gb	0	0	0	0	0	0	0	0	0	0	0	NaN	NA	NA	NA	0	NA	0	NA	NA	NA	NA	NA	NA	NA	NA	NA	NA	NA	NA	NA	NA	NA	NA	NA	NA
208	DE-0131427	2014	mskcc	ny	63	63	m	l	f	NaN	r	0	gb	0	0	0	0	0	0	0	0	0	0	0	NaN	NA	NA	NA	0	NA	0	NA	NA	NA	NA	NA	NA	NA	NA	NA	NA	NA	NA	NA	NA	NA	NA	NA	NA
209	DE-0131620	2013	fh	fl	65	66	m	l	f	NaN	l	0	gb	0	0	0	0	0	0	0	0	0	0	0	NaN	NA	NA	NA	0	NA	0	NA	NA	NA	NA	NA	NA	NA	NA	NA	NA	NA	NA	NA	NA	NA	NA	NA	NA
210	DE-0131654	2012	nit	pa	61	62	m	l	t	NaN	r	0	gb	0	0	0	0	0	0	0	0	0	0	0	NaN	NA	NA	NA	0	NA	0	NA	NA	NA	NA	NA	NA	NA	NA	NA	NA	NA	NA	NA	NA	NA	NA	NA	NA
211	DE-0131657	2013	penn	pa	79	80	f	B	p	NaN	l	0	gb	0	0	1	0	0	0	0	0	0	0	0	NaN	NA	NA	NA	0	NA	0	NA	NA	NA	NA	NA	NA	NA	NA	NA	NA	NA	NA	NA	NA	NA	NA	NA	NA
212	DE-0131920	2014	ucsd	ca	54	54	f	B	f	NaN	l	0	gb	0	0	0	0	0	0	0	0	0	0	0	NaN	NA	NA	NA	NA	NA	NA	NA	NA	NA	NA	NA	NA	NA	NA	NA	NA	NA	NA	NA	NA	NA	NA	NA	NA
213	DE-0132007	2014	froed	wi	57	57	m	l	f	NaN	l	0	gb	1	0	0	0	0	0	0	0	0	0	0	NaN	NA	NA	NA	0	NA	0	NA	NA	NA	NA	NA	NA	NA	NA	NA	NA	NA	NA	NA	NA	NA	NA	NA	NA
214	DE-0132310	2013	NA	NA	66	66	m	l	t	NaN	r	0	gb	1	0	0	0	0	0	0	0	0	0	0	NaN	NA	NA	NA	0	NA	NA	NA	NA	NA	NA	NA	NA	NA	NA	NA	NA	NA	NA	NA	NA	NA	NA	NA	NA
215	DE-0132324	2014	gulf	fl	72	72	m	ST	BG	NaN	l	0	gb	0	0	0	0	0	0	0	0	0	0	0	NaN	NA	NA	NA	0	NA	0	NA	NA	NA	NA	NA	NA	NA	NA	NA	NA	NA	NA	NA	NA	NA	NA	NA	NA
216	DE-0132563	2013	jef	pa	58	59	m	l	t	NaN	r	0	gb	1	0	0	0	0	0	0	0	0	0	0	NaN	NA	NA	NA	0	NA	0	NA	NA	NA	NA	NA	NA	NA	NA	NA	NA	NA	NA	NA	NA	NA	NA	NA	NA
217	DE-0132613	2014	jef	pa	69	69	m	ml	tp	NaN	l	0	gb	0	0	0	0	0	0	0	0	0	0	0	NaN	NA	NA	NA	0	NA	0	NA	NA	NA	NA	NA	NA	NA	NA	NA	NA	NA	NA	NA	NA	NA	NA	NA	NA
218	DE-0132745	2014	ucsf	ca	63	63	f	l	f	NaN	l	0	gb	0	0	0	0	0	0	0	0	0	0	0	NaN	NA	NA	NA	0	NA	0	NA	NA	NA	NA	NA	NA	NA	NA	NA	NA	NA	NA	NA	NA	NA	NA	NA	NA
219	DE-0132775	2013	gros	ca	64	65	f	l	f	NaN	l	0	gb	0	1	0	0	0	0	0	0	0	0	0	NaN	NA	NA	NA	NA	NA	NA	NA	NA	NA	NA	NA	NA	NA	NA	NA	NA	NA	NA	NA	NA	NA	NA	NA	NA
220	DE-0132786	2012	ucsd	ca	38	39	f	l	t	NaN	l	0	gb	0	0	0	0	0	0	0	0	0	0	0	NaN	NA	NA	NA	NA	NA	NA	NA	NA	NA	NA	NA	NA	NA	NA	NA	NA	NA	NA	NA	NA	NA	NA	NA	NA
221	DE-0132814	2014	gt	dc	48	48	m	l	t	NaN	r	0	gb	0	0	0	0	0	0	0	0	0	0	0	NaN	NA	NA	NA	NA	NA	NA	NA	NA	NA	NA	NA	NA	NA	NA	NA	NA	NA	NA	NA	NA	NA	NA	NA	NA
222	DE-0132874	2013	plano	tx	71	71	m	l	o	NaN	l	0	gb	0	0	0	0	0	0	0	0	0	0	0	NaN	NA	NA	NA	0	NA	0	NA	NA	NA	NA	NA	NA	NA	NA	NA	NA	NA	NA	NA	NA	NA	NA	NA	NA
223	DE-0132958	2013	msj	wi	47	48	m	l	f	NaN	l	0	gb	0	1	0	0	1	0	0	0	0	0	0	NaN	NA	NA	NA	0	NA	0	NA	NA	NA	NA	NA	NA	NA	NA	NA	NA	NA	NA	NA	NA	NA	NA	NA	NA
224	DE-0132992	2013	jef	pa	43	43	f	l	p	NaN	l	0	gb	0	0	0	0	0	0	0	0	0	0	0	NaN	NA	NA	NA	0	NA	0	NA	NA	NA	NA	NA	NA	NA	NA	NA	NA	NA	NA	NA	NA	NA	NA	NA	NA
225	DE-0133101	2012	jef	pa	59	61	m	ST	ST	NaN	NA	0	gb	0	0	0	0	0	0	0	0	0	0	0	NaN	NA	NA	NA	0	NA	0	NA	NA	NA	NA	NA	NA	NA	NA	NA	NA	NA	NA	NA	NA	NA	NA	NA	NA
226	DE-0133149	2014	caro	nc	43	43	m	l	f	NaN	l	1	gb	0	0	0	0	0	0	0	0	0	0	0	NaN	NA	NA	NA	0	NA	0	NA	NA	NA	NA	NA	NA	NA	NA	NA	NA	NA	NA	NA	NA	NA	NA	NA	NA
227	DE-0133188	2013	NA	NA	59	59	m	l	t	NaN	l	0	gb	0	0	0	0	0	0	0	0	0	0	0	NaN	NA	NA	NA	0	NA	0	NA	NA	NA	NA	NA	NA	NA	NA	NA	NA	NA	NA	NA	NA	NA	NA	NA	NA
228	DE-0133338	2014	vv	co	68	68	m	B	B	NaN	b	0	gb	0	0	0	0	0	0	0	0	0	0	0	NaN	NA	NA	NA	0	NA	0	NA	NA	NA	NA	NA	NA	NA	NA	NA	NA	NA	NA	NA	NA	NA	NA	NA	NA
229	DE-0133383	2014	jef	pa	50	50	f	l	t	NaN	r	0	gb	0	0	0	0	0	0	0	0	0	0	0	NaN	NA	NA	NA	0	NA	0	NA	NA	NA	NA	NA	NA	NA	NA	NA	NA	NA	NA	NA	NA	NA	NA	NA	NA
230	DE-0133759	2013	nit	pa	44	45	f	l	f	NaN	l	0	gb	0	0	0	0	0	0	0	0	0	0	0	NaN	NA	NA	NA	0	NA	0	NA	NA	NA	NA	NA	NA	NA	NA	NA	NA	NA	NA	NA	NA	NA	NA	NA	NA
231	DE-0133776	2014	jef	pa	29	29	f	l	o	NaN	l	0	gb	0	0	0	0	0	0	0	0	0	0	0	NaN	NA	NA	NA	0	NA	0	NA	NA	NA	NA	NA	NA	NA	NA	NA	NA	NA	NA	NA	NA	NA	NA	NA	NA
232	DE-0133847	2014	ucsd	ca	64	64	m	l	f	NaN	l	0	gb	0	0	0	0	0	0	0	0	0	0	0	NaN	NA	NA	NA	NA	NA	NA	NA	NA	NA	NA	NA	NA	NA	NA	NA	NA	NA	NA	NA	NA	NA	NA	NA	NA
233	DE-0134130	2014	tex	tx	29	29	f	l	f	NaN	l	0	gb	0	0	0	0	0	0	0	0	0	0	0	NaN	NA	NA	NA	0	NA	0	NA	NA	NA	NA	NA	NA	NA	NA	NA	NA	NA	NA	NA	NA	NA	NA	NA	NA
234	DE-0134265	2014	fran	NA	71	71	m	l	p	NaN	l	0	gb	0	0	0	1	0	0	0	0	0	0	0	NaN	NA	NA	NA	NA	NA	NA	NA	NA	NA	NA	NA	NA	NA	NA	NA	NA	NA	NA	NA	NA	NA	NA	NA	NA
235	DE-0134280	2014	NA	NA	42	42	f	l	f	NaN	l	0	gb	0	0	0	0	0	0	0	0	0	0	0	NaN	NA	NA	NA	0	NA	0	NA	NA	NA	NA	NA	NA	NA	NA	NA	NA	NA	NA	NA	NA	NA	NA	NA	NA
236	DE-0134288	2013	upmc	pa	51	51	m	l	t	NaN	l	0	gb	0	0	1	0	0	0	0	0	0	0	0	NaN	NA	NA	NA	0	NA	0	NA	NA	NA	NA	NA	NA	NA	NA	NA	NA	NA	NA	NA	NA	NA	NA	NA	NA
237	DE-0134315	2014	scr	ca	76	76	m	l	p	NaN	r	0	gb	0	0	1	0	0	0	0	0	0	0	0	NaN	NA	NA	NA	NA	NA	NA	NA	NA	NA	NA	NA	NA	NA	NA	NA	NA	NA	NA	NA	NA	NA	NA	NA	NA
238	DE-0134317	2013	gros	ca	60	61	m	ml	tp	NaN	l	0	gb	0	0	0	0	0	0	0	0	0	0	0	NaN	NA	NA	NA	NA	NA	NA	NA	NA	NA	NA	NA	NA	NA	NA	NA	NA	NA	NA	NA	NA	NA	NA	NA	NA
239	DE-0134914	2014	NA	NA	51	51	f	ml	tp	NaN	l	0	gb	0	0	0	0	0	0	0	0	0	0	0	NaN	NA	NA	NA	0	NA	0	NA	NA	NA	NA	NA	NA	NA	NA	NA	NA	NA	NA	NA	NA	NA	NA	NA	NA
240	DE-0134950	2014	cc	oh	61	62	f	l	p	NaN	l	0	gb	0	0	0	0	0	0	0	0	0	0	0	NaN	NA	NA	NA	0	NA	0	NA	NA	NA	NA	NA	NA	NA	NA	NA	NA	NA	NA	NA	NA	NA	NA	NA	NA
241	DE-0135115	2014	NA	NA	6	6	m	B	B	NaN	NA	0	gb	1	0	0	0	0	0	0	0	0	0	0	NaN	NA	NA	NA	0	NA	0	NA	NA	NA	NA	NA	NA	NA	NA	NA	NA	NA	NA	NA	NA	NA	NA	NA	NA
242	DE-0135120	2014	shh	nv	59	59	f	B	B	NaN	NA	0	gb	0	0	1	0	0	0	0	0	0	0	0	NaN	NA	NA	NA	1	NA	0	NA	NA	NA	NA	NA	NA	NA	NA	NA	NA	NA	NA	NA	NA	NA	NA	NA	NA
243	DE-0135303	2013	smh	ca	53	54	m	ST	sCort	NaN	l	0	gb	0	0	1	0	0	0	0	0	0	0	0	NaN	NA	NA	NA	NA	NA	NA	NA	NA	NA	NA	NA	NA	NA	NA	NA	NA	NA	NA	NA	NA	NA	NA	NA	NA
244	DE-0135325	2014	meth	tx	53	53	m	l	t	NaN	r	0	gb	1	0	0	0	0	0	0	0	0	0	0	NaN	NA	NA	NA	0	NA	0	NA	NA	NA	NA	NA	NA	NA	NA	NA	NA	NA	NA	NA	NA	NA	NA	NA	NA
245	DE-0135469	2014	phmc	mi	51	51	m	B	B	NaN	NA	0	gb	0	0	0	0	0	0	0	0	0	0	0	NaN	NA	NA	NA	0	NA	0	NA	NA	NA	NA	NA	NA	NA	NA	NA	NA	NA	NA	NA	NA	NA	NA	NA	NA
246	DE-0135471	2014	fh	fl	20	20	m	IT	CB	NaN	r	0	gb	0	0	0	0	0	0	0	0	0	0	0	NaN	NA	NA	NA	0	NA	0	NA	NA	NA	NA	NA	NA	NA	NA	NA	NA	NA	NA	NA	NA	NA	NA	NA	NA
247	DE-0135477	2014	fh	fl	52	52	f	l	f	NaN	l	0	gb	0	0	0	0	0	0	0	0	0	0	0	NaN	NA	NA	NA	0	NA	0	NA	NA	NA	NA	NA	NA	NA	NA	NA	NA	NA	NA	NA	NA	NA	NA	NA	NA
248	DE-0135480	2014	fh	fl	68	68	f	ST	BG	NaN	NA	0	gb	0	0	0	0	0	0	0	0	0	0	0	NaN	NA	NA	NA	0	NA	0	NA	NA	NA	NA	NA	NA	NA	NA	NA	NA	NA	NA	NA	NA	NA	NA	NA	NA
249	DE-0135576	2014	penn	pa	29	29	m	l	p	NaN	l	0	gb	0	0	0	1	0	0	0	0	0	0	0	NaN	NA	NA	NA	0	NA	0	NA	NA	NA	NA	NA	NA	NA	NA	NA	NA	NA	NA	NA	NA	NA	NA	NA	NA
250	DE-0135577	NA	NA	NA	72	73	m	l	o	NaN	l	0	gb	0	0	0	0	0	0	0	0	0	0	0	NaN	NA	NA	NA	0	NA	0	NA	NA	NA	NA	NA	NA	NA	NA	NA	NA	NA	NA	NA	NA	NA	NA	NA	NA
251	DE-0135695	NA	NA	NA	47	47	m	l	t	NaN	l	0	gb	0	0	0	0	0	0	0	0	0	0	0	NaN	NA	NA	NA	0	NA	0	NA	NA	NA	NA	NA	NA	NA	NA	NA	NA	NA	NA	NA	NA	NA	NA	NA	NA
252	DE-0135768	2013	fh	fl	51	51	f	B	B	NaN	NA	0	gb	0	0	0	0	0	0	0	0	0	0	0	NaN	NA	NA	NA	0	NA	0	NA	NA	NA	NA	NA	NA	NA	NA	NA	NA	NA	NA	NA	NA	NA	NA	NA	NA
253	DE-0135807	2014	ucsd	ca	67	67	m	l	t	NaN	l	0	gb	0	0	0	0	0	0	0	0	0	0	0	NaN	NA	NA	NA	NA	NA	NA	NA	NA	NA	NA	NA	NA	NA	NA	NA	NA	NA	NA	NA	NA	NA	NA	NA	NA
254	DE-0135985	2014	luke	tx	48	48	f	ST	CH	NaN	l	0	gb	0	0	0	0	0	0	0	0	0	0	0	NaN	NA	NA	NA	0	NA	0	NA	NA	NA	NA	NA	NA	NA	NA	NA	NA	NA	NA	NA	NA	NA	NA	NA	NA
255	DE-0136005	2013	sv	ca	32	33	f	l	t	NaN	r	0	gb	0	0	0	0	0	1	0	0	0	0	0	NaN	NA	NA	NA	NA	NA	NA	NA	NA	NA	NA	NA	NA	NA	NA	NA	NA	NA	NA	NA	NA	NA	NA	NA	NA
256	DE-0136201	2014	ced	ca	33	33	f	l	t	NaN	r	0	gb	0	0	0	0	0	0	0	0	0	0	0	NaN	NA	NA	NA	0	NA	0	NA	NA	NA	NA	NA	NA	NA	NA	NA	NA	NA	NA	NA	NA	NA	NA	NA	NA
257	DE-0136400	2014	sjr	nj	23	24	m	l	p	NaN	l	0	gb	0	0	0	0	0	0	0	0	0	0	0	NaN	NA	NA	NA	0	NA	0	NA	NA	NA	NA	NA	NA	NA	NA	NA	NA	NA	NA	NA	NA	NA	NA	NA	NA
258	DE-0136434	2013	bhl	ky	69	70	f	l	t	NaN	r	0	gb	0	0	0	0	0	0	0	0	0	0	0	NaN	NA	NA	NA	NA	NA	NA	NA	NA	NA	NA	NA	NA	NA	NA	NA	NA	NA	NA	NA	NA	NA	NA	NA	NA
259	DE-0136496	2011	vand	tn	39	42	f	l	f	NaN	l	0	gb	0	0	0	1	0	0	0	0	0	0	0	NaN	NA	NA	NA	NA	NA	NA	NA	NA	NA	NA	NA	NA	NA	NA	NA	NA	NA	NA	NA	NA	NA	NA	NA	NA
260	DE-0136571	2014	meth	tx	65	65	f	l	t	NaN	r	0	gb	0	0	0	0	0	0	0	0	0	0	0	NaN	NA	NA	NA	0	NA	0	NA	NA	NA	NA	NA	NA	NA	NA	NA	NA	NA	NA	NA	NA	NA	NA	NA	NA
261	DE-0136654	2014	msl	tx	42	42	m	l	t	NaN	r	0	gb	0	0	0	0	0	0	0	0	0	0	0	NaN	NA	NA	NA	0	NA	0	NA	NA	NA	NA	NA	NA	NA	NA	NA	NA	NA	NA	NA	NA	NA	NA	NA	NA
262	DE-0136681	2014	jef	pa	63	63	f	l	p	NaN	r	0	gb	0	0	0	0	0	0	0	0	0	0	0	NaN	NA	NA	NA	0	NA	0	NA	NA	NA	NA	NA	NA	NA	NA	NA	NA	NA	NA	NA	NA	NA	NA	NA	NA
263	DE-0136729	2014	meth	tx	68	68	f	l	t	NaN	l	0	gb	0	0	0	0	0	0	0	0	0	0	0	NaN	NA	NA	NA	0	NA	0	NA	NA	NA	NA	NA	NA	NA	NA	NA	NA	NA	NA	NA	NA	NA	NA	NA	NA
264	DE-0136736	2012	fh	fl	75	77	m	l	t	NaN	l	0	gb	0	0	0	0	0	0	0	0	0	0	0	NaN	NA	NA	NA	0	NA	0	NA	NA	NA	NA	NA	NA	NA	NA	NA	NA	NA	NA	NA	NA	NA	NA	NA	NA
265	DE-0136738	2014	shand	fl	57	57	f	l	t	NaN	r	0	gb	0	0	0	0	0	0	0	0	0	0	0	NaN	NA	NA	NA	0	NA	0	NA	NA	NA	NA	NA	NA	NA	NA	NA	NA	NA	NA	NA	NA	NA	NA	NA	NA
266	DE-0136956	2013	penn	pa	61	62	m	B	B	NaN	l	0	gb	0	0	0	0	0	0	0	0	0	0	0	NaN	NA	NA	NA	0	NA	0	NA	NA	NA	NA	NA	NA	NA	NA	NA	NA	NA	NA	NA	NA	NA	NA	NA	NA
267	DE-0136964	2013	nit	pa	61	62	m	l	f	NaN	l	0	gb	0	0	1	0	0	0	0	0	0	0	0	NaN	NA	NA	NA	0	NA	0	NA	NA	NA	NA	NA	NA	NA	NA	NA	NA	NA	NA	NA	NA	NA	NA	NA	NA
268	DE-0137094	2014	kar	mi	54	54	f	l	p	NaN	r	0	gb	0	0	0	0	0	0	0	0	0	0	0	NaN	NA	NA	NA	0	NA	0	NA	NA	NA	NA	NA	NA	NA	NA	NA	NA	NA	NA	NA	NA	NA	NA	NA	NA
269	DE-0137096	2014	oak	mi	51	52	f	B	B	NaN	r	0	gb	0	1	0	0	0	0	0	0	0	0	0	desmoplasia	NA	NA	NA	0	NA	0	NA	NA	NA	NA	NA	NA	NA	NA	NA	NA	NA	NA	NA	NA	NA	NA	NA	NA
270	DE-0137182	2014	meth	tx	62	63	f	l	t	NaN	l	0	gb	0	0	0	0	0	0	0	0	0	0	0	NaN	NA	NA	NA	0	NA	0	NA	NA	NA	NA	NA	NA	NA	NA	NA	NA	NA	NA	NA	NA	NA	NA	NA	NA
271	DE-0137185	2014	meth	tx	29	29	f	ml	tp	NaN	r	0	gb	0	0	0	0	0	0	0	0	0	0	0	NaN	NA	NA	NA	0	NA	0	NA	NA	NA	NA	NA	NA	NA	NA	NA	NA	NA	NA	NA	NA	NA	NA	NA	NA
272	DE-0137202	2014	kar	mi	50	51	f	ml	ft	NaN	r	0	gb	0	0	0	0	0	0	0	0	0	0	0	NaN	NA	NA	NA	0	NA	0	NA	NA	NA	NA	NA	NA	NA	NA	NA	NA	NA	NA	NA	NA	NA	NA	NA	NA
273	DE-0137361	2014	chi	ar	66	66	m	B	B	NaN	l	0	gb	0	0	0	0	0	0	0	0	0	0	0	NaN	NA	NA	NA	0	NA	0	NA	NA	NA	NA	NA	NA	NA	NA	NA	NA	NA	NA	NA	NA	NA	NA	NA	NA
274	DE-0137381	2012	emc	pa	45	47	m	ml	tp	NaN	r	0	gb	0	0	0	0	0	0	1	0	0	0	1	NaN	NA	NA	NA	0	NA	0	NA	NA	NA	NA	NA	NA	NA	NA	NA	NA	NA	NA	NA	NA	NA	NA	NA	NA
275	DE-0137540	NA	NA	NA	51	56	f	ml	to	NaN	NA	0	gb	0	0	0	0	0	0	0	0	0	0	0	NaN	NA	NA	NA	0	NA	0	NA	NA	NA	NA	NA	NA	NA	NA	NA	NA	NA	NA	NA	NA	NA	NA	NA	NA
276	DE-0137582	NA	NA	NA	59	59	f	l	o	NaN	r	0	gb	0	0	0	0	0	0	0	0	0	0	0	NaN	NA	NA	NA	NA	NA	NA	NA	NA	NA	NA	NA	NA	NA	NA	NA	NA	NA	NA	NA	NA	NA	NA	NA	NA
277	DE-0137731	2014	fh	fl	44	45	m	SC	C	idem	c	0	gb	0	1	0	0	0	0	0	0	0	0	0	NaN	NA	NA	NA	0	NA	0	NA	NA	NA	NA	NA	NA	NA	NA	NA	NA	NA	NA	NA	NA	NA	NA	NA	NA
278	DE-0137813	2014	meth	tx	82	83	f	l	t	NaN	l	0	gb	0	0	0	0	0	0	0	0	0	0	0	NaN	NA	NA	NA	0	NA	0	NA	NA	NA	NA	NA	NA	NA	NA	NA	NA	NA	NA	NA	NA	NA	NA	NA	NA
279	DE-0137821	2014	ced	ca	60	60	f	l	t	NaN	r	0	gb	0	0	1	0	0	0	0	0	0	0	0	NaN	NA	NA	NA	0	NA	0	NA	NA	NA	NA	NA	NA	NA	NA	NA	NA	NA	NA	NA	NA	NA	NA	NA	NA
280	DE-0138151	2014	smh	ca	44	44	m	l	p	NaN	r	0	gb	0	0	1	0	0	0	0	0	0	0	0	NaN	NA	NA	NA	NA	1	NA	NA	NA	NA	NA	NA	NA	NA	NA	NA	NA	NA	NA	NA	NA	NA	NA	NA	NA
281	DE-0138380	2012	cc	oh	47	49	m	l	t	NaN	r	0	gb	0	0	1	0	0	0	0	0	0	0	0	NaN	NA	NA	NA	0	NA	0	NA	NA	NA	NA	NA	NA	NA	NA	NA	NA	NA	NA	NA	NA	NA	NA	NA	NA
282	DE-0138428	2014	scr	pa	45	45	m	ml	fp	NaN	l	0	gb	0	0	0	0	0	0	0	0	0	0	0	NaN	NA	NA	NA	NA	NA	NA	NA	NA	NA	NA	NA	NA	NA	NA	NA	NA	NA	NA	NA	NA	NA	NA	NA	NA
283	DE-0138530	2014	arl	tx	49	49	m	l	p	NaN	l	0	gb	0	0	1	0	0	0	0	0	0	0	0	NaN	NA	NA	NA	0	NA	0	NA	NA	NA	NA	NA	NA	NA	NA	NA	NA	NA	NA	NA	NA	NA	NA	NA	NA
284	DE-0138598	2014	luke	tx	55	55	m	B	PV	NaN	r	0	gb	0	0	1	0	0	0	0	0	0	0	0	NaN	NA	NA	NA	0	NA	0	NA	NA	NA	NA	NA	NA	NA	NA	NA	NA	NA	NA	NA	NA	NA	NA	NA	NA
285	DE-0138873	2014	meth	tx	69	69	m	ml	fp	NaN	l	0	gb	0	0	1	0	0	0	0	0	0	0	0	NaN	NA	NA	NA	0	NA	0	NA	NA	NA	NA	NA	NA	NA	NA	NA	NA	NA	NA	NA	NA	NA	NA	NA	NA
286	DE-0139010	2013	ucsd	ca	90	90	m	B	B	NaN	NA	0	gb	0	0	0	0	0	0	0	0	0	0	0	NaN	NA	NA	NA	NA	0	NA	NA	NA	NA	NA	NA	NA	NA	NA	NA	NA	NA	NA	NA	NA	NA	NA	NA	NA
287	DE-0139020	2014	jef	pa	52	52	f	l	p	NaN	r	0	gb	0	0	0	0	0	0	0	0	0	0	0	NaN	NA	NA	NA	0	NA	0	NA	NA	NA	NA	NA	NA	NA	NA	NA	NA	NA	NA	NA	NA	NA	NA	NA	NA
288	DE-0139052	2014	jef	pa	64	64	m	l	t	NaN	r	0	gb	0	0	0	0	0	0	0	0	0	0	0	NaN	NA	NA	NA	0	NA	0	NA	NA	NA	NA	NA	NA	NA	NA	NA	NA	NA	NA	NA	NA	NA	NA	NA	NA
289	DE-0139101	2014	jef	pa	29	29	m	l	f	NaN	r	0	gb	0	0	0	0	0	0	0	0	0	0	0	NaN	NA	NA	NA	0	NA	0	NA	NA	NA	NA	NA	NA	NA	NA	NA	NA	NA	NA	NA	NA	NA	NA	NA	NA
290	DE-0139305	2014	fhmc	fl	71	71	m	l	t	NaN	r	0	gb	0	0	0	0	0	0	0	0	0	0	0	NaN	NA	NA	NA	0	NA	0	NA	NA	NA	NA	NA	NA	NA	NA	NA	NA	NA	NA	NA	NA	NA	NA	NA	NA
291	DE-0139320	2014	jef	pa	57	57	f	l	f	NaN	r	0	gb	1	0	0	0	0	0	0	0	0	0	0	NaN	NA	NA	NA	0	NA	0	NA	NA	NA	NA	NA	NA	NA	NA	NA	NA	NA	NA	NA	NA	NA	NA	NA	NA
292	DE-0139336	2014	fhmc	fl	71	71	m	l	f	NaN	l	0	gb	0	0	1	0	0	0	0	0	0	0	0	NaN	NA	NA	NA	0	NA	0	NA	NA	NA	NA	NA	NA	NA	NA	NA	NA	NA	NA	NA	NA	NA	NA	NA	NA
293	DE-0139338	NA	fhmc	fl	37	37	m	ST	TH	NaN	l	0	gb	0	0	1	0	0	0	0	0	0	0	0	NaN	NA	NA	NA	0	NA	0	NA	NA	NA	NA	NA	NA	NA	NA	NA	NA	NA	NA	NA	NA	NA	NA	NA	NA
294	DE-0139407	2010	river	ca	25	30	m	l	f	NaN	r	0	gb	0	0	0	0	0	0	0	0	0	0	0	NaN	NA	NA	NA	NA	NA	NA	NA	NA	NA	NA	NA	NA	NA	NA	NA	NA	NA	NA	NA	NA	NA	NA	NA	NA
295	DE-0139559	2014	shore	md	60	60	f	l	f	NaN	NA	0	gb	0	0	0	0	0	0	0	0	0	0	0	NaN	NA	NA	NA	0	NA	0	NA	NA	NA	NA	NA	NA	NA	NA	NA	NA	NA	NA	NA	NA	NA	NA	NA	NA
296	DE-0139612	2014	scr	pa	63	63	m	l	t	NaN	l	0	gb	0	0	0	0	0	0	0	0	0	0	0	NaN	NA	NA	NA	NA	1	NA	NA	NA	NA	NA	NA	NA	NA	NA	NA	NA	NA	NA	NA	NA	NA	NA	NA	NA
297	DE-0139624	2011	lee	fl	69	71	m	l	t	NaN	NA	0	gb	0	0	1	0	0	0	0	0	0	0	0	NaN	NA	NA	NA	0	NA	0	NA	NA	NA	NA	NA	NA	NA	NA	NA	NA	NA	NA	NA	NA	NA	NA	NA	NA
298	DE-0139757	2014	ocala	fl	63	63	f	B	B	NaN	NA	0	gb	0	0	1	0	0	0	0	0	0	0	0	NaN	NA	NA	NA	0	NA	0	NA	NA	NA	NA	NA	NA	NA	NA	NA	NA	NA	NA	NA	NA	NA	NA	NA	NA
299	DE-0139758	NA	NA	NA	69	69	m	ml	ftp	NaN	l	0	gb	0	0	0	0	0	0	0	0	0	0	0	NaN	NA	NA	NA	0	NA	0	NA	NA	NA	NA	NA	NA	NA	NA	NA	NA	NA	NA	NA	NA	NA	NA	NA	NA
300	DE-0140069	2014	cfpa	fl	64	64	m	l	t	NaN	r	0	gb	0	0	0	0	0	0	0	0	0	0	0	NaN	NA	NA	NA	0	NA	0	NA	NA	NA	NA	NA	NA	NA	NA	NA	NA	NA	NA	NA	NA	NA	NA	NA	NA
301	DE-0140112	2014	fhmc	fl	78	78	m	l	f	NaN	r	0	gb	0	0	0	0	0	0	0	0	0	0	0	NaN	NA	NA	NA	0	NA	0	NA	NA	NA	NA	NA	NA	NA	NA	NA	NA	NA	NA	NA	NA	NA	NA	NA	NA
302	DE-0140179	2014	fh	fl	57	57	m	l	f	NaN	r	0	gb	0	0	1	0	0	0	0	0	0	0	0	NaN	NA	NA	NA	0	NA	0	NA	NA	NA	NA	NA	NA	NA	NA	NA	NA	NA	NA	NA	NA	NA	NA	NA	NA
303	DE-0140248	2014	chi	tx	74	74	m	ml	ft	NaN	l	0	gb	0	0	0	0	0	0	0	0	0	0	0	NaN	NA	NA	NA	0	NA	0	NA	NA	NA	NA	NA	NA	NA	NA	NA	NA	NA	NA	NA	NA	NA	NA	NA	NA
304	DE-0140315	NA	NA	NA	69	69	f	l	f	NaN	l	0	gb	0	0	1	0	0	0	0	0	0	0	0	NaN	NA	NA	NA	NA	NA	NA	NA	NA	NA	NA	NA	NA	NA	NA	NA	NA	NA	NA	NA	NA	NA	NA	NA	NA
305	DE-0140328	2014	scot	az	84	84	m	l	p	NaN	l	0	gb	0	0	0	0	0	0	0	0	0	0	0	NaN	NA	NA	NA	NA	NA	NA	NA	NA	NA	NA	NA	NA	NA	NA	NA	NA	NA	NA	NA	NA	NA	NA	NA	NA
306	DE-0140437	NA	NA	NA	50	50	m	ST	TH	NaN	r	0	gb	0	0	1	0	0	0	0	0	0	0	0	NaN	NA	NA	NA	0	NA	0	NA	NA	NA	NA	NA	NA	NA	NA	NA	NA	NA	NA	NA	NA	NA	NA	NA	NA
307	DE-0140551	NA	NA	NA	77	78	m	ml	ft	NaN	r	0	gb	0	0	0	0	0	0	0	0	0	0	0	NaN	NA	NA	NA	NA	0	NA	NA	NA	NA	NA	NA	NA	NA	NA	NA	NA	NA	NA	NA	NA	NA	NA	NA	NA
308	DE-0140564	NA	NA	NA	67	68	f	l	p	NaN	l	0	gb	1	0	0	0	0	0	0	0	0	0	0	pleomorphism	NA	NA	NA	0	NA	0	NA	NA	NA	NA	NA	NA	NA	NA	NA	NA	NA	NA	NA	NA	NA	NA	NA	NA
309	DE-0140756	NA	NA	NA	58	58	m	l	o	NaN	r	0	gb	0	0	1	0	0	0	0	0	0	0	0	NaN	NA	NA	NA	NA	NA	NA	NA	NA	NA	NA	NA	NA	NA	NA	NA	NA	NA	NA	NA	NA	NA	NA	NA	NA
310	DE-0140899	NA	NA	NA	26	26	m	l	f	NaN	l	1	gb	1	0	0	0	0	0	0	0	0	0	0	NaN	NA	NA	NA	0	NA	0	NA	NA	NA	NA	NA	NA	NA	NA	NA	NA	NA	NA	NA	NA	NA	NA	NA	NA
311	DE-0141085	NA	NA	NA	45	45	f	l	p	NaN	l	0	gb	0	0	1	0	0	0	0	0	0	0	0	NaN	NA	NA	NA	0	NA	0	NA	NA	NA	NA	NA	NA	NA	NA	NA	NA	NA	NA	NA	NA	NA	NA	NA	NA
312	DE-0141181	NA	NA	NA	26	26	m	ml	fp	NaN	l	1	gb	1	0	0	0	0	0	0	0	0	0	0	NaN	NA	NA	NA	0	NA	0	NA	NA	NA	NA	NA	NA	NA	NA	NA	NA	NA	NA	NA	NA	NA	NA	NA	NA
313	DE-0141187	NA	NA	NA	74	74	f	B	B	NaN	l	0	gb	0	0	0	0	0	0	0	0	0	0	0	NaN	NA	NA	NA	0	NA	0	NA	NA	NA	NA	NA	NA	NA	NA	NA	NA	NA	NA	NA	NA	NA	NA	NA	NA
314	DE-0141192	NA	NA	NA	64	64	m	l	f	NaN	r	0	gb	0	0	1	0	0	0	0	0	0	0	0	NaN	NA	NA	NA	0	NA	0	NA	NA	NA	NA	NA	NA	NA	NA	NA	NA	NA	NA	NA	NA	NA	NA	NA	NA
315	DE-0141780	NA	NA	NA	57	57	f	l	p	NaN	l	0	gb	0	0	1	0	0	0	0	0	0	0	0	NaN	NA	NA	NA	0	NA	0	NA	NA	NA	NA	NA	NA	NA	NA	NA	NA	NA	NA	NA	NA	NA	NA	NA	NA
316	DE-0141962	NA	NA	NA	74	74	m	l	f	NaN	r	0	gb	0	0	0	0	0	0	0	0	0	0	0	NaN	NA	NA	NA	0	NA	0	NA	NA	NA	NA	NA	NA	NA	NA	NA	NA	NA	NA	NA	NA	NA	NA	NA	NA
317	DE-0142722	NA	NA	NA	66	66	m	l	t	NaN	l	0	gb	0	0	0	0	0	0	0	0	0	0	0	NaN	NA	NA	NA	0	NA	0	NA	NA	NA	NA	NA	NA	NA	NA	NA	NA	NA	NA	NA	NA	NA	NA	NA	NA
318	DE-0142862	NA	NA	NA	55	57	m	l	f	NaN	l	0	gb	0	0	0	0	0	0	0	0	0	0	0	NaN	NA	NA	NA	0	NA	0	NA	NA	NA	NA	NA	NA	NA	NA	NA	NA	NA	NA	NA	NA	NA	NA	NA	NA
319	DE-0142865	NA	NA	NA	74	74	m	l	p	NaN	r	0	gb	0	0	0	0	0	0	0	0	0	0	0	NaN	NA	NA	NA	NA	NA	NA	NA	NA	NA	NA	NA	NA	NA	NA	NA	NA	NA	NA	NA	NA	NA	NA	NA	NA
320	DE-0142869	NA	NA	NA	73	73	m	l	p	NaN	r	0	gb	0	0	0	0	0	0	0	0	0	0	0	NaN	NA	NA	NA	NA	NA	NA	NA	NA	NA	NA	NA	NA	NA	NA	NA	NA	NA	NA	NA	NA	NA	NA	NA	NA
321	DE-0142921	NA	NA	NA	60	66	f	B	B	NaN	NA	0	gb	0	0	1	0	0	0	0	0	0	0	0	NaN	NA	NA	NA	0	NA	0	NA	NA	NA	NA	NA	NA	NA	NA	NA	NA	NA	NA	NA	NA	NA	NA	NA	NA
322	DE-0143046	NA	NA	NA	60	61	f	l	t	NaN	l	0	gb	0	0	0	0	0	0	0	0	0	0	0	NaN	NA	NA	NA	NA	NA	NA	NA	NA	NA	NA	NA	NA	NA	NA	NA	NA	NA	NA	NA	NA	NA	NA	NA	NA
323	DE-0143047	NA	NA	NA	80	80	m	l	f	NaN	l	0	gb	0	0	0	0	0	0	0	0	0	0	0	NaN	NA	NA	NA	NA	NA	NA	NA	NA	NA	NA	NA	NA	NA	NA	NA	NA	NA	NA	NA	NA	NA	NA	NA	NA
324	DE-0143084	NA	NA	NA	49	51	m	l	p	NaN	r	0	gb	0	0	0	0	0	0	0	0	0	0	0	NaN	NA	NA	NA	0	NA	0	NA	NA	NA	NA	NA	NA	NA	NA	NA	NA	NA	NA	NA	NA	NA	NA	NA	NA
325	DE-0143145	NA	NA	NA	49	51	m	l	f	NaN	l	0	gb	0	0	0	0	0	0	0	0	0	0	0	NaN	NA	NA	NA	NA	NA	NA	NA	NA	NA	NA	NA	NA	NA	NA	NA	NA	NA	NA	NA	NA	NA	NA	NA	NA
326	DE-0143150	NA	NA	NA	67	67	m	l	f	NaN	r	0	gb	0	0	1	0	0	0	0	0	0	0	0	NaN	NA	NA	NA	NA	NA	NA	NA	NA	NA	NA	NA	NA	NA	NA	NA	NA	NA	NA	NA	NA	NA	NA	NA	NA
327	DE-0143279	NA	NA	NA	52	52	m	l	t	NaN	l	0	gb	0	0	0	0	0	0	0	0	0	0	0	NaN	NA	NA	NA	0	NA	0	NA	NA	NA	NA	NA	NA	NA	NA	NA	NA	NA	NA	NA	NA	NA	NA	NA	NA
328	DE-0143635	NA	NA	NA	25	25	f	B	B	NaN	NA	0	gb	0	0	0	0	0	0	0	0	0	0	0	NaN	NA	NA	NA	NA	NA	NA	NA	NA	NA	NA	NA	NA	NA	NA	NA	NA	NA	NA	NA	NA	NA	NA	NA	NA
329	DE-0143765	NA	NA	NA	59	60	m	l	f	NaN	l	0	gb	0	0	0	0	0	0	0	0	0	0	0	NaN	NA	NA	NA	NA	NA	NA	NA	NA	NA	NA	NA	NA	NA	NA	NA	NA	NA	NA	NA	NA	NA	NA	NA	NA
330	DE-0143851	NA	NA	NA	42	44	m	l	p	NaN	r	0	gb	0	0	1	0	0	0	0	0	0	0	0	NaN	NA	NA	NA	NA	NA	NA	NA	NA	NA	NA	NA	NA	NA	NA	NA	NA	NA	NA	NA	NA	NA	NA	NA	NA
331	DE-0143916	NA	NA	NA	26	28	f	l	f	NaN	b	0	gb	0	0	0	0	0	0	0	0	0	0	0	NaN	NA	NA	NA	NA	NA	NA	NA	NA	NA	NA	NA	NA	NA	NA	NA	NA	NA	NA	NA	NA	NA	NA	NA	NA
332	DE-0144025	NA	NA	NA	50	50	m	l	f	NaN	l	0	gb	0	0	0	0	0	0	0	0	0	0	0	NaN	NA	NA	NA	0	NA	0	NA	NA	NA	NA	NA	NA	NA	NA	NA	NA	NA	NA	NA	NA	NA	NA	NA	NA
333	DE-0144457	NA	NA	NA	79	79	m	l	t	NaN	r	0	gb	0	0	0	0	0	0	0	0	0	0	0	NaN	NA	NA	NA	0	NA	0	NA	NA	NA	NA	NA	NA	NA	NA	NA	NA	NA	NA	NA	NA	NA	NA	NA	NA
334	DE-0144470	NA	NA	NA	59	61	m	l	p	NaN	r	0	gb	0	0	1	0	0	0	0	0	0	0	0	NaN	NA	NA	NA	0	NA	0	NA	NA	NA	NA	NA	NA	NA	NA	NA	NA	NA	NA	NA	NA	NA	NA	NA	NA
335	DE-0144503	NA	NA	NA	52	52	m	l	f	NaN	l	0	gb	0	0	1	0	0	0	0	0	0	0	0	NaN	NA	NA	NA	NA	NA	NA	NA	NA	NA	NA	NA	NA	NA	NA	NA	NA	NA	NA	NA	NA	NA	NA	NA	NA
336	DE-0144507	NA	NA	NA	63	63	m	l	t	NaN	r	0	gb	1	0	0	0	0	0	0	0	0	0	0	NaN	NA	NA	NA	0	NA	0	NA	NA	NA	NA	NA	NA	NA	NA	NA	NA	NA	NA	NA	NA	NA	NA	NA	NA
337	DE-0144590	NA	NA	NA	38	38	m	l	f	NaN	r	0	gb	0	0	0	0	0	0	0	0	0	0	0	NaN	NA	NA	NA	0	NA	0	NA	NA	NA	NA	NA	NA	NA	NA	NA	NA	NA	NA	NA	NA	NA	NA	NA	NA
338	DE-0145212	NA	NA	NA	62	62	m	l	t	NaN	r	0	gb	0	0	0	0	0	0	0	0	0	0	0	NaN	NA	NA	NA	NA	NA	NA	NA	NA	NA	NA	NA	NA	NA	NA	NA	NA	NA	NA	NA	NA	NA	NA	NA	NA
339	DE-0145243	NA	NA	NA	69	72	f	l	t	NaN	r	0	gb	1	0	0	0	0	0	0	0	0	1	0	NaN	NA	NA	NA	0	NA	0	NA	NA	NA	NA	NA	NA	NA	NA	NA	NA	NA	NA	NA	NA	NA	NA	NA	NA
340	DE-0145245	NA	NA	NA	57	57	m	ml	ft	NaN	r	0	gb	1	0	0	0	0	0	0	0	0	0	0	NaN	NA	NA	NA	0	NA	0	NA	NA	NA	NA	NA	NA	NA	NA	NA	NA	NA	NA	NA	NA	NA	NA	NA	NA
341	DE-0145267	NA	NA	NA	61	65	f	l	f	NaN	l	0	gb	0	0	0	0	0	0	0	0	0	0	0	NaN	NA	NA	NA	0	NA	0	NA	NA	NA	NA	NA	NA	NA	NA	NA	NA	NA	NA	NA	NA	NA	NA	NA	NA
342	DE-0145358	NA	NA	NA	72	72	m	l	t	NaN	r	1	gb	0	0	0	0	0	0	0	0	0	0	0	spindle-cell component	NA	NA	NA	0	NA	0	NA	NA	NA	NA	NA	NA	NA	NA	NA	NA	NA	NA	NA	NA	NA	NA	NA	NA
343	DE-0145882	NA	NA	NA	62	63	m	l	t	NaN	r	0	gb	0	0	0	0	0	0	0	0	0	0	0	NaN	NA	NA	NA	0	NA	0	NA	NA	NA	NA	NA	NA	NA	NA	NA	NA	NA	NA	NA	NA	NA	NA	NA	NA
344	DE-0145884	NA	NA	NA	53	54	f	l	f	NaN	r	0	gb	0	0	1	0	0	0	0	0	0	0	0	NaN	NA	NA	NA	0	NA	0	NA	NA	NA	NA	NA	NA	NA	NA	NA	NA	NA	NA	NA	NA	NA	NA	NA	NA
345	DE-0145890	NA	NA	NA	56	56	m	l	f	NaN	r	0	gb	0	0	0	0	0	0	0	0	0	0	0	NaN	NA	NA	NA	0	NA	0	NA	NA	NA	NA	NA	NA	NA	NA	NA	NA	NA	NA	NA	NA	NA	NA	NA	NA
346	DE-0145892	NA	NA	NA	46	46	m	B	B	NaN	r	0	gb	0	0	0	0	0	0	0	0	0	0	0	NaN	NA	NA	NA	0	NA	0	NA	NA	NA	NA	NA	NA	NA	NA	NA	NA	NA	NA	NA	NA	NA	NA	NA	NA
347	DE-0145894	NA	NA	NA	59	59	m	l	t	NaN	r	0	gb	0	1	0	0	0	0	0	0	0	0	0	NaN	NA	NA	NA	0	NA	0	NA	NA	NA	NA	NA	NA	NA	NA	NA	NA	NA	NA	NA	NA	NA	NA	NA	NA
348	DE-0146317	NA	NA	NA	44	44	f	B	B	NaN	NA	0	gb	0	0	0	0	0	0	0	0	0	0	0	NaN	NA	NA	NA	0	NA	0	NA	NA	NA	NA	NA	NA	NA	NA	NA	NA	NA	NA	NA	NA	NA	NA	NA	NA
349	DE-0146429	NA	NA	NA	52	55	m	l	f	NaN	l	0	gb	0	0	0	0	0	0	0	0	0	0	0	NaN	NA	NA	NA	0	NA	0	NA	NA	NA	NA	NA	NA	NA	NA	NA	NA	NA	NA	NA	NA	NA	NA	NA	NA
350	DE-0146451	NA	NA	NA	43	44	m	B	B	NaN	NA	0	gb	0	0	1	0	0	0	0	0	0	0	0	NaN	NA	NA	NA	0	NA	0	NA	NA	NA	NA	NA	NA	NA	NA	NA	NA	NA	NA	NA	NA	NA	NA	NA	NA
351	DE-0146454	NA	NA	NA	52	52	m	l	f	NaN	l	0	gb	0	0	0	0	0	0	0	0	0	0	0	NaN	NA	NA	NA	0	NA	0	NA	NA	NA	NA	NA	NA	NA	NA	NA	NA	NA	NA	NA	NA	NA	NA	NA	NA
352	DE-0146524	NA	NA	NA	64	65	m	l	f	NaN	l	0	gb	0	0	0	0	0	0	0	0	0	0	0	NaN	NA	NA	NA	0	NA	0	NA	NA	NA	NA	NA	NA	NA	NA	NA	NA	NA	NA	NA	NA	NA	NA	NA	NA
353	DE-0146546	NA	NA	NA	67	67	f	l	p	NaN	l	0	gb	0	0	0	0	0	0	0	0	0	0	0	NaN	NA	NA	NA	0	NA	0	NA	NA	NA	NA	NA	NA	NA	NA	NA	NA	NA	NA	NA	NA	NA	NA	NA	NA
354	DE-0146655	NA	NA	NA	61	61	m	B	B	NaN	NA	0	gb	0	0	0	0	0	0	0	0	0	0	0	NaN	NA	NA	NA	0	NA	0	NA	NA	NA	NA	NA	NA	NA	NA	NA	NA	NA	NA	NA	NA	NA	NA	NA	NA
355	DE-0146665	NA	NA	NA	72	72	f	l	t	NaN	r	0	gb	0	0	0	0	0	0	0	0	0	0	0	NaN	NA	NA	NA	0	NA	0	NA	NA	NA	NA	NA	NA	NA	NA	NA	NA	NA	NA	NA	NA	NA	NA	NA	NA
356	DE-0146872	NA	NA	NA	53	53	m	l	f	NaN	l	0	gb	0	0	0	0	0	0	0	0	0	0	0	NaN	NA	NA	NA	0	NA	0	NA	NA	NA	NA	NA	NA	NA	NA	NA	NA	NA	NA	NA	NA	NA	NA	NA	NA
357	DE-0146885	NA	NA	NA	69	69	m	ml	ft	NaN	r	0	gb	0	0	0	0	0	0	0	0	0	0	0	NaN	NA	NA	NA	0	NA	0	NA	NA	NA	NA	NA	NA	NA	NA	NA	NA	NA	NA	NA	NA	NA	NA	NA	NA
358	DE-0147335	NA	NA	NA	80	80	m	l	p	NaN	r	0	gb	0	0	0	0	0	0	0	0	0	0	0	NaN	NA	NA	NA	0	NA	0	NA	NA	NA	NA	NA	NA	NA	NA	NA	NA	NA	NA	NA	NA	NA	NA	NA	NA
359	DE-0147424	NA	NA	NA	52	53	f	l	f	NaN	l	0	gb	1	1	0	0	0	0	0	0	0	0	0	NaN	NA	NA	NA	0	NA	0	NA	NA	NA	NA	NA	NA	NA	NA	NA	NA	NA	NA	NA	NA	NA	NA	NA	NA
360	DE-0147551	NA	NA	NA	76	81	f	l	f	NaN	r	0	gb	0	0	1	0	0	0	0	1	0	0	0	NaN	NA	NA	NA	NA	NA	NA	NA	NA	NA	NA	NA	NA	NA	NA	NA	NA	NA	NA	NA	NA	NA	NA	NA	NA
361	DE-0147583	NA	NA	NA	11	11	f	ST	TH	NaN	l	0	gb	0	0	1	0	0	0	0	0	0	0	0	NaN	NA	NA	NA	NA	NA	NA	NA	NA	NA	NA	NA	NA	NA	NA	NA	NA	NA	NA	NA	NA	NA	NA	NA	NA
362	DE-0147593	NA	NA	NA	48	48	m	l	f	NaN	r	0	gb	0	0	0	0	0	0	0	0	0	0	0	NaN	NA	NA	NA	0	NA	0	NA	NA	NA	NA	NA	NA	NA	NA	NA	NA	NA	NA	NA	NA	NA	NA	NA	NA
363	DE-0147651	NA	NA	NA	78	78	m	l	p	NaN	r	1	gb	0	0	0	0	0	0	0	0	0	0	0	NaN	NA	NA	NA	0	NA	0	NA	NA	NA	NA	NA	NA	NA	NA	NA	NA	NA	NA	NA	NA	NA	NA	NA	NA
364	DE-0147656	NA	NA	NA	28	28	m	NNS	subCut	rt	r	1	gb	0	0	0	0	0	0	0	0	0	0	0	NaN	NA	NA	NA	0	NA	0	NA	NA	NA	NA	NA	NA	NA	NA	NA	NA	NA	NA	NA	NA	NA	NA	NA	NA
365	DE-0147730	NA	NA	NA	44	44	m	ST	BGT	NaN	r	0	gb	0	0	0	0	0	0	0	0	0	0	0	NaN	NA	NA	NA	0	NA	0	NA	NA	NA	NA	NA	NA	NA	NA	NA	NA	NA	NA	NA	NA	NA	NA	NA	NA
366	DE-0147813	NA	NA	NA	46	46	m	ml	ft	NaN	r	0	gb	1	0	0	0	0	0	0	0	0	0	0	NaN	NA	NA	NA	0	NA	0	NA	NA	NA	NA	NA	NA	NA	NA	NA	NA	NA	NA	NA	NA	NA	NA	NA	NA
367	DE-0147910	NA	NA	NA	56	58	m	l	t	NaN	l	0	gb	0	0	0	0	0	0	0	0	0	0	0	NaN	NA	NA	NA	0	NA	0	NA	NA	NA	NA	NA	NA	NA	NA	NA	NA	NA	NA	NA	NA	NA	NA	NA	NA
368	DE-0148047	NA	NA	NA	25	25	m	l	t	NaN	l	0	gb	0	0	0	0	0	0	0	0	0	0	0	NaN	NA	NA	NA	0	NA	0	NA	NA	NA	NA	NA	NA	NA	NA	NA	NA	NA	NA	NA	NA	NA	NA	NA	NA
369	DE-0148068	NA	NA	NA	75	75	m	l	p	NaN	r	0	gb	0	0	0	0	0	0	0	0	0	0	0	NaN	NA	NA	NA	NA	NA	NA	NA	NA	NA	NA	NA	NA	NA	NA	NA	NA	NA	NA	NA	NA	NA	NA	NA	NA
370	DE-0148162	NA	NA	NA	70	70	m	l	f	NaN	r	0	gb	0	0	1	0	0	0	0	0	0	0	0	NaN	NA	NA	NA	NA	NA	NA	NA	NA	NA	NA	NA	NA	NA	NA	NA	NA	NA	NA	NA	NA	NA	NA	NA	NA
371	DE-0148181	NA	NA	NA	57	57	f	B	B	NaN	NA	0	gb	1	0	0	0	0	0	0	0	0	0	0	NaN	NA	NA	NA	0	NA	0	NA	NA	NA	NA	NA	NA	NA	NA	NA	NA	NA	NA	NA	NA	NA	NA	NA	NA
372	DE-0148251	NA	NA	NA	59	59	f	l	f	NaN	r	0	gb	0	0	0	0	0	0	0	0	0	0	0	NaN	NA	NA	NA	0	NA	0	NA	NA	NA	NA	NA	NA	NA	NA	NA	NA	NA	NA	NA	NA	NA	NA	NA	NA
373	DE-0148252	NA	NA	NA	61	61	m	ml	tp	NaN	l	0	gb	0	0	0	0	0	0	0	0	0	0	0	NaN	NA	NA	NA	0	NA	0	NA	NA	NA	NA	NA	NA	NA	NA	NA	NA	NA	NA	NA	NA	NA	NA	NA	NA
374	DE-0148588	NA	NA	NA	43	43	m	l	p	NaN	r	0	gb	0	0	0	0	0	0	0	0	0	0	0	NaN	NA	NA	NA	NA	NA	NA	NA	NA	NA	NA	NA	NA	NA	NA	NA	NA	NA	NA	NA	NA	NA	NA	NA	NA
375	DE-0148659	NA	NA	NA	71	71	m	l	p	NaN	l	0	gb	1	0	0	0	0	0	0	0	0	0	0	NaN	NA	NA	NA	0	NA	0	NA	NA	NA	NA	NA	NA	NA	NA	NA	NA	NA	NA	NA	NA	NA	NA	NA	NA
376	DE-0148696	NA	NA	NA	55	55	f	l	p	NaN	r	0	gb	0	0	0	0	0	0	0	0	0	0	0	NaN	NA	NA	NA	NA	NA	NA	NA	NA	NA	NA	NA	NA	NA	NA	NA	NA	NA	NA	NA	NA	NA	NA	NA	NA
377	DE-0149029	NA	NA	NA	58	61	f	l	p	NaN	l	0	gb	0	0	0	0	0	0	0	0	0	0	0	NaN	NA	NA	NA	0	NA	0	NA	NA	NA	NA	NA	NA	NA	NA	NA	NA	NA	NA	NA	NA	NA	NA	NA	NA
378	DE-0149041	NA	NA	NA	50	53	m	SC	SC	NaN	c	0	gb	0	0	1	0	0	0	0	1	0	0	1	NaN	NA	NA	NA	NA	NA	0	NA	NA	NA	NA	NA	NA	NA	NA	NA	NA	NA	NA	NA	NA	NA	NA	NA	NA
379	DE-0149434	NA	NA	NA	22	23	m	B	B	NaN	NA	0	gb	0	0	0	0	0	0	0	0	0	0	0	NaN	NA	NA	NA	0	NA	0	NA	NA	NA	NA	NA	NA	NA	NA	NA	NA	NA	NA	NA	NA	NA	NA	NA	NA
380	DE-0149461	NA	NA	NA	26	26	m	l	f	NaN	r	0	gb	0	0	0	0	0	1	0	0	0	0	0	NaN	NA	NA	NA	0	NA	0	NA	NA	NA	NA	NA	NA	NA	NA	NA	NA	NA	NA	NA	NA	NA	NA	NA	NA
381	DE-0149620	NA	NA	NA	53	53	m	l	t	NaN	b	0	gb	1	0	0	0	0	0	0	0	0	0	0	NaN	NA	NA	NA	0	NA	0	NA	NA	NA	NA	NA	NA	NA	NA	NA	NA	NA	NA	NA	NA	NA	NA	NA	NA
382	DE-0150074	NA	NA	NA	64	64	f	l	t	NaN	r	0	gb	0	0	0	0	0	0	0	0	0	0	0	NaN	NA	NA	NA	1	NA	0	NA	NA	NA	NA	NA	NA	NA	NA	NA	NA	NA	NA	NA	NA	NA	NA	NA	NA
383	DE-0150198	NA	NA	NA	67	67	f	l	p	NaN	l	0	gb	0	0	0	0	0	0	0	0	0	0	0	NaN	NA	NA	NA	0	NA	0	NA	NA	NA	NA	NA	NA	NA	NA	NA	NA	NA	NA	NA	NA	NA	NA	NA	NA
384	DE-0150211	NA	NA	NA	60	60	m	l	f	NaN	l	0	gb	0	0	1	0	0	0	0	0	0	0	0	NaN	NA	NA	NA	0	NA	0	NA	NA	NA	NA	NA	NA	NA	NA	NA	NA	NA	NA	NA	NA	NA	NA	NA	NA
385	DE-0150219	NA	NA	NA	72	72	f	l	f	NaN	l	0	gb	0	0	0	0	0	0	0	0	0	0	0	NaN	NA	NA	NA	NA	NA	NA	NA	NA	NA	NA	NA	NA	NA	NA	NA	NA	NA	NA	NA	NA	NA	NA	NA	NA
386	DE-0150235	NA	NA	NA	60	60	f	l	o	NaN	r	1	gb	0	0	0	0	0	0	0	0	0	0	0	NaN	NA	NA	NA	0	NA	0	NA	NA	NA	NA	NA	NA	NA	NA	NA	NA	NA	NA	NA	NA	NA	NA	NA	NA
387	DE-0150616	NA	NA	NA	73	73	m	l	f	NaN	r	0	gb	0	0	1	0	0	0	0	0	0	0	0	NaN	9	0	0	0	NA	0	NA	NA	NA	NA	NA	NA	NA	NA	NA	NA	NA	NA	NA	NA	NA	NA	NA	NA
388	DE-0150672	NA	NA	NA	60	60	m	ST	THP	NaN	l	0	gb	0	0	0	0	0	0	0	0	0	0	0	NaN	NA	NA	NA	NA	NA	NA	NA	NA	NA	NA	NA	NA	NA	NA	NA	NA	NA	NA	NA	NA	NA	NA	NA	NA
389	DE-0150691	NA	NA	NA	61	63	m	l	t	NaN	r	0	gb	0	0	0	0	0	0	0	0	0	0	0	NaN	NA	NA	NA	NA	NA	NA	NA	NA	NA	NA	NA	NA	NA	NA	NA	NA	NA	NA	NA	NA	NA	NA	NA	NA
390	DE-0150693	NA	NA	NA	78	78	m	l	f	NaN	r	0	gb	0	0	1	0	0	0	0	0	0	0	0	NaN	NA	NA	NA	0	NA	0	NA	NA	NA	NA	NA	NA	NA	NA	NA	NA	NA	NA	NA	NA	NA	NA	NA	NA
391	DE-0150741	NA	NA	NA	26	27	m	l	o	NaN	r	0	gb	0	0	0	0	0	0	0	0	0	0	0	NaN	NA	NA	NA	0	NA	0	NA	NA	NA	NA	NA	NA	NA	NA	NA	NA	NA	NA	NA	NA	NA	NA	NA	NA
392	DE-0150767	NA	NA	NA	66	66	m	l	p	NaN	r	0	gb	0	0	1	0	0	0	0	0	0	0	0	NaN	NA	NA	NA	NA	NA	NA	NA	NA	NA	NA	NA	NA	NA	NA	NA	NA	NA	NA	NA	NA	NA	NA	NA	NA
393	DE-0150837	NA	NA	NA	71	71	m	l	t	NaN	r	0	gb	0	0	0	0	0	0	0	0	0	0	0	NaN	NA	NA	NA	0	NA	0	NA	NA	NA	NA	NA	NA	NA	NA	NA	NA	NA	NA	NA	NA	NA	NA	NA	NA
394	DE-0150859	NA	NA	NA	67	67	m	B	B	NaN	NA	0	gb	0	0	0	0	0	0	0	0	0	0	0	NaN	NA	NA	NA	0	NA	NA	NA	NA	NA	NA	NA	NA	NA	NA	NA	NA	NA	NA	NA	NA	NA	NA	NA	NA
395	DE-0150883	NA	NA	NA	74	74	f	l	t	NaN	l	0	gb	0	0	1	0	0	0	0	0	0	0	0	NaN	NA	NA	NA	NA	0	NA	NA	NA	NA	NA	NA	NA	NA	NA	NA	NA	NA	NA	NA	NA	NA	NA	NA	NA
396	DE-0150947	NA	NA	NA	56	56	m	l	t	NaN	NA	0	gb	0	0	0	0	0	0	0	0	0	0	0	NaN	NA	NA	NA	NA	NA	0	NA	NA	NA	NA	NA	NA	NA	NA	NA	NA	NA	NA	NA	NA	NA	NA	NA	NA
397	DE-0151061	NA	NA	NA	40	41	m	l	p	NaN	r	0	gb	0	0	0	1	0	1	0	0	0	0	0	NaN	NA	NA	NA	0	NA	0	NA	NA	NA	NA	NA	NA	NA	NA	NA	NA	NA	NA	NA	NA	NA	NA	NA	NA
398	DE-0151078	NA	NA	NA	58	59	f	ml	fp	NaN	l	0	gb	0	0	0	0	0	0	0	0	0	0	0	NaN	NA	NA	NA	0	NA	0	NA	NA	NA	NA	NA	NA	NA	NA	NA	NA	NA	NA	NA	NA	NA	NA	NA	NA
399	DE-0151168	NA	NA	NA	25	25	m	l	f	NaN	r	0	gb	0	0	0	0	0	0	0	0	0	0	0	NaN	NA	NA	NA	0	NA	0	NA	NA	NA	NA	NA	NA	NA	NA	NA	NA	NA	NA	NA	NA	NA	NA	NA	NA
400	DE-0151242	NA	NA	NA	62	62	m	l	p	NaN	l	0	gb	0	0	0	0	0	0	0	0	0	0	0	NaN	NA	NA	NA	0	NA	0	NA	NA	NA	NA	NA	NA	NA	NA	NA	NA	NA	NA	NA	NA	NA	NA	NA	NA
401	DE-0151254	NA	NA	NA	67	67	m	l	f	NaN	r	0	gb	0	0	0	0	0	0	0	0	0	0	0	NaN	NA	NA	NA	0	NA	0	NA	NA	NA	NA	NA	NA	NA	NA	NA	NA	NA	NA	NA	NA	NA	NA	NA	NA
402	DE-0151339	NA	NA	NA	57	57	f	l	t	NaN	r	0	gb	0	0	0	0	0	0	0	0	0	0	0	NaN	NA	NA	NA	0	NA	0	NA	NA	NA	NA	NA	NA	NA	NA	NA	NA	NA	NA	NA	NA	NA	NA	NA	NA
403	DE-0151347	NA	NA	NA	67	68	f	B	B	NaN	NA	0	gb	0	0	0	0	0	0	0	0	0	0	0	NaN	NA	NA	NA	NA	NA	NA	NA	NA	NA	NA	NA	NA	NA	NA	NA	NA	NA	NA	NA	NA	NA	NA	NA	NA
404	DE-0151664	NA	NA	NA	53	53	m	l	t	NaN	r	0	gb	0	0	0	0	0	0	0	0	0	0	0	NaN	NA	NA	NA	0	NA	0	NA	NA	NA	NA	NA	NA	NA	NA	NA	NA	NA	NA	NA	NA	NA	NA	NA	NA
405	DE-0151757	NA	NA	NA	58	58	m	l	f	NaN	l	0	gb	0	0	1	0	0	0	0	0	0	0	0	NaN	NA	NA	NA	0	NA	0	NA	NA	NA	NA	NA	NA	NA	NA	NA	NA	NA	NA	NA	NA	NA	NA	NA	NA
406	DE-0151758	NA	NA	NA	71	71	m	l	t	NaN	l	0	gb	0	0	0	0	0	0	0	0	0	0	0	NaN	NA	NA	NA	0	NA	0	NA	NA	NA	NA	NA	NA	NA	NA	NA	NA	NA	NA	NA	NA	NA	NA	NA	NA
407	DE-0151761	NA	NA	NA	78	78	f	ml	tp	NaN	l	0	gb	0	0	0	0	0	0	0	0	0	0	0	NaN	NA	NA	NA	0	NA	0	NA	NA	NA	NA	NA	NA	NA	NA	NA	NA	NA	NA	NA	NA	NA	NA	NA	NA
408	DE-0151770	NA	NA	NA	67	69	f	l	t	NaN	r	0	gb	0	0	0	0	0	0	0	0	0	0	0	NaN	NA	NA	NA	NA	1	NA	NA	NA	NA	NA	NA	NA	NA	NA	NA	NA	NA	NA	NA	NA	NA	NA	NA	NA
409	DE-0151797	NA	NA	NA	59	59	m	ml	tp	NaN	r	1	lgg	1	0	0	0	0	0	0	0	0	0	0	NaN	NA	NA	NA	0	NA	0	NA	NA	NA	NA	NA	NA	NA	NA	NA	NA	NA	NA	NA	NA	NA	NA	NA	NA
410	DE-0151811	NA	NA	NA	62	62	m	l	p	NaN	l	0	gb	0	0	0	0	0	0	0	0	1	0	0	NaN	NA	NA	NA	NA	NA	NA	NA	NA	NA	NA	NA	NA	NA	NA	NA	NA	NA	NA	NA	NA	NA	NA	NA	NA
411	DE-0151847	NA	NA	NA	53	54	m	ml	po	NaN	r	0	gb	1	0	0	0	0	0	0	0	0	0	0	NaN	NA	NA	NA	0	NA	0	NA	NA	NA	NA	NA	NA	NA	NA	NA	NA	NA	NA	NA	NA	NA	NA	NA	NA
412	DE-0151907	NA	NA	NA	55	56	m	l	p	NaN	r	0	gb	0	0	0	0	0	0	0	0	0	0	0	NaN	NA	NA	NA	NA	NA	NA	NA	NA	NA	NA	NA	NA	NA	NA	NA	NA	NA	NA	NA	NA	NA	NA	NA	NA
413	DE-0152051	NA	NA	NA	75	75	m	l	t	NaN	r	0	gb	0	0	0	0	0	0	0	0	0	0	0	NaN	NA	NA	NA	NA	NA	0	NA	NA	NA	NA	NA	NA	NA	NA	NA	NA	NA	NA	NA	NA	NA	NA	NA	NA
414	DE-0152167	NA	NA	NA	65	65	m	ST	DWM	NaN	NA	0	gb	0	0	0	0	0	0	0	0	0	0	0	NaN	NA	NA	NA	0	NA	0	NA	NA	NA	NA	NA	NA	NA	NA	NA	NA	NA	NA	NA	NA	NA	NA	NA	NA
415	DE-0152169	NA	NA	NA	56	56	m	B	B	NaN	l	0	gb	0	0	0	0	0	0	0	0	0	0	0	NaN	NA	NA	NA	0	NA	0	NA	NA	NA	NA	NA	NA	NA	NA	NA	NA	NA	NA	NA	NA	NA	NA	NA	NA
416	DE-0152416	NA	NA	NA	66	66	m	l	o	NaN	l	0	gb	0	0	0	1	0	0	0	0	0	0	0	NaN	NA	NA	NA	0	NA	0	NA	NA	NA	NA	NA	NA	NA	NA	NA	NA	NA	NA	NA	NA	NA	NA	NA	NA
417	DE-0152495	NA	NA	NA	28	28	f	l	f	NaN	l	0	gb	0	0	0	0	0	0	0	0	0	0	0	NaN	NA	NA	NA	0	NA	0	NA	NA	NA	NA	NA	NA	NA	NA	NA	NA	NA	NA	NA	NA	NA	NA	NA	NA
418	DE-0152496	NA	NA	NA	28	28	m	IT	IT	NaN	NA	0	gb	0	0	0	0	0	0	0	0	0	0	0	NaN	NA	NA	NA	0	NA	0	NA	NA	NA	NA	NA	NA	NA	NA	NA	NA	NA	NA	NA	NA	NA	NA	NA	NA
419	DE-0152498	NA	NA	NA	67	67	m	l	t	NaN	r	0	gb	0	0	0	0	0	0	0	0	0	0	0	cystic	NA	NA	NA	NA	NA	0	NA	NA	NA	NA	NA	NA	NA	NA	NA	NA	NA	NA	NA	NA	NA	NA	NA	NA
420	DE-0152516	NA	NA	NA	41	41	m	B	B	NaN	NA	0	gb	0	0	1	0	0	0	0	0	0	0	0	glomeruloid	NA	NA	NA	NA	NA	NA	NA	NA	NA	NA	NA	NA	NA	NA	NA	NA	NA	NA	NA	NA	NA	NA	NA	NA
421	DE-0152561	NA	NA	NA	75	75	m	l	t	NaN	r	0	gb	0	0	1	0	0	0	0	0	0	0	0	NaN	NA	NA	NA	0	NA	0	NA	NA	NA	NA	NA	NA	NA	NA	NA	NA	NA	NA	NA	NA	NA	NA	NA	NA
422	DE-0152609	NA	NA	NA	51	51	f	ST	CH	NaN	r	0	gb	0	0	0	0	0	0	0	0	0	0	0	NaN	NA	NA	NA	0	NA	0	NA	NA	NA	NA	NA	NA	NA	NA	NA	NA	NA	NA	NA	NA	NA	NA	NA	NA
423	DE-0152670	NA	NA	NA	76	76	f	B	B	NaN	NA	0	gb	0	0	0	0	0	0	0	0	0	0	0	NaN	NA	NA	NA	0	NA	0	NA	NA	NA	NA	NA	NA	NA	NA	NA	NA	NA	NA	NA	NA	NA	NA	NA	NA
424	DE-0152672	NA	NA	NA	55	55	m	l	f	NaN	l	0	gb	1	0	0	0	0	0	0	0	0	0	0	NaN	NA	NA	NA	1	NA	0	NA	NA	NA	NA	NA	NA	NA	NA	NA	NA	NA	NA	NA	NA	NA	NA	NA	NA
425	DE-0153029	NA	NA	NA	69	69	m	ml	tp	NaN	r	0	gb	0	0	0	0	0	0	0	0	0	0	0	NaN	NA	NA	NA	0	NA	0	NA	NA	NA	NA	NA	NA	NA	NA	NA	NA	NA	NA	NA	NA	NA	NA	NA	NA
426	DE-0153393	NA	NA	NA	78	78	f	B	B	NaN	NA	0	gb	0	0	0	0	0	0	0	0	0	0	0	NaN	NA	NA	NA	0	NA	0	NA	NA	NA	NA	NA	NA	NA	NA	NA	NA	NA	NA	NA	NA	NA	NA	NA	NA
427	DE-0153412	NA	NA	NA	61	62	f	l	f	NaN	r	0	gb	0	0	0	0	0	0	0	0	0	0	0	NaN	NA	NA	NA	0	NA	0	NA	NA	NA	NA	NA	NA	NA	NA	NA	NA	NA	NA	NA	NA	NA	NA	NA	NA
428	DE-0153445	NA	NA	NA	43	43	m	l	t	NaN	r	1	gb	1	0	0	0	0	0	0	0	0	0	0	NaN	NA	NA	NA	0	NA	0	NA	NA	NA	NA	NA	NA	NA	NA	NA	NA	NA	NA	NA	NA	NA	NA	NA	NA
429	DE-0153824	NA	NA	NA	44	44	f	ST	TH	NaN	l	0	gb	0	0	1	0	0	0	0	0	0	0	0	NaN	NA	NA	NA	NA	NA	NA	NA	NA	NA	NA	NA	NA	NA	NA	NA	NA	NA	NA	NA	NA	NA	NA	NA	NA
430	DE-0153830	NA	NA	NA	56	56	f	ST	CH	NaN	r	0	gb	0	0	0	0	0	0	0	0	0	0	0	NaN	NA	NA	NA	0	NA	0	NA	NA	NA	NA	NA	NA	NA	NA	NA	NA	NA	NA	NA	NA	NA	NA	NA	NA
431	DE-0153831	NA	NA	NA	76	76	m	l	t	NaN	l	0	gb	0	0	1	0	0	0	0	0	0	0	0	NaN	NA	NA	NA	0	NA	0	NA	NA	NA	NA	NA	NA	NA	NA	NA	NA	NA	NA	NA	NA	NA	NA	NA	NA
432	DE-0153866	NA	NA	NA	44	44	f	ST	CH	NaN	NA	0	gb	0	0	1	0	0	0	0	0	0	0	0	NaN	NA	NA	NA	0	NA	0	NA	NA	NA	NA	NA	NA	NA	NA	NA	NA	NA	NA	NA	NA	NA	NA	NA	NA
433	DE-0154136	NA	NA	NA	43	44	m	l	f	NaN	l	0	gb	0	0	0	0	0	0	0	0	0	0	0	NaN	NA	NA	NA	NA	NA	NA	NA	NA	NA	NA	NA	NA	NA	NA	NA	NA	NA	NA	NA	NA	NA	NA	NA	NA
434	DE-0154204	NA	NA	NA	53	53	f	l	f	NaN	r	0	gb	0	0	0	0	0	0	0	0	0	0	0	NaN	NA	NA	NA	0	NA	0	NA	NA	NA	NA	NA	NA	NA	NA	NA	NA	NA	NA	NA	NA	NA	NA	NA	NA
435	DE-0154332	NA	NA	NA	42	42	m	l	t	NaN	r	0	gb	0	0	0	0	0	0	0	0	0	0	0	NaN	NA	NA	NA	0	NA	0	NA	NA	NA	NA	NA	NA	NA	NA	NA	NA	NA	NA	NA	NA	NA	NA	NA	NA
436	DE-0154345	NA	NA	NA	57	57	f	l	f	NaN	l	0	gb	0	0	0	0	0	0	0	0	0	0	0	NaN	NA	NA	NA	0	NA	0	NA	NA	NA	NA	NA	NA	NA	NA	NA	NA	NA	NA	NA	NA	NA	NA	NA	NA
437	DE-0154369	NA	NA	NA	55	55	m	l	t	NaN	r	0	gb	1	0	0	0	0	0	0	0	0	0	0	NaN	NA	NA	NA	0	NA	0	NA	NA	NA	NA	NA	NA	NA	NA	NA	NA	NA	NA	NA	NA	NA	NA	NA	NA
438	DE-0154375	NA	NA	NA	37	37	m	l	o	NaN	r	0	gb	0	0	0	0	0	0	0	0	0	0	0	NaN	NA	NA	NA	0	NA	0	NA	NA	NA	NA	NA	NA	NA	NA	NA	NA	NA	NA	NA	NA	NA	NA	NA	NA
439	DE-0154525	NA	NA	NA	36	36	m	B	B	NaN	NA	0	gb	1	0	0	0	0	0	0	0	0	0	0	giant cell	NA	NA	NA	0	NA	0	NA	NA	NA	NA	NA	NA	NA	NA	NA	NA	NA	NA	NA	NA	NA	NA	NA	NA
440	DE-0154526	NA	NA	NA	51	51	f	B	B	NaN	NA	0	gb	1	0	0	0	0	0	0	0	0	0	0	NaN	NA	NA	NA	0	NA	0	NA	NA	NA	NA	NA	NA	NA	NA	NA	NA	NA	NA	NA	NA	NA	NA	NA	NA
441	DE-0154613	NA	NA	NA	54	54	f	l	t	NaN	r	0	gb	0	0	0	0	0	0	0	0	0	0	0	NaN	NA	NA	NA	0	NA	0	NA	NA	NA	NA	NA	NA	NA	NA	NA	NA	NA	NA	NA	NA	NA	NA	NA	NA
442	DE-0154711	NA	NA	NA	68	68	m	B	B	NaN	NA	0	gb	0	0	1	0	0	0	0	0	0	0	0	NaN	NA	NA	NA	0	NA	0	NA	NA	NA	NA	NA	NA	NA	NA	NA	NA	NA	NA	NA	NA	NA	NA	NA	NA
443	DE-0154737	NA	NA	NA	58	58	m	l	t	NaN	NA	0	gb	0	0	0	0	0	0	0	0	0	0	0	NaN	NA	NA	NA	0	NA	NA	NA	NA	NA	NA	NA	NA	NA	NA	NA	NA	NA	NA	NA	NA	NA	NA	NA	NA
444	DE-0155036	NA	NA	NA	20	20	m	l	f	NaN	l	0	gb	1	0	0	0	0	0	0	0	0	0	0	NaN	NA	NA	NA	0	NA	0	NA	NA	NA	NA	NA	NA	NA	NA	NA	NA	NA	NA	NA	NA	NA	NA	NA	NA
445	DE-0155041	NA	NA	NA	62	62	m	l	t	NaN	l	0	gb	0	0	0	0	0	0	0	0	0	0	0	NaN	NA	NA	NA	0	NA	0	NA	NA	NA	NA	NA	NA	NA	NA	NA	NA	NA	NA	NA	NA	NA	NA	NA	NA
446	DE-0155084	NA	NA	NA	49	50	m	l	t	NaN	r	0	gb	0	0	0	0	0	0	0	0	0	0	0	NaN	NA	NA	NA	0	NA	0	NA	NA	NA	NA	NA	NA	NA	NA	NA	NA	NA	NA	NA	NA	NA	NA	NA	NA
447	DE-0155100	NA	NA	NA	54	54	m	l	t	NaN	r	0	gb	0	0	0	0	0	0	0	0	0	0	0	NaN	NA	NA	NA	0	NA	0	NA	NA	NA	NA	NA	NA	NA	NA	NA	NA	NA	NA	NA	NA	NA	NA	NA	NA
448	DE-0155107	NA	NA	NA	67	67	f	l	t	NaN	r	0	gb	0	0	0	0	0	0	0	0	0	0	0	NaN	NA	NA	NA	0	NA	0	NA	NA	NA	NA	NA	NA	NA	NA	NA	NA	NA	NA	NA	NA	NA	NA	NA	NA
449	DE-0155210	NA	NA	NA	63	63	m	ml	ft	NaN	r	0	gb	0	0	0	0	0	0	0	0	0	0	0	NaN	NA	NA	NA	0	NA	0	NA	NA	NA	NA	NA	NA	NA	NA	NA	NA	NA	NA	NA	NA	NA	NA	NA	NA
450	DE-0155364	NA	NA	NA	72	72	f	l	f	NaN	r	0	gb	0	0	1	0	0	0	0	0	0	0	0	NaN	5	0	0	NA	NA	NA	NA	NA	NA	NA	NA	NA	NA	NA	NA	NA	NA	NA	NA	NA	NA	NA	NA	NA
451	DE-0155366	NA	NA	NA	58	59	m	l	t	NaN	l	0	gb	0	0	0	0	0	0	0	0	0	0	0	NaN	NA	NA	NA	0	NA	0	NA	NA	NA	NA	NA	NA	NA	NA	NA	NA	NA	NA	NA	NA	NA	NA	NA	NA
452	DE-0155609	NA	NA	NA	75	75	m	l	f	NaN	l	0	gb	0	0	0	0	0	0	0	1	0	0	0	NaN	NA	NA	NA	NA	NA	NA	NA	NA	NA	NA	NA	NA	NA	NA	NA	NA	NA	NA	NA	NA	NA	NA	NA	NA
453	DE-0155618	NA	NA	NA	7	7	m	ST	THMB	NaN	l	0	gb	0	0	1	0	0	0	0	0	1	0	0	neuroepithelial tumor + low-grade astrocytic component	NA	NA	NA	0	NA	0	NA	NA	NA	NA	NA	NA	NA	NA	NA	NA	NA	NA	NA	NA	NA	NA	NA	NA
454	DE-0155644	NA	NA	NA	72	72	f	l	p	NaN	l	0	gb	0	0	0	0	0	0	0	0	0	0	0	NaN	NA	NA	NA	0	NA	0	NA	NA	NA	NA	NA	NA	NA	NA	NA	NA	NA	NA	NA	NA	NA	NA	NA	NA
455	DE-0155743	NA	NA	NA	70	70	f	B	B	NaN	r	0	gb	0	0	0	0	0	0	0	0	0	0	0	NaN	5	0	0	NA	NA	NA	NA	NA	NA	NA	NA	NA	NA	NA	NA	NA	NA	NA	NA	NA	NA	NA	NA	NA
456	DE-0155800	NA	NA	NA	63	63	f	l	o	NaN	r	0	gb	0	0	1	0	0	0	0	0	0	0	0	NaN	NA	NA	NA	0	NA	0	NA	NA	NA	NA	NA	NA	NA	NA	NA	NA	NA	NA	NA	NA	NA	NA	NA	NA
457	DE-0155808	NA	NA	NA	81	81	m	ml	fp	NaN	NA	0	gb	0	0	0	0	0	0	0	0	0	0	0	NaN	NA	NA	NA	0	NA	0	NA	NA	NA	NA	NA	NA	NA	NA	NA	NA	NA	NA	NA	NA	NA	NA	NA	NA
458	DE-0155853	NA	NA	NA	78	81	m	l	o	NaN	l	0	gb	0	0	0	0	0	0	0	0	0	0	0	NaN	NA	NA	NA	0	NA	0	NA	NA	NA	NA	NA	NA	NA	NA	NA	NA	NA	NA	NA	NA	NA	NA	NA	NA
459	DE-0155860	NA	NA	NA	69	70	f	l	f	NaN	r	0	gb	0	0	0	0	0	0	0	0	0	0	0	NaN	NA	NA	NA	0	NA	NA	NA	NA	NA	NA	NA	NA	NA	NA	NA	NA	NA	NA	NA	NA	NA	NA	NA	NA
460	DE-0155883	NA	NA	NA	59	59	m	l	p	NaN	l	0	gb	0	0	0	0	0	0	0	0	0	0	0	NaN	NA	NA	NA	0	NA	0	NA	NA	NA	NA	NA	NA	NA	NA	NA	NA	NA	NA	NA	NA	NA	NA	NA	NA
461	DE-0156051	NA	NA	NA	44	45	m	l	f	NaN	l	0	gb	0	0	1	0	0	0	0	0	0	0	0	NaN	4	0	0	0	NA	0	NA	NA	NA	NA	NA	NA	NA	NA	NA	NA	NA	NA	NA	NA	NA	NA	NA	NA
462	DE-0156081	NA	NA	NA	67	67	f	l	o	NaN	l	0	gb	0	0	1	0	0	0	0	0	0	0	0	NaN	NA	NA	NA	NA	NA	NA	NA	NA	NA	NA	NA	NA	NA	NA	NA	NA	NA	NA	NA	NA	NA	NA	NA	NA
463	DE-0156216	NA	NA	NA	63	64	m	B	B	NaN	NA	0	gb	0	0	1	0	0	0	0	0	0	0	0	NaN	NA	NA	NA	NA	NA	NA	NA	NA	NA	NA	NA	NA	NA	NA	NA	NA	NA	NA	NA	NA	NA	NA	NA	NA
464	DE-0156250	NA	NA	NA	30	30	m	ml	fp	NaN	r	0	gb	0	0	1	0	0	0	0	0	0	0	0	NaN	NA	NA	NA	0	NA	0	NA	NA	NA	NA	NA	NA	NA	NA	NA	NA	NA	NA	NA	NA	NA	NA	NA	NA
465	DE-0156498	NA	NA	NA	61	61	m	l	f	NaN	r	0	gb	0	0	1	0	0	0	0	0	0	0	0	NaN	10	0	0	0	NA	0	NA	NA	NA	NA	NA	NA	NA	NA	NA	NA	NA	NA	NA	NA	NA	NA	NA	NA
466	DE-0156591	NA	NA	NA	56	57	f	l	t	NaN	l	0	gb	0	0	0	0	1	0	0	0	0	0	0	NaN	NA	NA	NA	0	NA	0	NA	NA	NA	NA	NA	NA	NA	NA	NA	NA	NA	NA	NA	NA	NA	NA	NA	NA
467	DE-0156730	NA	NA	NA	55	55	f	l	p	NaN	NA	0	gb	0	0	0	0	0	0	0	0	0	0	0	NaN	NA	NA	NA	0	NA	0	NA	NA	NA	NA	NA	NA	NA	NA	NA	NA	NA	NA	NA	NA	NA	NA	NA	NA
468	DE-0156752	NA	NA	NA	59	59	m	B	B	NaN	NA	0	gb	0	0	1	0	0	0	0	0	0	0	0	NaN	NA	NA	NA	0	NA	0	NA	NA	NA	NA	NA	NA	NA	NA	NA	NA	NA	NA	NA	NA	NA	NA	NA	NA
469	DE-0156762	NA	NA	NA	58	58	f	l	t	NaN	r	0	gb	0	0	0	0	0	0	0	0	0	0	0	NaN	NA	NA	NA	0	NA	0	NA	NA	NA	NA	NA	NA	NA	NA	NA	NA	NA	NA	NA	NA	NA	NA	NA	NA
470	DE-0156838	NA	NA	NA	85	85	m	l	t	NaN	r	0	gb	0	0	0	0	0	0	0	0	0	0	0	NaN	NA	NA	NA	0	NA	0	NA	NA	NA	NA	NA	NA	NA	NA	NA	NA	NA	NA	NA	NA	NA	NA	NA	NA
471	DE-0156922	NA	NA	NA	63	65	f	l	p	NaN	r	0	gb	0	0	0	0	0	0	0	0	0	0	0	NaN	NA	NA	NA	0	NA	0	NA	NA	NA	NA	NA	NA	NA	NA	NA	NA	NA	NA	NA	NA	NA	NA	NA	NA
472	DE-0156999	NA	NA	NA	7	7	m	l	t	NaN	r	0	gb	0	0	0	0	0	0	0	0	0	0	0	NaN	264	1	0	0	NA	NA	NA	NA	NA	NA	NA	NA	NA	NA	NA	NA	NA	NA	NA	NA	NA	NA	NA	NA
473	DE-0157037	NA	NA	NA	46	47	m	B	B	NaN	NA	0	gb	0	0	0	0	0	0	0	0	0	0	0	NaN	NA	NA	NA	NA	NA	NA	NA	NA	NA	NA	NA	NA	NA	NA	NA	NA	NA	NA	NA	NA	NA	NA	NA	NA
474	DE-0157186	NA	NA	NA	53	53	m	l	f	NaN	l	0	gb	0	0	0	0	0	0	0	0	0	0	0	NaN	NA	NA	NA	NA	NA	0	NA	NA	NA	NA	NA	NA	NA	NA	NA	NA	NA	NA	NA	NA	NA	NA	NA	NA
475	DE-0157241	NA	NA	NA	76	76	f	l	f	NaN	r	0	gb	0	0	1	0	0	0	0	0	0	0	0	NaN	9	0	0	0	NA	0	NA	NA	NA	NA	NA	NA	NA	NA	NA	NA	NA	NA	NA	NA	NA	NA	NA	NA
476	DE-0157431	NA	NA	NA	48	48	m	l	f	NaN	NA	0	gb	0	0	0	0	0	0	0	0	0	0	0	NaN	NA	NA	NA	0	NA	0	NA	NA	NA	NA	NA	NA	NA	NA	NA	NA	NA	NA	NA	NA	NA	NA	NA	NA
477	DE-0157443	NA	NA	NA	47	47	m	l	t	NaN	r	1	gb	0	1	0	0	0	0	0	0	0	0	0	NaN	NA	NA	NA	0	NA	0	NA	NA	NA	NA	NA	NA	NA	NA	NA	NA	NA	NA	NA	NA	NA	NA	NA	NA
478	DE-0157530	NA	NA	NA	64	65	m	l	t	NaN	r	0	gb	0	0	0	0	0	0	0	0	0	0	0	NaN	NA	NA	NA	NA	NA	NA	NA	NA	NA	NA	NA	NA	NA	NA	NA	NA	NA	NA	NA	NA	NA	NA	NA	NA
479	DE-0157772	NA	NA	NA	84	84	m	l	t	NaN	r	0	gb	0	0	1	0	0	0	0	0	0	0	0	NaN	NA	NA	NA	NA	NA	NA	NA	NA	NA	NA	NA	NA	NA	NA	NA	NA	NA	NA	NA	NA	NA	NA	NA	NA
480	DE-0157864	NA	NA	NA	43	44	m	B	B	NaN	NA	0	gb	1	0	0	1	0	0	0	0	0	0	0	NaN	72	1	0	0	NA	0	NA	NA	NA	NA	NA	NA	NA	NA	NA	NA	NA	NA	NA	NA	NA	NA	NA	NA
481	DE-0157925	NA	NA	NA	53	58	f	l	o	NaN	l	0	gb	0	0	0	1	0	0	0	0	0	0	0	NaN	NA	NA	NA	0	NA	0	NA	NA	NA	NA	NA	NA	NA	NA	NA	NA	NA	NA	NA	NA	NA	NA	NA	NA
482	DE-0158265	NA	NA	NA	70	70	f	ST	CC	NaN	r	0	gb	0	0	1	0	0	0	0	0	0	0	0	NaN	8	0	0	NA	NA	NA	NA	NA	NA	NA	NA	NA	NA	NA	NA	NA	NA	NA	NA	NA	NA	NA	NA	NA
483	DE-0158292	NA	NA	NA	44	44	f	l	t	NaN	l	0	gb	0	0	0	0	0	0	0	0	0	0	0	NaN	NA	NA	NA	0	NA	0	NA	NA	NA	NA	NA	NA	NA	NA	NA	NA	NA	NA	NA	NA	NA	NA	NA	NA
484	DE-0158300	NA	NA	NA	63	63	m	l	f	NaN	r	0	gb	0	0	0	0	0	0	0	0	0	0	0	NaN	NA	NA	NA	0	NA	0	NA	NA	NA	NA	NA	NA	NA	NA	NA	NA	NA	NA	NA	NA	NA	NA	NA	NA
485	DE-0158304	NA	NA	NA	51	51	f	l	t	NaN	r	1	gb	0	0	0	0	0	0	0	0	0	0	0	NaN	NA	NA	NA	0	NA	0	NA	NA	NA	NA	NA	NA	NA	NA	NA	NA	NA	NA	NA	NA	NA	NA	NA	NA
486	DE-0158318	NA	NA	NA	53	54	f	B	B	NaN	NA	0	gb	1	0	0	0	0	0	0	0	0	0	0	NaN	NA	NA	NA	0	NA	0	NA	NA	NA	NA	NA	NA	NA	NA	NA	NA	NA	NA	NA	NA	NA	NA	NA	NA
487	DE-0158367	NA	NA	NA	72	72	f	l	f	NaN	r	0	gb	1	0	0	0	0	0	0	0	0	0	0	NaN	NA	NA	NA	0	NA	0	NA	NA	NA	NA	NA	NA	NA	NA	NA	NA	NA	NA	NA	NA	NA	NA	NA	NA
488	DE-0158808	NA	NA	NA	43	48	f	ml	tp	NaN	r	0	gb	1	0	1	0	0	0	0	0	0	0	0	NaN	NA	NA	NA	0	NA	0	NA	NA	NA	NA	NA	NA	NA	NA	NA	NA	NA	NA	NA	NA	NA	NA	NA	NA
489	DE-0158818	NA	NA	NA	65	65	m	l	f	NaN	l	0	gb	0	0	0	0	0	0	0	0	0	0	0	NaN	5	0	0	0	NA	0	NA	NA	NA	NA	NA	NA	NA	NA	NA	NA	NA	NA	NA	NA	NA	NA	NA	NA
490	DE-0158910	NA	NA	NA	57	56	m	l	t	NaN	r	0	gb	0	0	0	0	0	0	0	0	0	0	0	NaN	NA	NA	NA	0	NA	0	NA	NA	NA	NA	NA	NA	NA	NA	NA	NA	NA	NA	NA	NA	NA	NA	NA	NA
491	DE-0159390	NA	NA	NA	75	76	f	l	f	NaN	l	0	gb	0	0	1	0	0	0	0	0	0	0	0	NaN	NA	NA	NA	NA	NA	NA	NA	NA	NA	NA	NA	NA	NA	NA	NA	NA	NA	NA	NA	NA	NA	NA	NA	NA
492	DE-0159402	NA	NA	NA	58	58	m	ml	po	NaN	NA	0	gb	0	0	0	1	0	0	0	0	0	0	0	NaN	NA	NA	NA	0	NA	0	NA	NA	NA	NA	NA	NA	NA	NA	NA	NA	NA	NA	NA	NA	NA	NA	NA	NA
493	DE-0159413	NA	NA	NA	26	26	m	ST	CH	NaN	NA	0	gb	1	0	0	0	0	0	0	0	0	0	0	NaN	NA	NA	NA	NA	NA	0	NA	NA	NA	NA	NA	NA	NA	NA	NA	NA	NA	NA	NA	NA	NA	NA	NA	NA
494	DE-0159452	NA	NA	NA	60	60	m	B	B	NaN	r	0	gb	0	0	1	0	0	0	0	0	0	0	0	NaN	4	0	0	0	NA	0	NA	NA	NA	NA	NA	NA	NA	NA	NA	NA	NA	NA	NA	NA	NA	NA	NA	NA
495	DE-0159489	NA	NA	NA	55	57	m	l	t	NaN	l	1	gb	0	0	0	0	0	0	0	0	0	0	0	NaN	NA	NA	NA	0	NA	0	NA	NA	NA	NA	NA	NA	NA	NA	NA	NA	NA	NA	NA	NA	NA	NA	NA	NA
496	DE-0159499	NA	NA	NA	63	63	m	ST	CH	NaN	NA	0	gb	0	0	0	0	0	0	0	0	0	0	0	NaN	2	0	0	0	1	0	NA	NA	NA	NA	NA	NA	NA	NA	NA	NA	NA	NA	NA	NA	NA	NA	NA	NA
497	DE-0159565	NA	NA	NA	53	55	m	ST	CH	NaN	l	0	gb	0	0	0	0	0	0	0	0	0	0	0	NaN	NA	NA	NA	0	NA	0	NA	NA	NA	NA	NA	NA	NA	NA	NA	NA	NA	NA	NA	NA	NA	NA	NA	NA
498	DE-0159647	NA	NA	NA	67	67	f	B	B	NaN	NA	0	gb	1	0	0	0	0	0	0	0	0	0	0	NaN	8	0	0	0	NA	0	NA	NA	NA	NA	NA	NA	NA	NA	NA	NA	NA	NA	NA	NA	NA	NA	NA	NA
499	DE-0159721	NA	NA	NA	80	80	m	l	t	NaN	l	0	gb	0	0	0	0	0	0	0	0	0	0	0	NaN	NA	NA	NA	NA	NA	NA	NA	NA	NA	NA	NA	NA	NA	NA	NA	NA	NA	NA	NA	NA	NA	NA	NA	NA
500	DE-0159756	NA	NA	NA	55	55	m	l	f	NaN	r	0	gb	0	0	0	0	0	0	0	0	0	0	0	NaN	NA	NA	NA	0	NA	0	NA	NA	NA	NA	NA	NA	NA	NA	NA	NA	NA	NA	NA	NA	NA	NA	NA	NA
501	DE-0159793	NA	NA	NA	51	51	f	ST	CH	NaN	r	0	gb	0	0	0	0	1	0	0	0	0	0	0	cystic	NA	NA	NA	0	NA	0	NA	NA	NA	NA	NA	NA	NA	NA	NA	NA	NA	NA	NA	NA	NA	NA	NA	NA
502	DE-0159794	NA	NA	NA	37	37	m	ml	ftp	NaN	l	0	gb	0	0	0	0	0	0	0	0	0	0	0	NaN	NA	NA	NA	0	NA	0	NA	NA	NA	NA	NA	NA	NA	NA	NA	NA	NA	NA	NA	NA	NA	NA	NA	NA
503	DE-0159803	NA	NA	NA	72	73	m	l	t	NaN	l	0	gb	1	0	0	0	0	0	0	0	0	0	0	NaN	NA	NA	NA	0	NA	0	NA	NA	NA	NA	NA	NA	NA	NA	NA	NA	NA	NA	NA	NA	NA	NA	NA	NA
504	DE-0159983	NA	NA	NA	52	52	m	l	t	NaN	r	0	gb	0	0	0	0	0	0	0	0	0	0	0	NaN	4	0	0	NA	NA	NA	NA	NA	NA	NA	NA	NA	NA	NA	NA	NA	NA	NA	NA	NA	NA	NA	NA	NA
505	DE-0160012	NA	NA	NA	72	73	m	l	f	NaN	r	0	gb	0	0	1	0	0	0	0	0	0	0	0	NaN	NA	NA	NA	0	NA	0	NA	NA	NA	NA	NA	NA	NA	NA	NA	NA	NA	NA	NA	NA	NA	NA	NA	NA
506	DE-0160221	NA	NA	NA	76	76	f	l	p	NaN	l	0	gb	0	0	0	0	0	0	0	0	0	0	0	NaN	NA	NA	NA	0	NA	0	NA	NA	NA	NA	NA	NA	NA	NA	NA	NA	NA	NA	NA	NA	NA	NA	NA	NA
507	DE-0160281	NA	NA	NA	41	41	m	l	t	NaN	r	0	gb	0	0	0	0	0	0	0	0	0	0	0	NaN	NA	NA	NA	NA	NA	NA	NA	NA	NA	NA	NA	NA	NA	NA	NA	NA	NA	NA	NA	NA	NA	NA	NA	NA
508	DE-0160739	NA	NA	NA	62	62	m	l	f	NaN	l	0	gb	0	0	0	0	0	0	0	0	0	0	0	NaN	NA	NA	NA	NA	NA	NA	NA	NA	NA	NA	NA	NA	NA	NA	NA	NA	NA	NA	NA	NA	NA	NA	NA	NA
509	DE-0160763	NA	NA	NA	46	47	m	B	B	NaN	NA	0	gb	0	0	0	0	0	0	0	0	0	0	0	NaN	NA	NA	NA	NA	NA	NA	NA	NA	NA	NA	NA	NA	NA	NA	NA	NA	NA	NA	NA	NA	NA	NA	NA	NA
510	DE-0160885	NA	NA	NA	55	56	f	l	p	NaN	l	1	gb	0	0	0	0	0	0	0	0	0	0	0	osteoid and chondroid differentiation	9	0	0	0	NA	0	NA	NA	NA	NA	NA	NA	NA	NA	NA	NA	NA	NA	0	NA	NA	0	NA	NA
511	DE-0160909	NA	NA	NA	48	48	f	ml	fp	NaN	l	0	gb	1	0	0	0	0	0	0	0	0	0	0	NaN	NA	NA	NA	0	NA	0	NA	NA	NA	NA	NA	NA	NA	NA	NA	NA	NA	NA	NA	NA	NA	NA	NA	NA
512	DE-0161112	NA	NA	NA	50	51	m	B	B	NaN	r	0	gb	0	0	1	0	0	0	0	0	0	0	0	NaN	NA	NA	NA	0	NA	0	NA	NA	NA	NA	NA	NA	NA	NA	NA	NA	NA	NA	NA	NA	NA	NA	NA	NA
513	DE-0161119	NA	NA	NA	53	53	f	l	t	NaN	l	0	gb	1	0	1	0	0	0	0	0	0	0	0	NaN	2	0	0	0	NA	0	NA	NA	NA	NA	NA	NA	NA	NA	NA	NA	NA	NA	0	NA	NA	0	NA	NA
514	DE-0161287	NA	NA	NA	49	50	m	l	t	NaN	r	0	gb	0	0	0	0	0	1	0	0	0	0	0	NaN	NA	NA	NA	0	NA	0	NA	NA	NA	NA	NA	NA	NA	NA	NA	NA	NA	NA	NA	NA	NA	NA	NA	NA
515	DE-0161288	NA	NA	NA	70	71	m	l	f	NaN	l	0	gb	0	0	0	0	0	0	0	0	0	0	0	NaN	NA	NA	NA	0	NA	0	NA	NA	NA	NA	NA	NA	NA	NA	NA	NA	NA	NA	NA	NA	NA	NA	NA	NA
516	DE-0161400	NA	NA	NA	68	68	f	ml	po	NaN	r	0	gb	0	0	0	0	0	0	0	0	0	0	0	NaN	NA	NA	NA	0	NA	0	NA	NA	NA	NA	NA	NA	NA	NA	NA	NA	NA	NA	NA	NA	NA	NA	NA	NA
517	DE-0161406	NA	NA	NA	75	75	m	l	o	NaN	r	0	gb	0	0	0	0	0	0	0	0	0	0	0	NaN	NA	NA	NA	1	NA	0	NA	NA	NA	NA	NA	NA	NA	NA	NA	NA	NA	NA	NA	NA	NA	NA	NA	NA
518	DE-0161426	NA	NA	NA	30	31	m	l	f	NaN	l	0	gb	0	0	0	0	0	0	0	0	0	0	0	NaN	NA	NA	NA	0	NA	0	NA	NA	NA	NA	NA	NA	NA	NA	NA	NA	NA	NA	NA	NA	NA	NA	NA	NA
519	DE-0161451	NA	NA	NA	46	46	m	l	f	NaN	l	0	gb	1	0	0	0	0	0	0	0	0	0	0	NaN	NA	NA	NA	0	NA	0	NA	NA	NA	NA	NA	NA	NA	NA	NA	NA	NA	NA	NA	NA	NA	NA	NA	NA
520	DE-0161497	NA	NA	NA	53	53	m	l	p	NaN	r	0	gb	0	0	1	0	0	0	0	0	0	0	0	NaN	NA	NA	NA	0	NA	0	NA	NA	NA	NA	NA	NA	NA	NA	NA	NA	NA	NA	NA	NA	NA	NA	NA	NA
521	DE-0161508	NA	NA	NA	23	25	m	B	B	NaN	l	0	gb	0	0	0	0	0	0	0	0	0	0	0	NaN	NA	NA	NA	0	NA	0	NA	NA	NA	NA	NA	NA	NA	NA	NA	NA	NA	NA	NA	NA	NA	NA	NA	NA
522	DE-0161589	NA	NA	NA	49	49	f	B	B	NaN	NA	0	gb	0	0	1	0	0	0	0	0	0	0	0	NaN	NA	NA	NA	NA	NA	NA	NA	NA	NA	NA	NA	NA	NA	NA	NA	NA	NA	NA	NA	NA	NA	NA	NA	NA
523	DE-0161775	NA	NA	NA	64	64	f	l	p	NaN	l	0	gb	0	0	1	0	0	0	0	0	0	0	0	NaN	NA	NA	NA	0	NA	0	NA	NA	NA	NA	NA	NA	NA	NA	NA	NA	NA	NA	NA	NA	NA	NA	NA	NA
524	DE-0161798	NA	NA	NA	48	48	m	l	t	NaN	r	0	gb	0	0	0	0	0	0	0	0	0	0	0	NaN	NA	NA	NA	0	NA	0	NA	NA	NA	NA	NA	NA	NA	NA	NA	NA	NA	NA	NA	NA	NA	NA	NA	NA
525	DE-0162066	NA	NA	NA	68	68	m	l	f	NaN	r	0	gb	0	0	0	0	0	0	0	0	0	0	0	NaN	NA	NA	NA	0	NA	0	NA	NA	NA	NA	NA	NA	NA	NA	NA	NA	NA	NA	NA	NA	NA	NA	NA	NA
526	DE-0162242	NA	NA	NA	52	52	m	l	t	NaN	r	0	gb	0	0	0	0	0	0	0	0	0	0	0	NaN	NA	NA	NA	NA	NA	NA	NA	NA	NA	NA	NA	NA	NA	NA	NA	NA	NA	NA	NA	NA	NA	NA	NA	NA
527	DE-0162260	NA	NA	NA	46	46	f	ST	TH	NaN	r	0	gb	0	0	0	0	0	0	0	0	0	0	0	NaN	NA	NA	NA	0	NA	0	NA	NA	NA	NA	NA	NA	NA	NA	NA	NA	NA	NA	NA	NA	NA	NA	NA	NA
528	DE-0162261	NA	NA	NA	36	36	f	l	f	NaN	r	0	gb	0	0	0	0	0	1	0	0	0	0	0	NaN	5	0	0	0	NA	0	NA	NA	NA	NA	NA	NA	NA	NA	NA	NA	NA	NA	0	NA	NA	0	NA	NA
529	DE-0162289	NA	NA	NA	50	50	m	B	B	NaN	NA	0	gb	0	0	0	0	0	0	0	0	0	0	0	NaN	NA	NA	NA	0	NA	0	NA	NA	NA	NA	NA	NA	NA	NA	NA	NA	NA	NA	NA	NA	NA	NA	NA	NA
530	DE-0162366	NA	NA	NA	25	35	m	l	f	NaN	r	0	gb	0	0	0	1	0	0	0	0	0	0	0	NaN	NA	NA	NA	0	NA	0	NA	NA	NA	NA	NA	NA	NA	NA	NA	NA	NA	NA	NA	NA	NA	NA	NA	NA
531	DE-0162480	NA	NA	NA	40	43	f	B	B	NaN	NA	0	gb	0	0	1	0	0	0	0	0	0	0	0	NaN	NA	NA	NA	0	NA	0	NA	NA	NA	NA	NA	NA	NA	NA	NA	NA	NA	NA	NA	NA	NA	NA	NA	NA
532	DE-0162519	NA	NA	NA	41	41	m	B	B	NaN	NA	0	gb	0	0	0	0	0	0	0	0	0	0	0	NaN	3	0	0	0	NA	0	NA	NA	NA	NA	NA	NA	NA	NA	NA	NA	NA	NA	0	NA	NA	0	NA	NA
533	DE-0162954	NA	NA	NA	48	48	f	ml	fp	NaN	l	0	gb	1	0	0	0	0	0	0	0	0	0	0	NaN	8	0	0	NA	NA	NA	NA	NA	NA	NA	NA	NA	NA	NA	NA	NA	NA	NA	0	NA	NA	0	NA	NA
534	DE-0163093	NA	NA	NA	57	60	f	l	p	NaN	r	0	gb	0	0	0	1	0	0	0	0	0	0	0	NaN	4	0	0	NA	NA	NA	NA	NA	NA	NA	NA	NA	NA	NA	NA	NA	NA	NA	1	NA	NA	0	NA	NA
535	DE-0163125	NA	NA	NA	43	43	m	B	B	NaN	NA	0	gb	0	0	1	0	0	0	0	0	0	0	0	NaN	NA	NA	NA	0	NA	0	NA	NA	NA	NA	NA	NA	NA	NA	NA	NA	NA	NA	NA	NA	NA	NA	NA	NA
536	DE-0163358	NA	NA	NA	18	18	m	IT	CB	NaN	NA	0	gb	0	0	1	0	0	0	0	0	0	0	0	NaN	NA	NA	NA	0	NA	0	NA	NA	NA	NA	NA	NA	NA	NA	NA	NA	NA	NA	NA	NA	NA	NA	NA	NA
537	DE-0163600	NA	NA	NA	62	62	m	B	B	NaN	NA	0	gb	0	0	0	0	0	0	0	0	0	0	0	NaN	NA	NA	NA	0	NA	0	NA	NA	NA	NA	NA	NA	NA	NA	NA	NA	NA	NA	NA	NA	NA	NA	NA	NA
538	DE-0163769	NA	NA	NA	59	60	m	l	f	NaN	r	0	gb	0	0	0	0	0	0	0	0	0	0	0	NaN	2	0	0	0	NA	0	NA	NA	NA	NA	NA	NA	NA	NA	NA	NA	NA	NA	0	NA	NA	0	NA	NA
539	DE-0163848	NA	NA	NA	69	69	m	l	t	NaN	l	0	gb	0	0	0	0	0	0	0	0	0	0	0	NaN	NA	NA	NA	0	NA	0	NA	NA	NA	NA	NA	NA	NA	NA	NA	NA	NA	NA	NA	NA	NA	NA	NA	NA
540	DE-0163879	NA	NA	NA	59	62	m	l	t	NaN	r	0	gb	0	0	0	0	0	0	0	0	0	0	0	NaN	NA	NA	NA	0	NA	0	NA	NA	NA	NA	NA	NA	NA	NA	NA	NA	NA	NA	NA	NA	NA	NA	NA	NA
541	DE-0163891	NA	NA	NA	54	57	m	l	t	NaN	l	0	gb	0	0	1	0	0	0	0	0	0	0	0	NaN	NA	NA	NA	0	NA	0	NA	NA	NA	NA	NA	NA	NA	NA	NA	NA	NA	NA	NA	NA	NA	NA	NA	NA
542	DE-0164125	NA	NA	NA	51	51	f	B	B	NaN	r	1	gb	0	0	0	0	0	0	0	0	0	0	0	NaN	4	0	0	0	NA	0	NA	NA	NA	NA	NA	NA	NA	NA	NA	NA	NA	NA	0	NA	NA	0	NA	NA
543	DE-0164163	NA	NA	NA	51	51	f	l	f	NaN	l	0	gb	0	0	0	0	0	0	0	0	0	0	0	heterogeneous patterns	15	0	1	0	NA	0	NA	NA	NA	NA	NA	NA	NA	NA	NA	NA	NA	NA	1	NA	NA	0	NA	NA
544	DE-0164213	NA	NA	NA	64	64	m	B	B	NaN	NA	0	gb	0	0	0	0	0	0	0	0	0	0	0	NaN	NA	NA	NA	NA	NA	NA	NA	NA	NA	NA	NA	NA	NA	NA	NA	NA	NA	NA	NA	NA	NA	NA	NA	NA
545	DE-0164248	NA	NA	NA	54	58	f	l	f	NaN	l	0	gb	0	0	0	0	0	0	0	0	0	0	0	NaN	4	0	0	0	NA	0	NA	NA	NA	NA	NA	NA	NA	NA	NA	NA	NA	NA	0	NA	NA	0	NA	NA
546	DE-0164261	NA	NA	NA	49	51	m	l	p	NaN	l	0	gb	0	0	0	0	0	0	0	0	0	0	0	NaN	4	0	0	0	NA	0	NA	NA	NA	NA	NA	NA	NA	NA	NA	NA	NA	NA	0	NA	NA	0	NA	NA
547	DE-0164442	NA	NA	NA	47	47	m	l	p	NaN	l	0	gb	0	0	0	0	0	0	0	0	0	0	0	NaN	NA	NA	NA	NA	NA	0	NA	NA	NA	NA	NA	NA	NA	NA	NA	NA	NA	NA	NA	NA	NA	NA	NA	NA
548	DE-0164467	NA	NA	NA	77	77	m	l	t	NaN	r	0	gb	0	0	1	0	0	0	0	0	0	0	0	NaN	NA	NA	NA	0	NA	0	NA	NA	NA	NA	NA	NA	NA	NA	NA	NA	NA	NA	NA	NA	NA	NA	NA	NA
549	DE-0164482	NA	NA	NA	67	67	m	l	p	NaN	l	0	gb	0	0	1	0	0	0	0	0	0	0	0	NaN	NA	NA	NA	0	NA	0	NA	NA	NA	NA	NA	NA	NA	NA	NA	NA	NA	NA	NA	NA	NA	NA	NA	NA
550	DE-0164489	NA	NA	NA	75	75	m	l	t	NaN	r	0	gb	1	0	1	0	0	0	0	0	0	0	0	NaN	NA	NA	NA	0	NA	0	NA	NA	NA	NA	NA	NA	NA	NA	NA	NA	NA	NA	NA	NA	NA	NA	NA	NA
551	DE-0164501	NA	NA	NA	73	74	f	l	f	NaN	r	0	gb	0	0	1	0	0	0	0	0	0	0	0	NaN	NA	NA	NA	0	NA	0	NA	NA	NA	NA	NA	NA	NA	NA	NA	NA	NA	NA	NA	NA	NA	NA	NA	NA
552	DE-0164583	NA	NA	NA	55	55	f	l	t	NaN	r	0	gb	0	0	0	0	0	0	0	0	0	0	0	NaN	6	0	0	0	NA	0	NA	NA	NA	NA	NA	NA	NA	NA	NA	NA	NA	NA	0	NA	NA	0	NA	NA
553	DE-0164791	NA	NA	NA	39	39	m	l	f	NaN	r	0	gb	0	0	0	0	0	0	0	0	0	0	0	NaN	NA	NA	NA	0	NA	0	NA	NA	NA	NA	NA	NA	NA	NA	NA	NA	NA	NA	NA	NA	NA	NA	NA	NA
554	DE-0164894	NA	NA	NA	50	50	m	B	B	NaN	NA	0	gb	0	0	1	0	0	0	0	0	0	0	0	NaN	NA	NA	NA	0	NA	0	NA	NA	NA	NA	NA	NA	NA	NA	NA	NA	NA	NA	NA	NA	NA	NA	NA	NA
555	DE-0165012	NA	NA	NA	61	62	m	l	t	NaN	r	0	gb	0	0	0	0	0	0	0	0	0	0	0	NaN	NA	NA	NA	0	NA	0	NA	NA	NA	NA	NA	NA	NA	NA	NA	NA	NA	NA	NA	NA	NA	NA	NA	NA
556	DE-0165405	NA	NA	NA	64	65	m	l	f	NaN	l	0	gb	0	0	0	0	0	0	0	0	0	0	0	NaN	NA	NA	NA	0	NA	0	NA	NA	NA	NA	NA	NA	NA	NA	NA	NA	NA	NA	NA	NA	NA	NA	NA	NA
557	DE-0165644	NA	NA	NA	66	66	f	l	t	NaN	NA	0	gb	1	0	0	0	0	0	0	0	0	0	0	NaN	5	0	0	0	NA	0	NA	NA	NA	NA	NA	NA	NA	NA	NA	NA	NA	NA	0	NA	NA	0	NA	NA
558	DE-0165667	NA	NA	NA	47	47	f	l	p	NaN	NA	0	gb	0	0	1	1	0	0	0	0	0	0	0	NaN	NA	NA	NA	0	NA	NA	NA	NA	NA	NA	NA	NA	NA	NA	NA	NA	NA	NA	NA	NA	NA	NA	NA	NA
559	DE-0165781	NA	NA	NA	66	66	f	l	o	NaN	r	0	gb	0	0	0	0	0	0	0	0	0	0	0	NaN	NA	NA	NA	0	NA	0	NA	NA	NA	NA	NA	NA	NA	NA	NA	NA	NA	NA	NA	NA	NA	NA	NA	NA
560	DE-0165831	NA	NA	NA	56	56	m	l	f	NaN	r	0	gb	0	0	0	0	0	0	0	0	0	0	0	NaN	4	0	0	0	NA	0	NA	NA	NA	NA	NA	NA	NA	NA	NA	NA	NA	NA	0	NA	NA	0	NA	NA
561	DE-0166060	NA	NA	NA	52	51	m	l	f	NaN	b	0	gb	0	0	1	0	0	0	0	0	0	0	0	NaN	NA	NA	NA	NA	NA	NA	NA	NA	NA	NA	NA	NA	NA	NA	NA	NA	NA	NA	NA	NA	NA	NA	NA	NA
562	DE-0166332	NA	NA	NA	61	61	f	l	o	NaN	r	0	gb	0	0	0	0	0	0	0	0	0	0	0	NaN	NA	NA	NA	NA	NA	NA	NA	NA	NA	NA	NA	NA	NA	NA	NA	NA	NA	NA	NA	NA	NA	NA	NA	NA
563	DE-0166346	NA	NA	NA	78	78	m	l	p	NaN	r	0	gb	0	0	0	0	0	0	0	0	0	0	0	NaN	3	0	0	0	NA	0	NA	NA	NA	NA	NA	NA	NA	NA	NA	NA	NA	NA	0	NA	NA	0	NA	NA
564	DE-0166418	NA	NA	NA	58	59	f	l	o	NaN	l	0	gb	0	0	0	0	0	0	0	0	0	0	0	NaN	NA	NA	NA	0	NA	0	NA	NA	NA	NA	NA	NA	NA	NA	NA	NA	NA	NA	NA	NA	NA	NA	NA	NA
565	DE-0166468	NA	NA	NA	60	60	m	l	t	NaN	l	0	gb	0	0	0	0	0	0	0	0	0	0	0	NaN	5	0	0	0	NA	0	NA	NA	NA	NA	NA	NA	NA	NA	NA	NA	NA	NA	0	NA	NA	0	NA	NA
566	DE-0166530	NA	NA	NA	60	60	m	B	B	NaN	NA	0	gb	0	0	1	0	0	0	0	0	0	0	0	NaN	NA	NA	NA	0	NA	0	NA	NA	NA	NA	NA	NA	NA	NA	NA	NA	NA	NA	NA	NA	NA	NA	NA	NA
567	DE-0166531	NA	NA	NA	64	64	m	B	B	NaN	NA	0	gb	0	0	1	0	0	1	0	0	0	0	0	NaN	NA	NA	NA	0	NA	0	NA	NA	NA	NA	NA	NA	NA	NA	NA	NA	NA	NA	NA	NA	NA	NA	NA	NA
568	DE-0166722	NA	NA	NA	49	49	m	l	t	NaN	r	0	gb	0	0	0	0	0	0	0	0	0	0	0	NaN	5	0	0	0	NA	0	NA	NA	NA	NA	NA	NA	NA	NA	NA	NA	NA	NA	0	NA	NA	0	NA	NA
569	DE-0166923	NA	NA	NA	56	56	m	l	t	NaN	r	0	gb	0	0	0	0	0	0	0	0	0	0	0	NaN	NA	NA	NA	NA	NA	NA	NA	NA	NA	NA	NA	NA	NA	NA	NA	NA	NA	NA	NA	NA	NA	NA	NA	NA
570	DE-0167083	NA	NA	NA	60	63	m	l	t	NaN	l	0	gb	0	0	0	0	0	0	0	0	0	0	0	NaN	8	0	0	0	NA	0	NA	NA	NA	NA	NA	NA	NA	NA	NA	NA	NA	NA	0	NA	NA	0	NA	NA
571	DE-0167092	NA	NA	NA	7	7	f	IT	IT	NaN	NA	0	gb	0	0	1	0	0	0	0	0	0	0	0	NaN	1	0	0	0	NA	0	NA	NA	NA	NA	NA	NA	NA	NA	NA	NA	NA	NA	0	NA	NA	0	NA	NA
572	DE-0167107	NA	NA	NA	74	74	m	l	t	NaN	NA	0	gb	0	0	0	0	0	0	0	0	0	0	0	NaN	4	0	0	0	NA	0	NA	NA	NA	NA	NA	NA	NA	NA	NA	NA	NA	NA	0	NA	NA	0	NA	NA
573	DE-0167581	NA	NA	NA	50	50	m	B	B	NaN	NA	0	gb	0	0	1	0	0	0	0	0	0	0	0	NaN	NA	NA	NA	NA	NA	NA	NA	NA	NA	NA	NA	NA	NA	NA	NA	NA	NA	NA	NA	NA	NA	NA	NA	NA
574	DE-0167583	NA	NA	NA	67	67	m	l	t	NaN	l	0	gb	0	0	0	0	0	0	0	0	0	0	0	NaN	NA	NA	NA	NA	NA	NA	NA	NA	NA	NA	NA	NA	NA	NA	NA	NA	NA	NA	NA	NA	NA	NA	NA	NA
575	DE-0168567	NA	NA	NA	46	46	m	ml	fp	NaN	l	0	gb	0	0	1	0	0	0	0	0	0	0	0	NaN	NA	NA	NA	NA	NA	NA	NA	NA	NA	NA	NA	NA	NA	NA	NA	NA	NA	NA	NA	NA	NA	NA	NA	NA
576	DE-0168930	NA	NA	NA	53	53	m	l	f	NaN	r	0	gb	0	0	1	0	0	0	0	0	0	0	0	NaN	4	0	0	NA	NA	NA	NA	NA	NA	NA	NA	NA	NA	NA	NA	NA	NA	NA	0	NA	NA	0	NA	NA
577	DE-0168949	NA	NA	NA	64	64	f	l	t	NaN	r	0	gb	0	0	1	0	0	0	0	0	0	0	0	NaN	NA	NA	NA	NA	NA	NA	NA	NA	NA	NA	NA	NA	NA	NA	NA	NA	NA	NA	NA	NA	NA	NA	NA	NA
578	DE-0169045	NA	NA	NA	35	35	m	l	t	NaN	l	0	gb	0	0	0	0	0	0	0	0	0	0	0	NaN	1	0	0	NA	NA	NA	NA	NA	NA	NA	NA	NA	NA	NA	NA	NA	NA	NA	0	NA	NA	0	NA	NA
579	DE-0169050	NA	NA	NA	35	35	m	l	t	NaN	l	1	gb	0	0	0	0	0	0	0	0	0	0	0	NaN	1	0	0	NA	NA	NA	NA	NA	NA	NA	NA	NA	NA	NA	NA	NA	NA	NA	0	NA	NA	0	NA	NA
580	DE-0169154	NA	NA	NA	59	59	m	l	t	NaN	r	0	gb	0	0	0	0	0	0	0	0	0	0	0	NaN	NA	NA	NA	NA	NA	NA	NA	NA	NA	NA	NA	NA	NA	NA	NA	NA	NA	NA	NA	NA	NA	NA	NA	NA
581	DE-0169191	NA	NA	NA	47	47	m	l	p	NaN	r	0	gb	1	0	0	0	0	0	0	0	0	0	0	NaN	6	0	0	NA	NA	NA	NA	NA	NA	NA	NA	NA	NA	NA	NA	NA	NA	NA	0	NA	NA	0	NA	NA
582	DE-0169254	NA	NA	NA	53	53	f	l	p	NaN	l	0	gb	0	0	0	0	0	0	0	0	0	0	0	NaN	6	0	0	NA	NA	NA	NA	NA	NA	NA	NA	NA	NA	NA	NA	NA	NA	NA	0	NA	NA	0	NA	NA
583	DE-0169422	NA	NA	NA	49	51	m	B	B	NaN	NA	0	gb	0	0	1	0	0	0	0	0	0	0	0	NaN	1	0	0	NA	NA	NA	NA	NA	0	0	0	0	0	0	0	0	0	0	0	0	0	0	0	0
584	DE-0169531	NA	NA	NA	66	68	f	l	t	NaN	r	0	gb	1	0	0	0	0	0	0	0	0	0	0	NaN	NA	NA	NA	NA	NA	NA	NA	NA	NA	NA	NA	NA	NA	NA	NA	NA	NA	NA	NA	NA	NA	NA	NA	NA
585	DE-0169554	NA	NA	NA	56	56	f	l	o	NaN	NA	0	gb	0	0	0	0	0	0	0	0	0	0	0	NaN	6	0	0	NA	NA	NA	NA	NA	NA	NA	NA	NA	NA	NA	NA	NA	NA	NA	0	NA	NA	0	NA	NA
586	DE-0170059	NA	NA	NA	61	61	m	ml	po	NaN	r	0	gb	0	0	0	0	0	0	0	0	0	0	0	NaN	NA	NA	NA	NA	NA	NA	NA	NA	NA	NA	NA	NA	NA	NA	NA	NA	NA	NA	NA	NA	NA	NA	NA	NA
587	DE-0170338	NA	NA	NA	59	59	m	B	B	NaN	NA	0	gb	0	0	1	0	0	0	0	0	0	0	0	NaN	NA	NA	NA	NA	NA	0	NA	NA	NA	NA	NA	NA	NA	NA	NA	NA	NA	NA	NA	NA	NA	NA	NA	NA
588	DE-0170400	NA	NA	NA	54	54	m	l	p	NaN	l	0	gb	0	1	0	0	0	0	0	0	0	0	0	NaN	6	0	0	NA	NA	0	NA	NA	0	0	0	0	0	0	0	0	0	0	0	0	0	0	0	0
589	DE-0170416	NA	NA	NA	45	46	f	l	t	NaN	r	0	gb	0	0	0	0	0	0	0	0	0	0	0	NaN	NA	NA	NA	NA	NA	NA	NA	NA	NA	NA	NA	NA	NA	NA	NA	NA	NA	NA	NA	NA	NA	NA	NA	NA
590	DE-0170462	NA	NA	NA	62	62	m	ST	CH	NaN	l	0	gb	0	0	0	0	0	0	0	0	0	0	0	NaN	NA	NA	NA	NA	NA	NA	NA	NA	NA	NA	NA	NA	NA	NA	NA	NA	NA	NA	NA	NA	NA	NA	NA	NA
591	DE-0170694	NA	NA	NA	63	63	m	l	t	NaN	l	0	gb	0	0	0	0	0	0	0	0	0	0	0	NaN	7	0	0	NA	NA	0	NA	NA	0	0	0	0	0	0	0	0	0	0	0	0	0	0	0	0
592	DE-0170710	NA	NA	NA	54	54	m	B	B	NaN	NA	1	gb	0	0	1	0	0	0	0	0	0	0	0	NaN	91	1	1	NA	NA	0	NA	NA	0	0	0	0	0	0	0	0	0	0	0	0	0	0	0	0
593	DE-0170712	NA	NA	NA	72	72	f	l	t	NaN	r	0	gb	1	0	0	0	0	0	0	0	0	0	0	NaN	NA	NA	NA	NA	NA	0	NA	NA	NA	NA	NA	NA	NA	NA	NA	NA	NA	NA	NA	NA	NA	NA	NA	NA
594	DE-0170760	NA	NA	NA	44	44	m	l	f	NaN	NA	0	gb	0	0	1	0	0	0	0	0	0	0	0	NaN	5	0	0	NA	NA	0	NA	NA	0	0	0	0	0	0	0	0	0	0	0	0	0	0	0	0
595	DE-0170853	NA	NA	NA	56	57	m	l	f	NaN	l	0	gb	0	0	1	0	0	0	0	0	0	0	0	NaN	NA	NA	NA	NA	NA	0	NA	NA	NA	NA	NA	NA	NA	NA	NA	NA	NA	NA	NA	NA	NA	NA	NA	NA
596	DE-0170856	NA	NA	NA	63	64	f	l	p	NaN	l	0	gb	0	0	0	0	0	0	0	0	0	0	0	NaN	NA	NA	NA	NA	NA	0	NA	NA	NA	NA	NA	NA	NA	NA	NA	NA	NA	NA	NA	NA	NA	NA	NA	NA
597	DE-0170883	NA	NA	NA	59	59	m	l	p	NaN	r	0	gb	0	0	0	0	0	0	0	0	0	0	0	NaN	NA	NA	NA	NA	NA	0	NA	NA	NA	NA	NA	NA	NA	NA	NA	NA	NA	NA	NA	NA	NA	NA	NA	NA
598	DE-0170973	NA	NA	NA	63	63	m	l	p	NaN	l	0	gb	0	0	0	0	0	0	0	0	0	0	0	NaN	4	0	0	NA	NA	0	NA	NA	0	0	0	0	0	0	0	0	0	0	0	0	0	0	0	0
599	DE-0171004	NA	NA	NA	65	65	m	l	f	NaN	l	0	gb	0	0	0	0	0	0	0	0	0	0	0	NaN	2	0	0	NA	NA	0	NA	NA	0	0	0	0	0	0	0	0	0	0	0	0	0	0	0	0
600	DE-0171102	NA	NA	NA	66	66	m	l	f	NaN	NA	0	gb	0	0	1	0	0	0	0	0	0	0	0	NaN	6	0	0	NA	NA	NA	NA	NA	0	0	0	0	0	0	0	0	0	0	0	0	0	0	0	0
601	DE-0171122	NA	NA	NA	47	47	m	B	B	NaN	NA	0	gb	0	0	1	0	0	0	0	0	0	0	0	NaN	7	0	0	NA	NA	0	NA	NA	0	0	0	0	0	0	0	0	0	0	0	0	0	0	0	0
602	DE-0171261	NA	NA	NA	29	29	f	NNS	subCut	NaN	NA	0	gb	0	0	0	0	0	0	1	0	0	0	0	NaN	NA	NA	NA	NA	NA	0	NA	NA	NA	NA	NA	NA	NA	NA	NA	NA	NA	NA	NA	NA	NA	NA	NA	NA
603	DE-0171293	NA	NA	NA	39	39	m	l	f	NaN	r	0	gb	0	0	0	0	0	0	0	0	0	0	0	NaN	NA	NA	NA	NA	NA	NA	NA	NA	NA	NA	NA	NA	NA	NA	NA	NA	NA	NA	NA	NA	NA	NA	NA	NA
604	DE-0171380	NA	NA	NA	67	69	f	l	t	NaN	l	0	gb	0	0	0	0	0	0	0	0	0	0	0	NaN	4	0	0	NA	NA	0	NA	NA	0	0	0	0	0	0	0	0	0	0	0	0	0	0	0	0
605	DE-0171467	NA	NA	NA	64	64	f	l	f	NaN	l	0	gb	0	0	1	0	0	0	0	0	0	0	0	NaN	NA	NA	NA	NA	NA	NA	NA	NA	NA	NA	NA	NA	NA	NA	NA	NA	NA	NA	NA	NA	NA	NA	NA	NA
606	DE-0171479	NA	NA	NA	60	61	f	ml	fp	NaN	r	0	gb	0	0	0	0	0	0	0	0	0	0	0	NaN	3	0	0	NA	NA	NA	NA	NA	0	0	0	0	0	0	0	0	0	0	0	0	0	0	0	0
607	DE-0171524	NA	NA	NA	58	58	f	l	t	NaN	l	0	gb	0	0	0	0	0	0	0	0	0	0	0	NaN	NA	NA	NA	NA	NA	NA	NA	NA	NA	NA	NA	NA	NA	NA	NA	NA	NA	NA	NA	NA	NA	NA	NA	NA
608	DE-0171578	NA	NA	NA	63	63	m	l	f	NaN	l	0	gb	0	0	0	0	0	0	0	0	0	0	0	NaN	4	0	0	NA	NA	0	NA	NA	0	0	0	0	0	0	0	0	0	0	0	0	0	0	0	0
609	DE-0171630	NA	NA	NA	68	68	f	B	B	NaN	l	0	gb	0	0	0	0	0	0	0	0	0	0	0	NaN	4	0	0	NA	NA	0	NA	NA	0	0	0	0	0	0	0	0	0	0	0	0	0	0	0	0
610	DE-0171641	NA	NA	NA	68	68	m	l	f	NaN	l	0	gb	0	0	0	0	0	0	0	0	0	0	0	NaN	70	1	0	NA	NA	0	NA	NA	0	0	0	0	0	0	0	0	0	0	0	0	0	0	0	0
611	DE-0171779	NA	NA	NA	57	57	m	l	f	NaN	r	0	gb	0	0	1	0	0	0	0	0	0	0	0	NaN	6	0	0	NA	NA	0	NA	NA	0	0	0	0	0	0	0	0	0	0	0	0	0	0	0	0
612	DE-0172204	NA	NA	NA	57	57	f	l	t	NaN	l	0	gb	0	0	1	0	0	0	0	0	0	0	0	NaN	5	0	0	NA	NA	0	NA	NA	0	0	0	0	0	0	0	0	0	0	0	0	1	0	0	0
613	DE-0172299	NA	NA	NA	34	34	m	l	t	NaN	r	0	gb	0	0	0	0	0	0	0	0	0	0	0	NaN	4	0	0	NA	NA	0	NA	NA	0	0	0	0	0	0	0	0	0	0	0	0	0	0	0	0
614	DE-0172322	NA	NA	NA	63	63	f	l	f	NaN	r	0	gb	0	0	1	0	0	0	0	0	0	0	0	NaN	4	0	0	NA	NA	0	NA	NA	0	0	0	0	0	0	0	0	0	0	0	0	0	0	0	0
615	DE-0172327	NA	NA	NA	60	60	m	l	f	NaN	l	0	gb	0	0	0	0	0	0	0	0	0	0	0	NaN	4	0	0	NA	NA	NA	NA	NA	0	0	0	0	0	0	0	0	0	0	0	0	0	0	0	0
616	DE-0172329	NA	NA	NA	52	52	f	l	p	NaN	l	0	gb	1	0	0	0	0	0	0	0	0	0	0	NaN	6	0	0	NA	NA	NA	NA	NA	0	0	0	0	0	0	0	0	0	0	0	0	0	0	0	0
617	DE-0172485	NA	NA	NA	56	56	f	l	o	NaN	r	0	gb	0	0	0	0	0	0	0	0	0	0	0	NaN	NA	NA	NA	NA	NA	0	NA	NA	NA	NA	NA	NA	NA	NA	NA	NA	NA	NA	NA	NA	NA	NA	NA	NA
618	DE-0172499	NA	NA	NA	29	32	f	l	f	NaN	r	0	gb	0	0	0	0	0	0	0	0	0	0	0	NaN	4	0	0	NA	NA	0	NA	NA	0	0	0	0	0	0	0	0	0	0	0	0	0	0	0	0
619	DE-0172626	NA	NA	NA	64	64	m	l	f	NaN	r	0	gb	1	1	0	0	0	0	0	0	0	0	0	NaN	NA	NA	NA	NA	NA	0	NA	NA	NA	NA	NA	NA	NA	NA	NA	NA	NA	NA	NA	NA	NA	NA	NA	NA
620	DE-0173027	NA	NA	NA	48	48	m	l	f	NaN	r	0	gb	1	0	0	0	0	0	0	0	0	0	0	NaN	NA	NA	NA	NA	NA	NA	NA	NA	NA	NA	NA	NA	NA	NA	NA	NA	NA	NA	NA	NA	NA	NA	NA	NA
621	DE-0173082	NA	NA	NA	89	89	m	l	t	NaN	r	0	gb	0	0	1	0	0	0	0	0	0	0	0	NaN	NA	NA	NA	NA	NA	NA	NA	NA	NA	NA	NA	NA	NA	NA	NA	NA	NA	NA	NA	NA	NA	NA	NA	NA
622	DE-0173085	NA	NA	NA	50	50	m	l	f	NaN	r	0	gb	0	0	0	0	0	0	0	0	0	0	0	NaN	NA	NA	NA	NA	NA	0	NA	NA	NA	NA	NA	NA	NA	NA	NA	NA	NA	NA	NA	NA	NA	NA	NA	NA
623	DE-0173139	NA	NA	NA	50	50	m	B	B	NaN	r	0	gb	1	1	0	0	0	0	0	0	0	0	0	NaN	NA	NA	NA	NA	NA	0	NA	NA	NA	NA	NA	NA	NA	NA	NA	NA	NA	NA	NA	NA	NA	NA	NA	NA
624	DE-0173258	NA	NA	NA	56	57	f	l	t	NaN	r	0	gb	0	0	0	0	0	0	0	0	0	0	0	NaN	NA	NA	NA	NA	NA	0	NA	NA	NA	NA	NA	NA	NA	NA	NA	NA	NA	NA	NA	NA	NA	NA	NA	NA
625	DE-0173387	NA	NA	NA	57	57	m	l	t	NaN	l	0	gb	0	0	0	0	0	0	0	0	0	0	0	NaN	3	0	0	NA	NA	0	NA	NA	0	0	0	0	0	0	0	0	0	0	0	0	0	0	0	0
626	DE-0173446	NA	NA	NA	71	71	m	B	B	NaN	NA	0	gb	0	0	0	0	0	0	0	0	0	0	0	NaN	NA	NA	NA	NA	NA	NA	NA	NA	NA	NA	NA	NA	NA	NA	NA	NA	NA	NA	NA	NA	NA	NA	NA	NA
627	DE-0173552	NA	NA	NA	46	46	m	ml	fp	NaN	r	0	gb	0	0	0	0	0	0	0	0	0	0	0	NaN	10	0	0	NA	NA	0	NA	NA	0	0	0	0	0	0	0	0	0	0	0	0	0	0	0	0
628	DE-0173555	NA	NA	NA	59	59	m	l	f	NaN	r	0	gb	0	0	0	0	0	0	0	0	0	0	0	NaN	NA	NA	NA	NA	NA	0	NA	NA	NA	NA	NA	NA	NA	NA	NA	NA	NA	NA	NA	NA	NA	NA	NA	NA
629	DE-0173596	NA	NA	NA	76	76	m	B	B	NaN	NA	0	gb	0	0	0	0	0	0	0	0	0	0	0	NaN	6	0	0	NA	NA	0	NA	NA	0	0	0	0	0	0	0	0	0	0	0	0	0	0	0	0
630	DE-0173604	NA	NA	NA	59	59	f	l	p	NaN	r	1	gb	0	0	0	0	0	0	0	0	0	0	0	NaN	6	0	0	NA	NA	0	NA	NA	0	0	0	0	0	0	0	0	0	0	0	0	0	0	0	0
631	DE-0173629	NA	NA	NA	58	58	m	l	f	NaN	l	0	gb	0	0	0	0	0	0	0	0	0	0	0	NaN	6	0	0	NA	NA	0	NA	NA	0	0	0	0	0	0	0	0	0	0	0	0	0	0	0	0
632	DE-0173859	NA	NA	NA	74	74	f	B	B	NaN	NA	0	gb	0	0	0	0	0	0	0	0	0	0	0	NaN	8	0	0	NA	NA	0	NA	NA	0	0	0	0	0	0	0	0	0	0	0	0	0	0	0	0
633	DE-0173942	NA	NA	NA	59	59	m	B	B	NaN	NA	1	gb	0	0	1	0	0	0	0	0	0	0	0	NaN	7	0	0	NA	NA	NA	NA	NA	0	0	0	0	0	0	0	0	0	0	0	0	0	0	0	0
634	DE-0174049	NA	NA	NA	63	63	m	l	t	NaN	l	0	gb	0	0	0	0	0	0	0	0	0	0	0	NaN	2	0	0	NA	NA	NA	NA	NA	0	0	0	0	0	0	0	0	0	0	0	0	0	0	0	0
635	DE-0174065	NA	NA	NA	60	60	m	l	t	NaN	r	0	gb	0	0	0	0	0	0	0	0	0	0	0	NaN	6	0	0	NA	NA	0	NA	NA	0	0	0	0	0	0	0	0	0	0	0	0	0	0	0	0
636	DE-0174081	NA	NA	NA	40	40	m	l	f	NaN	l	0	gb	0	0	0	0	0	0	0	0	0	0	0	NaN	NA	NA	NA	NA	NA	0	NA	NA	NA	NA	NA	NA	NA	NA	NA	NA	NA	NA	NA	NA	NA	NA	NA	NA
637	DE-0174082	NA	NA	NA	33	33	m	B	B	NaN	NA	0	gb	0	0	0	0	0	0	0	0	0	0	0	NaN	NA	NA	NA	NA	NA	0	NA	NA	NA	NA	NA	NA	NA	NA	NA	NA	NA	NA	NA	NA	NA	NA	NA	NA
638	DE-0174179	NA	NA	NA	53	53	m	l	t	NaN	r	0	gb	0	0	0	0	0	0	0	0	0	0	0	NaN	6	0	0	NA	NA	0	NA	NA	0	0	0	0	0	0	0	0	0	0	0	0	0	0	0	0
639	DE-0174207	NA	NA	NA	40	40	f	l	p	NaN	r	0	gb	0	0	0	0	0	0	0	0	0	0	0	NaN	4	0	0	NA	NA	0	NA	NA	0	0	0	0	0	0	0	0	0	0	0	0	0	0	0	0
640	DE-0174226	NA	NA	NA	67	67	m	ml	fp	NaN	r	0	gb	0	0	1	0	0	0	0	0	0	0	0	NaN	7	0	0	NA	NA	0	NA	NA	0	0	0	0	0	0	0	0	0	0	0	0	0	0	0	0
641	DE-0174252	NA	NA	NA	47	47	m	l	p	NaN	l	0	gb	0	0	0	0	0	0	0	0	0	0	0	NaN	NA	NA	NA	NA	NA	0	NA	NA	NA	NA	NA	NA	NA	NA	NA	NA	NA	NA	NA	NA	NA	NA	NA	NA
642	DE-0174259	NA	NA	NA	44	44	m	B	B	NaN	NA	0	gb	0	0	0	0	0	0	0	0	0	0	0	NaN	4	0	0	NA	NA	0	NA	NA	0	0	0	0	0	0	0	0	0	0	0	0	0	0	0	0
643	DE-0174268	NA	NA	NA	55	55	m	l	p	NaN	r	0	gb	1	0	0	0	0	0	0	0	0	0	0	NaN	NA	NA	NA	NA	NA	NA	NA	NA	NA	NA	NA	NA	NA	NA	NA	NA	NA	NA	NA	NA	NA	NA	NA	NA
644	DE-0174285	NA	NA	NA	74	74	m	l	t	NaN	NA	0	gb	0	0	0	0	0	0	0	0	0	0	0	NaN	NA	NA	NA	NA	NA	0	NA	NA	NA	NA	NA	NA	NA	NA	NA	NA	NA	NA	NA	NA	NA	NA	NA	NA
645	DE-0174486	NA	NA	NA	67	67	m	B	B	NaN	NA	0	gb	0	0	1	0	0	0	0	0	0	0	0	NaN	1	0	0	NA	NA	0	NA	NA	0	0	0	0	0	0	0	0	0	0	0	0	0	0	0	0
646	DE-0174528	NA	NA	NA	67	67	f	ST	CH	NaN	NA	0	gb	0	0	0	0	0	0	0	0	0	0	0	NaN	6	0	0	NA	NA	0	NA	NA	0	0	0	0	0	0	0	0	0	0	0	0	0	0	0	0
647	DE-0174690	NA	NA	NA	32	32	f	l	p	NaN	r	0	gb	1	0	0	0	0	0	0	0	0	0	0	NaN	4	0	NA	NA	NA	NA	NA	NA	0	0	0	0	0	0	0	0	0	0	0	0	0	0	0	0
648	DE-0174711	NA	NA	NA	29	29	f	l	t	NaN	r	0	gb	0	0	0	0	0	0	0	0	0	0	0	NaN	NA	NA	NA	NA	NA	0	NA	NA	NA	NA	NA	NA	NA	NA	NA	NA	NA	NA	NA	NA	NA	NA	NA	NA
649	DE-0174718	NA	NA	NA	66	66	m	B	B	NaN	NA	0	gb	1	0	1	0	0	0	0	0	0	1	0	NaN	1	0	0	NA	NA	0	NA	NA	0	0	0	0	0	0	0	0	0	0	0	0	0	0	0	0
650	DE-0175215	NA	NA	NA	58	58	m	l	t	NaN	r	0	gb	0	0	0	0	0	0	0	0	0	0	0	NaN	7	0	0	NA	NA	NA	NA	NA	0	0	0	0	0	0	0	0	0	0	0	0	0	0	0	0
651	DE-0175235	NA	NA	NA	4	5	m	l	p	NaN	l	0	gb	1	0	0	0	0	0	0	0	0	0	0	NaN	9	0	0	NA	NA	0	NA	NA	0	0	0	0	0	0	0	0	0	0	0	0	0	0	0	0
652	DE-0175498	NA	NA	NA	30	31	f	NNS	N	LN	r	0	gb	0	0	0	0	0	0	0	0	0	0	0	NaN	NA	NA	NA	NA	NA	0	NA	NA	NA	NA	NA	NA	NA	NA	NA	NA	NA	NA	NA	NA	NA	NA	NA	NA
653	DE-0175535	NA	NA	NA	14	14	m	l	t	NaN	NA	0	gb	1	0	0	0	0	0	0	0	0	0	0	NaN	NA	NA	NA	NA	NA	0	NA	NA	NA	NA	NA	NA	NA	NA	NA	NA	NA	NA	NA	NA	NA	NA	NA	NA
654	DE-0175604	NA	NA	NA	79	79	m	l	t	NaN	l	0	gb	0	0	0	0	0	0	0	0	0	0	0	NaN	1	0	0	NA	NA	0	NA	NA	0	0	0	0	0	0	0	0	0	0	0	0	0	0	0	0
655	DE-0175613	NA	NA	NA	68	68	m	ST	TH	NaN	r	0	gb	0	0	1	0	0	0	0	0	0	0	0	NaN	2	0	0	NA	NA	NA	NA	NA	0	0	0	0	0	0	0	0	0	0	0	0	0	0	0	0
656	DE-0176008	NA	NA	NA	64	64	f	l	f	NaN	l	1	gb	1	1	0	0	0	0	0	0	0	0	0	NaN	NA	NA	NA	NA	NA	NA	NA	NA	NA	NA	NA	NA	NA	NA	NA	NA	NA	NA	NA	NA	NA	NA	NA	NA
657	DE-0176022	NA	NA	NA	69	69	m	l	f	NaN	r	0	gb	0	0	1	0	0	0	0	0	0	0	0	NaN	3	0	0	NA	NA	0	NA	NA	0	0	0	0	0	0	0	0	0	1	0	0	0	0	0	0
658	DE-0176140	NA	NA	NA	59	59	f	l	p	NaN	r	0	gb	0	0	1	0	0	0	0	0	0	0	0	NaN	4	0	0	NA	NA	0	NA	NA	0	0	0	0	0	0	0	0	0	0	0	0	0	0	0	0
659	DE-0176174	NA	NA	NA	59	59	f	l	p	NaN	l	0	gb	0	0	0	0	0	0	0	0	0	0	0	NaN	5	0	0	NA	NA	0	NA	NA	0	0	0	0	0	0	0	0	0	0	0	0	0	0	0	0
660	DE-0176182	NA	NA	NA	65	65	m	l	f	NaN	l	0	gb	0	1	0	0	0	0	0	0	0	0	0	NaN	4	0	0	NA	NA	NA	NA	NA	0	0	0	0	0	0	0	0	0	0	0	0	0	0	0	0
661	DE-0176348	NA	NA	NA	81	81	f	B	B	NaN	NA	0	gb	0	0	1	0	0	0	0	0	0	0	0	NaN	6	0	0	NA	NA	0	NA	NA	0	0	0	0	0	0	0	0	0	0	0	0	0	0	0	0
662	DE-0176497	NA	NA	NA	56	56	m	l	f	NaN	l	0	gb	0	0	0	0	0	0	0	0	0	0	0	NaN	4	0	0	NA	NA	0	NA	NA	0	0	0	0	0	0	0	0	0	0	0	0	0	0	0	0
663	DE-0176542	NA	NA	NA	58	58	f	ml	tp	NaN	l	0	gb	0	0	0	0	0	0	0	0	0	0	0	NaN	6	0	0	NA	NA	0	NA	NA	0	0	0	0	0	0	0	0	0	0	0	0	0	0	0	0
664	DE-0176634	NA	NA	NA	51	51	f	B	B	NaN	NA	0	gb	1	0	0	0	0	0	0	0	0	0	0	NaN	1	0	0	NA	NA	NA	NA	NA	0	0	0	0	0	0	0	0	0	0	0	0	0	0	0	0
665	DE-0176687	NA	NA	NA	66	66	m	l	f	NaN	l	0	gb	0	0	0	0	0	0	0	0	0	0	0	NaN	3	0	0	NA	NA	0	NA	NA	0	0	0	0	0	0	0	0	0	0	0	0	0	0	0	0
666	DE-0176699	NA	NA	NA	64	64	m	l	f	NaN	r	0	gb	0	0	0	0	0	0	0	0	0	0	0	NaN	8	0	0	NA	NA	0	NA	NA	0	0	0	0	0	0	0	0	0	0	0	0	0	0	0	0
667	DE-0176831	NA	NA	NA	66	68	f	l	t	NaN	l	1	gb	0	0	0	0	0	0	0	0	0	0	0	NaN	8	0	0	NA	NA	NA	NA	NA	0	0	0	0	0	0	0	0	0	0	0	0	0	0	0	0
668	DE-0176842	NA	NA	NA	79	79	m	l	f	NaN	r	0	gb	0	0	1	0	0	0	0	0	0	0	0	NaN	NA	NA	NA	NA	NA	0	NA	NA	NA	NA	NA	NA	NA	NA	NA	NA	NA	NA	NA	NA	NA	NA	NA	NA
669	DE-0176864	NA	NA	NA	52	52	m	l	o	NaN	l	0	gb	0	0	0	0	0	0	0	0	0	0	0	NaN	6	0	0	NA	NA	0	NA	NA	0	0	0	0	0	0	0	0	0	0	0	0	0	0	0	0
670	DE-0176884	NA	NA	NA	71	72	f	l	f	NaN	r	0	gb	0	0	0	0	0	0	0	0	0	0	0	NaN	NA	NA	NA	NA	NA	NA	NA	NA	NA	NA	NA	NA	NA	NA	NA	NA	NA	NA	NA	NA	NA	NA	NA	NA
671	DE-0176915	NA	NA	NA	63	63	m	l	f	NaN	r	0	gb	0	0	0	1	0	0	0	0	0	0	0	NaN	NA	NA	NA	NA	NA	NA	NA	NA	NA	NA	NA	NA	NA	NA	NA	NA	NA	NA	NA	NA	NA	NA	NA	NA
672	DE-0176920	NA	NA	NA	26	26	m	IT	CB	NaN	r	0	gb	0	0	0	0	0	0	0	0	0	0	0	NaN	7	0	0	NA	NA	NA	NA	NA	0	0	0	0	0	0	0	0	0	0	0	0	0	0	0	0
673	DE-0177808	NA	NA	NA	67	67	m	l	f	NaN	r	0	gb	0	0	0	0	0	0	0	0	0	0	0	NaN	5	0	0	NA	NA	0	NA	NA	0	0	0	0	0	0	0	0	0	0	0	0	0	0	0	0
674	DE-0177811	NA	NA	NA	69	69	m	l	f	NaN	r	0	gb	0	0	1	0	0	0	0	0	0	0	0	NaN	4	0	0	NA	NA	NA	NA	NA	0	0	0	0	0	0	0	0	0	0	0	0	0	0	0	0
675	DE-0177906	NA	NA	NA	68	68	m	l	f	NaN	r	0	gb	0	0	0	0	0	0	0	0	0	0	0	NaN	1	0	0	NA	NA	0	NA	NA	0	0	0	0	0	0	0	0	0	0	0	0	0	0	0	0
676	DE-0178072	NA	NA	NA	64	64	m	l	p	NaN	r	0	gb	0	0	0	0	0	0	0	0	0	0	0	NaN	6	0	0	NA	NA	0	NA	NA	0	0	0	0	0	0	0	0	0	0	0	0	0	0	0	0
677	DE-0178093	NA	NA	NA	67	67	f	l	f	NaN	r	0	gb	0	0	0	0	0	0	0	0	0	0	0	NaN	6	0	0	NA	NA	NA	NA	NA	0	0	0	0	0	0	0	0	0	0	0	1	0	0	0	0
678	DE-0178389	NA	NA	NA	61	62	m	l	t	NaN	NA	0	gb	1	0	0	0	0	0	0	0	0	1	0	NaN	5	0	0	NA	NA	0	NA	NA	0	0	0	0	0	0	0	0	0	0	0	0	0	0	0	0
679	DE-0178423	NA	NA	NA	65	65	f	B	B	NaN	NA	0	gb	0	0	0	0	0	0	0	0	0	0	0	NaN	8	0	0	NA	NA	NA	NA	NA	0	0	0	0	0	0	0	0	0	0	0	0	0	0	0	0
680	DE-0178538	NA	NA	NA	70	73	f	l	o	NaN	r	0	gb	0	0	0	0	0	0	0	0	0	0	0	NaN	NA	NA	NA	NA	NA	NA	NA	NA	NA	NA	NA	NA	NA	NA	NA	NA	NA	NA	NA	NA	NA	NA	NA	NA
681	DE-0178556	NA	NA	NA	47	47	m	l	p	NaN	l	0	gb	0	0	0	0	0	0	0	0	0	0	0	NaN	4	0	0	NA	NA	NA	NA	NA	0	0	0	0	0	0	0	0	0	0	0	0	0	0	0	0
682	DE-0178623	NA	NA	NA	76	76	f	l	t	NaN	r	0	gb	0	0	0	0	0	0	0	0	0	0	0	NaN	4	0	0	NA	NA	0	NA	NA	0	0	0	0	0	0	0	0	0	0	0	0	0	0	0	0
683	DE-0178670	NA	NA	NA	36	36	m	l	f	NaN	l	0	gb	1	0	0	0	0	0	0	0	0	0	0	NaN	6	0	0	NA	NA	0	NA	NA	0	0	0	0	0	0	0	0	0	0	0	0	0	0	0	0
684	DE-0178671	NA	NA	NA	59	59	m	l	t	NaN	NA	1	gb	1	0	0	0	0	0	0	0	0	0	0	NaN	6	0	0	NA	NA	0	NA	NA	0	0	0	0	0	0	0	0	0	0	0	0	0	0	0	0
685	DE-0178767	NA	NA	NA	63	64	m	l	t	NaN	r	0	gb	0	0	0	0	0	0	0	0	0	0	0	NaN	5	0	0	NA	NA	NA	NA	NA	0	0	0	0	0	0	0	0	0	0	0	0	0	0	0	0
686	DE-0178938	NA	NA	NA	28	29	m	B	B	NaN	NA	0	gb	0	0	0	0	0	0	0	0	0	0	0	NaN	1	0	0	NA	NA	0	NA	NA	0	0	0	0	0	0	0	0	0	0	0	0	0	0	0	0
687	DE-0179011	NA	NA	NA	69	69	m	ml	tp	NaN	r	0	gb	0	0	0	0	0	0	0	0	0	0	0	NaN	NA	NA	NA	NA	NA	NA	NA	NA	NA	NA	NA	NA	NA	NA	NA	NA	NA	NA	NA	NA	NA	NA	NA	NA
688	DE-0179085	NA	NA	NA	46	46	f	l	t	NaN	l	0	gb	0	0	0	0	0	0	0	0	0	0	0	NaN	3	0	0	NA	NA	NA	NA	NA	0	0	0	0	0	0	0	0	0	0	0	0	0	0	0	0
689	DE-0179269	NA	NA	NA	58	58	f	l	t	NaN	r	0	gb	0	0	0	0	0	0	0	0	0	0	0	NaN	4	0	0	NA	NA	NA	NA	NA	0	0	0	0	0	0	0	0	0	0	0	0	0	0	0	0
690	DE-0179298	NA	NA	NA	62	63	m	ST	CH	NaN	l	0	gb	0	0	0	0	0	0	0	0	0	0	0	NaN	NA	NA	NA	NA	NA	NA	NA	NA	NA	NA	NA	NA	NA	NA	NA	NA	NA	NA	NA	NA	NA	NA	NA	NA
691	DE-0179317	NA	NA	NA	63	64	m	l	f	NaN	NA	0	gb	0	0	0	0	0	0	0	0	0	0	0	NaN	NA	NA	NA	NA	NA	0	NA	NA	NA	NA	NA	NA	NA	NA	NA	NA	NA	NA	NA	NA	NA	NA	NA	NA
692	DE-0179329	NA	NA	NA	69	69	m	B	B	NaN	r	0	gb	0	0	1	0	0	0	0	0	0	0	0	NaN	5	0	0	NA	NA	0	NA	NA	0	0	0	0	0	0	0	0	0	0	0	0	0	0	0	0
693	DE-0179435	NA	NA	NA	57	57	m	l	p	NaN	l	0	gb	0	1	0	0	0	0	0	0	0	0	0	NaN	6	0	0	NA	NA	0	NA	NA	0	0	0	0	0	0	0	0	0	0	0	0	0	0	0	0
694	DE-0179471	NA	NA	NA	68	68	m	l	f	NaN	r	0	gb	0	0	0	0	0	0	0	0	0	0	0	NaN	6	0	0	NA	NA	0	NA	NA	0	0	0	0	0	0	0	0	0	0	0	0	0	0	0	0
695	DE-0179479	NA	NA	NA	59	59	m	l	t	NaN	l	0	gb	0	0	0	0	0	0	0	0	0	0	0	NaN	4	0	0	NA	NA	0	NA	NA	0	0	0	0	0	0	0	0	0	0	0	0	0	0	0	0
696	DE-0179793	NA	NA	NA	64	65	f	B	B	NaN	NA	0	gb	0	0	1	0	0	0	0	0	0	0	0	NaN	3	0	0	NA	NA	0	NA	NA	0	0	0	0	0	0	0	0	0	0	0	0	0	0	0	0
697	DE-0180085	NA	NA	NA	73	73	m	l	o	NaN	l	0	gb	0	0	1	0	0	0	0	0	0	0	0	NaN	NA	NA	NA	NA	NA	NA	NA	NA	NA	NA	NA	NA	NA	NA	NA	NA	NA	NA	NA	NA	NA	NA	NA	NA
698	DE-0180114	NA	NA	NA	62	63	m	B	B	NaN	NA	0	gb	0	0	0	0	0	0	0	0	0	0	0	NaN	4	0	0	NA	NA	0	NA	NA	0	0	0	0	0	0	0	0	0	0	0	0	0	0	0	0
699	DE-0180132	NA	NA	NA	35	35	f	B	B	NaN	NA	0	gb	1	0	0	0	0	0	0	0	0	0	0	NaN	18	1	0	NA	NA	0	NA	NA	0	0	0	0	0	0	0	0	0	0	0	0	0	0	0	0
700	DE-0180208	NA	NA	NA	17	17	f	ST	TH	NaN	l	0	gb	0	0	1	0	0	0	0	0	0	0	0	NaN	NA	NA	NA	NA	NA	NA	NA	NA	NA	NA	NA	NA	NA	NA	NA	NA	NA	NA	NA	NA	NA	NA	NA	NA
701	DE-0180224	NA	NA	NA	70	70	f	l	t	NaN	NA	1	gb	0	0	0	0	0	0	0	0	0	0	0	NaN	9	0	0	NA	NA	0	NA	NA	0	0	0	0	0	0	0	0	0	0	0	0	0	0	0	0
702	DE-0180362	NA	NA	NA	46	47	m	l	f	NaN	r	0	gb	0	0	0	0	0	0	0	0	0	0	0	NaN	2	0	0	NA	NA	0	NA	NA	0	0	0	0	0	0	0	0	0	0	0	0	0	0	0	0
703	DE-0180465	NA	NA	NA	46	53	f	ml	to	NaN	r	0	gb	0	0	0	1	0	0	0	0	0	0	0	NaN	6	0	0	NA	NA	0	NA	NA	0	0	0	0	0	0	0	0	0	0	0	0	0	0	0	0
704	DE-0180573	NA	NA	NA	61	61	m	l	t	NaN	r	0	gb	1	0	0	0	0	0	0	0	0	0	0	NaN	NA	NA	NA	NA	NA	0	NA	NA	NA	NA	NA	NA	NA	NA	NA	NA	NA	NA	NA	NA	NA	NA	NA	NA
705	DE-0180619	NA	NA	NA	14	14	f	IT	IT	NaN	NA	0	gb	0	0	0	0	0	0	0	0	0	0	0	NaN	4	0	0	NA	NA	0	NA	NA	0	0	0	0	0	0	0	0	0	0	0	0	0	0	0	0
706	DE-0180715	NA	NA	NA	31	35	f	l	f	NaN	r	0	gb	0	0	1	0	0	0	0	0	0	0	0	NaN	NA	NA	NA	NA	NA	NA	NA	NA	NA	NA	NA	NA	NA	NA	NA	NA	NA	NA	NA	NA	NA	NA	NA	NA
707	DE-0180734	NA	NA	NA	73	73	m	B	B	NaN	NA	0	gb	0	0	0	0	0	0	0	0	0	0	0	NaN	4	0	0	NA	NA	0	NA	NA	0	0	0	0	0	0	0	0	0	0	0	0	0	0	0	0
708	DE-0180744	NA	NA	NA	56	56	f	l	f	NaN	r	0	gb	0	0	0	0	0	0	0	0	0	0	0	NaN	6	0	0	NA	NA	0	NA	NA	0	0	0	0	0	0	0	0	0	0	0	0	0	0	0	0
709	DE-0181068	NA	NA	NA	41	41	f	ST	TH	NaN	NA	0	gb	1	0	0	0	0	0	0	0	0	0	0	NaN	NA	NA	NA	NA	NA	0	NA	NA	NA	NA	NA	NA	NA	NA	NA	NA	NA	NA	NA	NA	NA	NA	NA	NA
710	DE-0181074	NA	NA	NA	41	42	m	l	f	NaN	l	1	gb	0	0	0	0	0	0	0	0	0	0	0	NaN	NA	NA	NA	NA	NA	0	NA	NA	NA	NA	NA	NA	NA	NA	NA	NA	NA	NA	NA	NA	NA	NA	NA	NA
711	DE-0181105	NA	NA	NA	65	66	f	l	t	NaN	r	0	gb	0	0	0	0	0	0	0	0	0	0	0	NaN	2	0	0	NA	NA	0	NA	NA	0	0	0	0	0	0	0	0	0	0	0	0	0	0	0	0
712	DE-0181123	NA	NA	NA	56	56	f	l	p	NaN	r	0	gb	0	0	0	0	0	0	0	0	0	0	0	NaN	7	0	0	NA	NA	0	NA	NA	0	0	0	0	0	0	0	0	0	0	0	0	0	0	0	0
713	DE-0181159	NA	NA	NA	53	55	f	l	f	NaN	r	0	gb	0	0	0	0	0	0	0	0	0	0	0	NaN	5	0	0	NA	NA	0	NA	NA	0	0	0	0	0	0	0	0	0	0	0	0	0	0	0	0
714	DE-0181164	NA	NA	NA	31	31	f	ml	po	NaN	l	0	gb	0	0	0	0	0	0	0	0	0	0	0	NaN	4	0	0	NA	NA	NA	NA	NA	0	0	0	0	0	0	0	0	0	0	0	0	0	0	0	0
715	DE-0181333	NA	NA	NA	46	46	m	l	f	NaN	l	0	gb	0	0	0	0	0	0	0	1	0	0	0	NaN	NA	NA	NA	NA	NA	0	NA	NA	NA	NA	NA	NA	NA	NA	NA	NA	NA	NA	NA	NA	NA	NA	NA	NA
716	DE-0181339	NA	NA	NA	43	44	m	l	f	NaN	l	0	gb	0	0	0	0	0	0	0	0	0	0	0	NaN	1	0	0	NA	NA	0	NA	NA	0	0	0	0	0	0	0	0	0	0	0	0	0	0	0	0
717	DE-0181372	NA	NA	NA	62	62	m	l	t	NaN	r	0	gb	1	0	0	0	0	0	0	0	0	0	0	NaN	NA	NA	NA	NA	NA	0	NA	NA	NA	NA	NA	NA	NA	NA	NA	NA	NA	NA	NA	NA	NA	NA	NA	NA
718	DE-0181497	NA	NA	NA	58	58	m	ml	fp	NaN	r	0	gb	0	0	0	0	0	1	0	0	0	0	0	NaN	4	0	0	NA	NA	0	NA	NA	0	0	0	0	0	0	0	0	0	0	0	0	0	0	0	0
719	DE-0181634	NA	NA	NA	73	75	m	l	p	NaN	r	0	gb	0	0	0	0	0	0	0	0	0	0	0	NaN	NA	NA	NA	NA	NA	NA	NA	NA	NA	NA	NA	NA	NA	NA	NA	NA	NA	NA	NA	NA	NA	NA	NA	NA
720	DE-0181639	NA	NA	NA	50	50	f	l	f	NaN	r	0	gb	0	0	0	0	0	0	0	0	0	0	0	NaN	4	0	0	NA	NA	0	NA	NA	0	0	0	0	0	0	0	0	0	0	0	0	0	0	0	0
721	DE-0181768	NA	NA	NA	53	53	m	l	f	NaN	r	0	gb	0	0	0	0	0	0	0	0	0	0	0	NaN	4	0	0	NA	NA	0	NA	NA	0	0	0	0	0	0	0	0	0	0	1	0	0	0	0	0
722	DE-0181787	NA	NA	NA	55	55	m	l	f	NaN	l	0	gb	0	0	0	0	0	0	0	0	0	0	0	NaN	NA	NA	NA	NA	NA	0	NA	NA	NA	NA	NA	NA	NA	NA	NA	NA	NA	NA	NA	NA	NA	NA	NA	NA
723	DE-0181801	NA	NA	NA	83	83	f	B	B	NaN	NA	0	gb	0	0	0	0	0	0	0	0	0	0	0	NaN	4	0	0	NA	NA	0	NA	NA	0	0	0	0	0	0	0	0	0	0	0	0	0	0	0	0
724	DE-0181851	NA	NA	NA	55	55	f	l	f	NaN	r	0	gb	0	0	0	0	0	0	0	0	0	0	0	NaN	2	0	0	NA	NA	NA	NA	NA	0	0	0	0	0	0	0	0	0	0	0	0	0	0	0	0
725	DE-0181895	NA	NA	NA	78	78	f	l	t	NaN	l	0	gb	0	0	1	0	0	0	0	0	0	0	0	NaN	NA	NA	NA	NA	NA	0	NA	NA	NA	NA	NA	NA	NA	NA	NA	NA	NA	NA	NA	NA	NA	NA	NA	NA
726	DE-0182031	NA	NA	NA	67	67	m	l	t	NaN	r	0	gb	0	0	0	0	0	0	0	0	0	0	0	NaN	NA	NA	NA	NA	NA	0	NA	NA	NA	NA	NA	NA	NA	NA	NA	NA	NA	NA	NA	NA	NA	NA	NA	NA
727	DE-0182036	NA	NA	NA	47	48	m	B	B	NaN	NA	0	gb	1	0	0	0	0	0	0	0	0	1	0	NaN	NA	NA	NA	NA	NA	NA	NA	NA	NA	NA	NA	NA	NA	NA	NA	NA	NA	NA	NA	NA	NA	NA	NA	NA
728	DE-0182127	NA	NA	NA	62	62	f	l	f	NaN	r	0	gb	1	0	0	0	0	0	0	0	0	0	0	NaN	6	0	0	NA	NA	0	NA	NA	0	0	0	0	0	0	0	0	0	0	0	0	0	0	0	0
729	DE-0182298	NA	NA	NA	62	62	m	l	t	NaN	NA	0	gb	0	0	0	0	0	0	0	0	0	0	0	NaN	3	0	0	NA	NA	0	NA	NA	0	0	0	0	0	0	0	0	0	0	0	0	0	0	0	0
730	DE-0182307	NA	NA	NA	45	45	f	l	t	NaN	r	0	gb	0	0	0	0	0	0	0	0	0	0	0	NaN	7	0	0	NA	NA	0	NA	NA	0	0	0	0	0	0	0	0	0	0	0	0	0	0	0	0
731	DE-0182348	NA	NA	NA	73	73	f	l	t	NaN	l	0	gb	0	0	1	0	0	0	0	0	0	0	0	NaN	NA	NA	NA	NA	NA	NA	NA	NA	NA	NA	NA	NA	NA	NA	NA	NA	NA	NA	NA	NA	NA	NA	NA	NA
732	DE-0182449	NA	NA	NA	62	63	f	l	p	NaN	l	0	gb	0	0	0	0	0	0	0	0	0	0	0	NaN	NA	NA	NA	NA	NA	0	NA	NA	NA	NA	NA	NA	NA	NA	NA	NA	NA	NA	NA	NA	NA	NA	NA	NA
733	DE-0182461	NA	NA	NA	56	56	m	l	f	NaN	l	0	gb	0	0	1	0	0	0	0	0	0	0	0	NaN	3	0	0	NA	NA	0	NA	NA	0	0	0	0	0	0	0	0	0	0	0	0	0	0	0	0
734	DE-0182552	NA	NA	NA	75	75	m	l	p	NaN	l	0	gb	0	0	1	0	0	0	0	0	0	0	0	NaN	3	0	0	NA	NA	0	NA	NA	0	0	0	0	0	0	0	0	0	0	0	0	0	0	0	0
735	DE-0182698	NA	NA	NA	25	25	f	IT	4V	NaN	c	0	gb	1	0	1	0	0	0	0	0	0	0	0	NaN	6	0	0	NA	NA	0	NA	NA	0	0	0	0	0	0	0	0	0	0	0	0	0	0	0	0
736	DE-0182829	NA	NA	NA	60	60	f	B	B	NaN	NA	0	gb	0	0	0	0	0	0	0	0	0	0	0	NaN	3	0	0	NA	NA	0	NA	NA	0	0	0	0	0	0	0	0	0	0	0	0	0	0	0	0
737	DE-0182889	NA	NA	NA	55	55	m	l	f	NaN	r	0	gb	0	1	0	0	0	0	0	0	0	0	0	NaN	6	0	0	NA	NA	0	NA	NA	0	0	0	0	0	0	0	0	0	0	0	0	0	0	0	0
738	DE-0183109	NA	NA	NA	54	55	m	l	t	NaN	NA	0	gb	0	0	0	0	0	0	0	0	0	0	0	NaN	NA	NA	NA	NA	NA	0	NA	NA	NA	NA	NA	NA	NA	NA	NA	NA	NA	NA	NA	NA	NA	NA	NA	NA
739	DE-0183132	NA	NA	NA	67	68	f	l	f	NaN	r	0	gb	0	0	0	0	0	0	0	0	0	0	0	NaN	NA	NA	NA	NA	NA	NA	NA	NA	NA	NA	NA	NA	NA	NA	NA	NA	NA	NA	NA	NA	NA	NA	NA	NA
740	DE-0183141	NA	NA	NA	59	59	m	l	f	NaN	r	0	gb	0	0	0	0	0	0	0	0	0	0	0	NaN	4	0	0	NA	NA	0	NA	NA	0	0	0	0	0	0	0	0	0	0	0	0	0	0	0	0
741	DE-0183155	NA	NA	NA	55	57	m	l	t	NaN	NA	0	gb	0	0	0	0	0	0	0	0	0	0	0	NaN	NA	NA	NA	NA	NA	0	NA	NA	NA	NA	NA	NA	NA	NA	NA	NA	NA	NA	NA	NA	NA	NA	NA	NA
742	DE-0183181	NA	NA	NA	48	50	f	l	o	NaN	r	1	gb	0	0	0	0	0	0	0	0	0	0	0	NaN	4	0	0	NA	NA	0	NA	NA	0	0	0	0	0	0	0	0	0	0	0	0	0	0	0	0
743	DE-0183203	NA	NA	NA	49	49	m	l	o	NaN	NA	0	gb	0	0	0	0	0	0	0	0	0	0	0	NaN	4	0	0	NA	NA	0	NA	NA	0	0	0	0	0	0	0	0	0	0	0	0	0	0	0	0
744	DE-0183329	NA	NA	NA	55	55	f	B	B	NaN	NA	1	gb	0	0	0	0	0	0	0	0	0	0	0	NaN	4	0	0	NA	NA	0	NA	NA	0	0	0	0	0	0	0	0	0	0	0	0	0	0	0	0
745	DE-0183383	NA	NA	NA	66	66	f	l	t	NaN	l	0	gb	0	0	0	0	0	0	0	0	0	0	0	NaN	8	0	0	NA	NA	0	NA	NA	0	0	0	0	0	0	0	0	0	0	0	0	0	0	0	0
746	DE-0183449	NA	NA	NA	58	58	m	l	t	NaN	r	0	gb	1	0	0	0	0	0	0	0	0	0	0	NaN	6	0	0	NA	NA	0	NA	NA	0	0	0	0	0	0	0	0	0	0	0	0	0	0	0	0
747	DE-0183496	NA	NA	NA	25	25	m	l	o	NaN	r	0	gb	0	0	1	0	0	0	0	0	0	0	0	NaN	5	0	0	NA	NA	0	NA	NA	0	0	0	0	0	0	0	0	0	0	0	0	0	0	0	0
748	DE-0183512	NA	NA	NA	63	63	m	l	f	NaN	l	0	gb	1	0	0	0	0	0	0	0	0	0	0	NaN	NA	NA	NA	NA	NA	0	NA	NA	NA	NA	NA	NA	NA	NA	NA	NA	NA	NA	NA	NA	NA	NA	NA	NA
749	DE-0183520	NA	NA	NA	49	50	m	B	B	NaN	NA	0	gb	0	0	0	0	0	0	0	0	0	0	0	NaN	6	0	0	NA	NA	0	NA	NA	0	0	0	0	0	0	0	0	0	0	0	0	0	0	0	0
750	DE-0183601	NA	NA	NA	62	62	m	l	t	NaN	r	0	gb	0	0	0	0	0	0	0	0	0	0	0	NaN	1	0	0	NA	NA	0	NA	NA	0	0	0	0	0	0	0	0	0	0	0	0	0	0	0	0
751	DE-0183706	NA	NA	NA	49	50	f	l	p	NaN	l	0	gb	0	0	0	0	0	0	0	0	0	0	0	NaN	4	0	0	NA	NA	0	NA	NA	0	0	0	0	0	0	0	0	0	0	0	0	0	0	0	0
752	DE-0183725	NA	NA	NA	21	21	m	B	IV	NaN	l	0	gb	0	0	0	0	0	0	0	0	0	0	0	NaN	4	0	0	NA	NA	0	NA	NA	0	0	0	0	0	0	0	0	0	0	0	0	0	0	0	0
753	DE-0183746	NA	NA	NA	50	53	m	l	t	NaN	l	0	gb	0	0	1	0	0	0	0	0	0	0	0	NaN	NA	NA	NA	NA	NA	0	NA	NA	NA	NA	NA	NA	NA	NA	NA	NA	NA	NA	NA	NA	NA	NA	NA	NA
754	DE-0183955	NA	NA	NA	50	52	m	l	t	NaN	r	0	gb	0	0	0	0	0	0	0	0	0	0	0	NaN	NA	NA	NA	NA	NA	NA	NA	NA	NA	NA	NA	NA	NA	NA	NA	NA	NA	NA	NA	NA	NA	NA	NA	NA
755	DE-0183958	NA	NA	NA	64	68	m	l	p	NaN	l	0	gb	0	0	0	0	0	0	0	0	0	0	0	NaN	4	0	0	NA	NA	0	NA	NA	0	0	0	0	0	0	0	0	0	0	0	0	0	0	0	0
756	DE-0183962	NA	NA	NA	39	39	m	B	B	NaN	NA	0	gb	0	0	0	0	0	0	0	0	0	0	0	NaN	11	0	0	NA	NA	0	NA	NA	0	0	0	0	0	0	0	0	0	0	0	0	0	0	0	0
757	DE-0183991	NA	NA	NA	81	81	m	B	B	NaN	NA	0	gb	0	1	0	0	0	0	0	0	0	0	0	NaN	NA	NA	NA	NA	NA	NA	NA	NA	NA	NA	NA	NA	NA	NA	NA	NA	NA	NA	NA	NA	NA	NA	NA	NA
758	DE-0184020	NA	NA	NA	47	47	f	B	B	NaN	NA	0	gb	0	0	0	0	0	0	0	0	0	0	0	NaN	4	0	0	NA	NA	0	NA	NA	0	0	0	0	0	0	0	0	0	0	0	0	0	0	0	0
759	DE-0184096	NA	NA	NA	77	77	m	l	f	NaN	r	0	gb	0	0	0	0	0	0	0	0	0	0	0	NaN	4	0	0	NA	NA	0	NA	NA	0	0	0	0	0	0	0	0	0	0	0	0	0	0	0	0
760	DE-0184267	NA	NA	NA	54	54	f	l	p	NaN	r	1	gb	0	0	0	0	0	0	0	0	0	0	0	sarcomatous features	2	0	0	NA	NA	0	NA	NA	0	0	0	0	0	0	0	0	0	0	0	0	0	0	0	0
761	DE-0184268	NA	NA	NA	64	65	f	l	t	NaN	l	0	gb	1	0	0	0	0	0	0	0	0	0	0	NaN	4	0	0	NA	NA	0	NA	NA	0	0	0	0	0	0	0	0	0	0	0	0	0	0	0	0
762	DE-0184479	NA	NA	NA	57	60	m	l	t	NaN	l	0	gb	0	0	0	0	0	0	0	0	0	0	0	NaN	17	1	0	NA	NA	NA	NA	NA	0	0	0	0	0	0	0	0	0	0	0	0	0	0	0	0
763	DE-0184480	NA	NA	NA	43	48	m	l	f	NaN	NA	1	gb	0	0	0	0	0	0	0	0	0	0	0	NaN	1	0	0	NA	NA	0	NA	NA	0	0	0	0	0	0	0	0	0	0	0	0	0	0	0	0
764	DE-0184516	NA	NA	NA	76	76	m	l	t	NaN	r	0	gb	0	0	0	0	0	0	0	0	0	0	0	NaN	4	0	0	NA	NA	0	NA	NA	0	0	0	0	0	0	0	0	0	0	0	0	0	0	0	0
765	DE-0184530	NA	NA	NA	61	61	f	ml	fp	NaN	l	0	gb	0	0	1	0	0	0	0	0	0	0	0	NaN	8	0	0	NA	NA	NA	NA	NA	0	0	0	0	0	0	0	0	0	0	0	0	0	0	0	0
766	DE-0184550	NA	NA	NA	55	55	m	l	p	NaN	l	0	gb	0	0	0	0	0	0	0	0	0	0	0	NaN	NA	NA	NA	NA	NA	0	NA	NA	NA	NA	NA	NA	NA	NA	NA	NA	NA	NA	NA	NA	NA	NA	NA	NA
767	DE-0184658	NA	NA	NA	60	60	f	l	f	NaN	r	0	gb	0	0	0	0	0	0	0	0	0	0	0	NaN	6	0	0	NA	NA	0	NA	NA	0	0	0	0	0	0	0	0	0	0	0	0	0	0	0	0
768	DE-0184748	NA	NA	NA	63	63	m	l	p	NaN	l	1	gb	0	0	0	0	0	0	0	0	0	0	0	NaN	4	0	0	NA	NA	0	NA	NA	0	0	0	0	0	0	0	0	0	0	0	0	0	0	0	0
769	DE-0184807	NA	NA	NA	66	66	f	ml	ft	NaN	l	0	gb	1	0	0	0	0	0	0	0	0	0	0	NaN	NA	NA	NA	NA	NA	0	NA	NA	NA	NA	NA	NA	NA	NA	NA	NA	NA	NA	NA	NA	NA	NA	NA	NA
770	DE-0184887	NA	NA	NA	59	59	m	l	p	NaN	r	0	gb	0	0	0	0	0	0	0	0	0	0	0	NaN	4	0	0	NA	NA	0	NA	NA	0	0	0	0	0	0	0	0	0	0	0	0	0	0	0	0
771	DE-0184893	NA	NA	NA	85	85	m	l	t	NaN	r	0	gb	0	0	0	0	0	0	0	0	0	0	0	NaN	3	0	0	NA	NA	0	NA	NA	0	0	0	0	0	0	0	0	0	0	0	0	0	0	0	0
772	DE-0184905	NA	NA	NA	72	72	f	l	f	NaN	l	0	gb	0	0	1	0	0	0	0	0	0	0	0	NaN	1	0	0	NA	NA	0	NA	NA	0	0	0	0	0	0	0	0	0	0	0	0	0	0	0	0
773	DE-0184920	NA	NA	NA	36	36	f	l	f	NaN	r	0	gb	0	0	0	0	0	0	0	0	0	0	0	NaN	6	0	0	NA	NA	0	NA	NA	0	0	0	0	0	0	0	0	0	0	0	0	0	0	0	0
774	DE-0184930	NA	NA	NA	59	61	f	l	p	NaN	l	0	gb	0	0	0	0	0	0	0	0	0	0	0	NaN	4	0	0	NA	NA	0	NA	NA	0	0	0	0	0	0	0	0	0	0	0	0	0	0	0	0
775	DE-0185007	NA	NA	NA	55	55	m	l	f	NaN	r	0	gb	0	0	1	0	0	0	0	0	0	0	0	NaN	4	0	0	NA	NA	NA	NA	NA	0	0	0	0	0	0	0	0	0	0	0	0	0	0	0	0
776	DE-0185009	NA	NA	NA	58	58	m	l	p	NaN	r	0	gb	1	0	0	0	0	0	0	0	0	0	0	NaN	1	0	0	NA	NA	0	NA	NA	0	0	0	0	0	0	0	0	0	0	0	0	0	0	0	0
777	DE-0185212	NA	NA	NA	64	74	f	l	o	NaN	l	0	gb	0	0	0	0	0	0	0	0	0	0	0	NaN	4	0	0	NA	NA	0	NA	NA	0	0	0	0	0	0	0	0	0	0	0	0	0	0	0	0
778	DE-0185282	NA	NA	NA	70	70	m	l	f	NaN	l	0	gb	0	0	1	0	0	0	0	0	0	0	0	NaN	11	0	0	NA	NA	0	NA	NA	0	0	0	0	0	0	0	0	0	0	0	0	0	0	0	0
779	DE-0185398	NA	NA	NA	35	35	m	ml	fp	NaN	l	0	gb	0	0	0	0	0	0	0	0	0	0	0	NaN	32	1	1	NA	NA	0	NA	NA	0	0	0	0	0	0	0	0	0	0	0	0	0	0	0	0
780	DE-0185436	NA	NA	NA	50	50	f	l	t	NaN	r	0	gb	0	0	0	0	0	0	0	0	0	0	0	NaN	NA	NA	NA	NA	NA	0	NA	NA	NA	NA	NA	NA	NA	NA	NA	NA	NA	NA	NA	NA	NA	NA	NA	NA
781	DE-0185437	NA	NA	NA	68	68	f	l	o	NaN	r	0	gb	0	0	0	0	0	0	0	0	0	0	0	NaN	NA	NA	NA	NA	NA	0	NA	NA	NA	NA	NA	NA	NA	NA	NA	NA	NA	NA	NA	NA	NA	NA	NA	NA
782	DE-0185448	NA	NA	NA	78	78	m	l	f	NaN	r	0	gb	0	0	1	0	0	0	0	0	0	0	0	NaN	NA	NA	NA	NA	NA	0	NA	NA	NA	NA	NA	NA	NA	NA	NA	NA	NA	NA	NA	NA	NA	NA	NA	NA
783	DE-0185509	NA	NA	NA	78	78	m	ml	to	NaN	r	0	gb	0	0	0	0	0	0	0	0	0	0	0	NaN	NA	NA	NA	NA	NA	0	NA	NA	NA	NA	NA	NA	NA	NA	NA	NA	NA	NA	NA	NA	NA	NA	NA	NA
784	DE-0185511	NA	NA	NA	42	43	f	l	t	NaN	NA	0	gb	0	0	0	0	0	0	0	0	0	0	0	NaN	4	0	0	NA	NA	0	NA	NA	0	0	0	0	0	0	0	0	0	0	0	0	0	0	0	0
785	DE-0185539	NA	NA	NA	72	72	m	B	B	NaN	NA	0	gb	0	0	0	0	0	0	0	0	0	0	0	NaN	NA	NA	NA	NA	NA	0	NA	NA	NA	NA	NA	NA	NA	NA	NA	NA	NA	NA	NA	NA	NA	NA	NA	NA
786	DE-0185553	NA	NA	NA	3	4	f	IT	IT	NaN	NA	0	gb	0	0	1	0	0	0	0	0	0	0	0	NaN	3	0	0	NA	NA	0	NA	NA	0	0	0	0	0	0	0	0	0	0	0	0	0	0	0	0
787	DE-0185563	NA	NA	NA	37	37	f	ml	ft	NaN	l	0	gb	0	0	0	0	0	0	0	0	0	0	0	NaN	4	0	0	NA	NA	0	NA	NA	0	0	0	0	0	0	0	0	0	0	0	0	0	0	0	0
788	DE-0185594	NA	NA	NA	65	65	f	B	B	NaN	NA	0	gb	0	0	0	0	0	0	0	0	0	0	0	NaN	4	0	0	NA	NA	0	NA	NA	0	0	0	0	0	0	0	0	0	0	0	0	0	0	0	0
789	DE-0185682	NA	NA	NA	38	38	f	l	f	NaN	l	0	gb	1	0	0	0	0	0	0	0	0	0	0	NaN	3	0	0	NA	NA	0	NA	NA	0	0	0	0	0	0	0	0	0	0	0	0	0	0	0	0
790	DE-0185761	NA	NA	NA	68	68	f	l	p	NaN	r	0	gb	0	0	0	0	0	0	0	0	0	0	0	NaN	3	0	0	NA	NA	0	NA	NA	0	0	0	0	0	0	0	0	0	0	0	0	0	0	0	0
791	DE-0185776	NA	NA	NA	55	56	f	l	f	NaN	r	0	gb	0	0	1	0	0	0	0	0	0	0	0	NaN	4	0	0	NA	NA	0	NA	NA	0	0	0	0	0	0	0	0	0	0	0	0	0	0	0	0
792	DE-0185801	NA	NA	NA	27	32	f	l	f	NaN	l	0	gb	0	0	1	0	0	0	0	0	0	0	0	NaN	2	0	0	NA	NA	0	NA	NA	0	0	0	0	0	0	0	0	0	0	0	0	0	0	0	0
793	DE-0185895	NA	NA	NA	58	58	m	l	t	NaN	l	0	gb	0	0	0	0	0	0	0	0	0	0	0	NaN	6	0	0	NA	NA	0	NA	NA	0	0	0	0	0	0	0	0	0	0	0	0	0	0	0	0
794	DE-0185927	NA	NA	NA	64	64	m	l	o	NaN	NA	0	gb	0	0	1	0	0	0	0	0	0	0	0	NaN	1	0	0	NA	NA	0	NA	NA	0	0	0	0	0	0	0	0	0	0	0	0	0	0	0	0
795	DE-0186164	NA	NA	NA	33	33	m	l	o	NaN	r	0	gb	0	0	1	0	0	0	0	0	0	0	0	NaN	NA	NA	NA	NA	NA	0	NA	NA	NA	NA	NA	NA	NA	NA	NA	NA	NA	NA	NA	NA	NA	NA	NA	NA
796	DE-0186242	NA	NA	NA	63	64	m	l	p	NaN	l	0	gb	0	0	0	0	0	0	0	0	0	0	0	NaN	NA	NA	NA	NA	NA	NA	NA	NA	NA	NA	NA	NA	NA	NA	NA	NA	NA	NA	NA	NA	NA	NA	NA	NA
797	DE-0186294	NA	NA	NA	61	61	f	l	f	NaN	r	0	gb	0	0	0	0	0	0	0	0	0	0	0	NaN	6	0	0	NA	NA	0	NA	NA	0	0	0	0	0	0	0	0	0	0	0	0	0	0	0	0
798	DE-0186353	NA	NA	NA	62	62	f	l	f	NaN	l	0	gb	0	0	0	0	0	0	0	0	0	0	0	NaN	5	0	0	NA	NA	NA	NA	NA	0	0	0	0	0	0	0	0	0	0	0	1	0	0	0	0
799	DE-0186388	NA	NA	NA	69	69	m	l	p	NaN	l	0	gb	0	1	0	0	0	0	0	0	0	0	0	NaN	9	0	0	NA	NA	0	NA	NA	0	0	0	0	0	0	0	0	0	0	0	0	0	0	0	0
800	DE-0186421	NA	NA	NA	62	63	m	l	f	NaN	r	0	gb	0	0	0	0	0	0	0	0	0	0	0	NaN	4	0	0	NA	NA	NA	NA	NA	0	0	0	0	0	0	0	0	0	0	0	0	0	0	0	0
801	DE-0186446	NA	NA	NA	64	64	f	l	f	NaN	r	0	gb	0	0	0	0	0	0	0	0	0	0	0	NaN	6	0	0	NA	NA	0	NA	NA	0	0	0	0	0	0	0	0	0	0	0	0	0	0	0	0
802	DE-0186477	NA	NA	NA	57	57	f	l	t	NaN	l	0	gb	0	0	0	0	0	0	0	0	0	0	0	NaN	6	0	0	NA	NA	0	NA	NA	0	0	0	0	0	0	0	0	0	0	0	0	0	0	0	0
803	DE-0186722	NA	NA	NA	66	66	m	l	t	NaN	l	0	gb	0	0	1	0	0	0	0	0	0	0	0	NaN	NA	NA	NA	NA	NA	0	NA	NA	NA	NA	NA	NA	NA	NA	NA	NA	NA	NA	NA	NA	NA	NA	NA	NA
804	DE-0186749	NA	NA	NA	60	60	m	l	t	NaN	r	0	gb	1	1	0	0	0	0	0	0	0	0	0	NaN	4	0	0	NA	NA	NA	NA	NA	0	0	0	0	0	0	0	0	0	0	0	0	0	0	0	0
805	DE-0186813	NA	NA	NA	53	53	f	B	B	NaN	NA	0	gb	0	1	0	0	0	0	0	0	0	0	0	NaN	4	0	0	NA	NA	NA	NA	NA	0	0	0	0	0	0	0	0	0	0	0	0	0	0	0	0
806	DE-0186861	NA	NA	NA	54	54	m	l	t	NaN	r	0	gb	1	0	0	0	0	0	0	0	0	0	0	NaN	NA	NA	NA	NA	NA	NA	NA	NA	NA	NA	NA	NA	NA	NA	NA	NA	NA	NA	NA	NA	NA	NA	NA	NA
807	DE-0186876	NA	NA	NA	59	59	m	l	f	NaN	l	0	gb	0	1	0	0	0	0	0	0	0	0	0	NaN	5	0	0	NA	NA	0	NA	NA	0	0	0	0	0	0	0	0	0	0	0	0	0	0	0	0
808	DE-0186881	NA	NA	NA	56	56	f	l	f	NaN	l	0	gb	0	0	1	0	0	0	0	0	0	0	0	NaN	NA	NA	NA	NA	NA	NA	NA	NA	NA	NA	NA	NA	NA	NA	NA	NA	NA	NA	NA	NA	NA	NA	NA	NA
809	DE-0186897	NA	NA	NA	40	40	f	l	f	NaN	r	0	gb	0	0	1	0	0	0	0	0	0	0	0	NaN	5	0	0	NA	NA	0	NA	NA	0	0	0	0	0	0	0	0	0	0	0	0	0	0	0	0
810	DE-0186926	NA	NA	NA	46	46	f	B	B	NaN	NA	1	gb	0	0	0	0	0	0	0	0	0	0	0	NaN	5	0	0	NA	NA	0	NA	NA	0	0	0	0	0	0	0	0	0	0	0	0	0	0	0	0
811	DE-0186998	NA	NA	NA	71	71	m	l	p	NaN	l	0	gb	0	0	0	0	0	0	0	0	0	0	0	NaN	3	0	0	NA	NA	0	NA	NA	0	0	0	0	0	0	0	0	0	0	0	0	0	0	0	0
812	DE-0187102	NA	NA	NA	70	70	m	l	p	NaN	l	0	gb	0	0	0	0	0	0	0	0	0	0	0	NaN	4	0	0	NA	NA	0	NA	NA	0	0	0	0	0	0	0	0	0	0	0	0	0	0	0	0
813	DE-0187117	NA	NA	NA	49	49	f	l	t	NaN	l	0	gb	0	0	1	0	0	0	0	0	0	0	0	NaN	NA	NA	NA	NA	1	0	NA	NA	NA	NA	NA	NA	NA	NA	NA	NA	NA	NA	NA	NA	NA	NA	NA	NA
814	DE-0187133	NA	NA	NA	49	50	f	B	B	NaN	NA	0	gb	0	0	0	0	0	0	0	0	0	0	0	NaN	NA	NA	NA	NA	NA	0	NA	NA	NA	NA	NA	NA	NA	NA	NA	NA	NA	NA	NA	NA	NA	NA	NA	NA
815	DE-0187359	NA	NA	NA	69	69	m	B	B	NaN	NA	0	gb	0	0	0	0	0	0	0	0	0	0	0	NaN	5	0	0	NA	NA	0	NA	NA	0	0	0	0	0	0	0	0	0	0	0	0	0	0	0	0
816	DE-0187364	NA	NA	NA	52	52	f	l	t	NaN	r	0	gb	0	0	0	0	0	0	0	0	0	0	0	NaN	6	0	0	NA	NA	0	NA	NA	0	0	0	0	0	0	0	0	0	0	0	0	0	0	0	0
817	DE-0187370	NA	NA	NA	52	52	f	l	t	NaN	r	0	gb	0	0	0	0	0	0	0	0	0	0	0	NaN	4	0	0	NA	NA	0	NA	NA	0	0	0	0	0	0	0	0	0	0	0	0	0	0	0	0
818	DE-0187385	NA	NA	NA	71	72	f	l	t	NaN	NA	0	gb	0	0	0	0	0	0	0	0	0	0	0	NaN	6	0	0	NA	NA	0	NA	NA	0	0	0	0	0	0	0	0	0	0	0	0	0	0	0	0
819	DE-0187443	NA	NA	NA	66	66	m	l	t	NaN	l	0	gb	1	0	0	0	0	0	0	0	0	0	0	NaN	6	0	0	NA	NA	0	NA	NA	0	0	0	0	0	0	0	0	0	0	0	0	0	0	0	0
820	DE-0187535	NA	NA	NA	67	67	f	l	f	NaN	r	0	gb	0	0	0	0	0	0	0	0	0	0	0	NaN	6	0	0	NA	NA	0	NA	NA	0	0	0	0	0	0	0	0	0	0	0	0	0	0	0	0
821	DE-0187616	NA	NA	NA	31	31	f	ml	po	NaN	l	0	gb	0	0	0	0	0	0	0	0	0	0	0	NaN	NA	NA	NA	NA	NA	NA	NA	NA	NA	NA	NA	NA	NA	NA	NA	NA	NA	NA	NA	NA	NA	NA	NA	NA
822	DE-0187639	NA	NA	NA	76	76	m	ml	po	NaN	r	0	gb	0	0	0	0	0	0	0	0	0	0	0	NaN	6	0	0	NA	NA	0	NA	NA	0	0	0	0	0	0	0	0	0	0	0	0	0	0	0	0
823	DE-0187700	NA	NA	NA	64	64	m	l	p	NaN	r	0	gb	0	0	0	0	0	0	0	0	0	0	0	NaN	NA	NA	NA	NA	NA	NA	NA	NA	NA	NA	NA	NA	NA	NA	NA	NA	NA	NA	NA	NA	NA	NA	NA	NA
824	DE-0187713	NA	NA	NA	70	71	m	l	f	NaN	r	0	gb	0	0	0	0	0	0	0	0	0	0	0	NaN	6	0	0	NA	NA	0	NA	NA	0	0	0	0	0	0	0	0	0	0	0	0	0	0	0	0
825	DE-0187740	NA	NA	NA	64	65	f	B	B	NaN	NA	0	gb	0	0	1	0	0	0	0	0	0	0	0	NaN	NA	NA	NA	NA	NA	NA	NA	NA	NA	NA	NA	NA	NA	NA	NA	NA	NA	NA	NA	NA	NA	NA	NA	NA
826	DE-0187742	NA	NA	NA	50	50	m	l	t	NaN	r	0	gb	0	0	0	0	0	0	0	0	0	0	0	NaN	3	0	0	NA	NA	0	NA	NA	0	0	0	0	0	0	0	0	0	0	0	0	0	0	0	0
827	DE-0187746	NA	NA	NA	46	53	f	ml	to	NaN	r	0	gb	0	0	0	1	0	0	0	0	0	0	0	NaN	NA	NA	NA	NA	NA	NA	NA	NA	NA	NA	NA	NA	NA	NA	NA	NA	NA	NA	NA	NA	NA	NA	NA	NA
828	DE-0187747	NA	NA	NA	63	64	m	l	t	NaN	r	0	gb	0	0	0	0	0	0	0	0	0	0	0	NaN	NA	NA	NA	NA	NA	NA	NA	NA	NA	NA	NA	NA	NA	NA	NA	NA	NA	NA	NA	NA	NA	NA	NA	NA
829	DE-0187905	NA	NA	NA	67	67	f	l	t	NaN	l	0	gb	0	0	0	0	0	0	0	0	0	0	0	NaN	NA	NA	NA	NA	NA	0	NA	NA	NA	NA	NA	NA	NA	NA	NA	NA	NA	NA	NA	NA	NA	NA	NA	NA
830	DE-0188059	NA	NA	NA	58	58	m	l	f	NaN	r	1	gb	0	0	0	0	0	0	0	0	0	0	0	sarcomatoid features	NA	NA	NA	NA	NA	0	NA	NA	NA	NA	NA	NA	NA	NA	NA	NA	NA	NA	NA	NA	NA	NA	NA	NA
831	DE-0188063	NA	NA	NA	72	73	m	l	f	NaN	r	0	gb	0	0	0	0	0	0	0	0	0	0	0	NaN	6	0	0	NA	NA	NA	NA	NA	0	0	0	0	0	0	0	0	0	0	0	0	0	0	0	0
832	DE-0188076	NA	NA	NA	68	68	f	l	o	NaN	r	0	gb	0	0	0	0	0	0	0	0	0	0	0	NaN	NA	NA	NA	NA	NA	NA	NA	NA	NA	NA	NA	NA	NA	NA	NA	NA	NA	NA	NA	NA	NA	NA	NA	NA
833	DE-0188111	NA	NA	NA	50	50	f	l	t	NaN	r	0	gb	0	0	0	0	0	0	0	0	0	0	0	NaN	NA	NA	NA	NA	NA	NA	NA	NA	NA	NA	NA	NA	NA	NA	NA	NA	NA	NA	NA	NA	NA	NA	NA	NA
834	DE-0188114	NA	NA	NA	69	69	f	l	f	NaN	l	0	gb	0	0	0	0	0	0	0	0	0	0	0	NaN	5	0	0	NA	NA	0	NA	NA	0	0	0	0	0	0	0	0	0	0	0	0	0	0	0	0
835	DE-0188129	NA	NA	NA	78	78	m	l	f	NaN	r	0	gb	0	0	1	0	0	0	0	0	0	0	0	NaN	NA	NA	NA	NA	NA	NA	NA	NA	NA	NA	NA	NA	NA	NA	NA	NA	NA	NA	NA	NA	NA	NA	NA	NA
836	DE-0188219	NA	NA	NA	67	67	m	l	f	NaN	l	0	gb	0	0	1	0	0	0	0	0	0	0	0	NaN	7	0	0	NA	NA	0	NA	NA	0	0	0	0	0	0	0	0	0	0	0	0	0	0	0	0
837	DE-0188264	NA	NA	NA	49	49	f	l	f	NaN	l	0	gb	0	0	0	0	0	0	0	0	0	0	0	NaN	10	0	0	NA	NA	0	NA	NA	0	0	0	0	0	0	0	0	0	0	0	0	0	0	0	0
838	DE-0188404	NA	NA	NA	63	63	m	l	t	NaN	l	0	gb	0	0	0	0	0	0	0	0	0	0	0	NaN	NA	NA	NA	NA	NA	NA	NA	NA	NA	NA	NA	NA	NA	NA	NA	NA	NA	NA	NA	NA	NA	NA	NA	NA
839	DE-0188652	NA	NA	NA	61	61	m	l	f	NaN	r	0	gb	0	0	0	0	0	0	0	0	0	0	0	NaN	NA	NA	NA	NA	NA	0	NA	NA	NA	NA	NA	NA	NA	NA	NA	NA	NA	NA	NA	NA	NA	NA	NA	NA
840	DE-0188788	NA	NA	NA	33	33	m	l	o	NaN	r	0	gb	0	0	0	0	0	0	0	0	0	0	0	NaN	NA	NA	NA	NA	NA	NA	NA	NA	NA	NA	NA	NA	NA	NA	NA	NA	NA	NA	NA	NA	NA	NA	NA	NA
841	DE-0188813	NA	NA	NA	50	50	m	l	f	NaN	r	0	gb	0	0	0	0	0	0	0	0	0	0	0	NaN	4	0	0	NA	NA	0	NA	NA	0	0	0	0	0	0	0	0	0	0	0	0	0	0	0	0
842	DE-0188945	NA	NA	NA	47	47	m	ST	CC	NaN	c	0	gb	0	0	0	0	0	0	0	0	0	0	0	NaN	2	0	0	NA	NA	0	NA	NA	0	0	0	0	0	0	0	0	0	0	0	0	0	0	0	0
843	DE-0189462	NA	NA	NA	22	22	m	B	B	NaN	NA	0	gb	0	0	0	0	0	0	0	0	0	0	0	NaN	5	0	0	NA	NA	0	NA	NA	0	0	0	0	0	0	0	0	0	0	0	0	0	0	0	0
844	DE-0189467	NA	NA	NA	48	49	f	l	f	NaN	l	1	gb	0	0	0	0	0	0	0	0	0	0	0	NaN	8	0	0	NA	NA	0	0	NA	0	0	0	0	0	0	0	0	0	0	0	0	0	0	0	0
845	DE-0189496	NA	NA	NA	67	67	m	l	f	NaN	l	0	gb	0	0	0	0	0	0	0	0	0	0	0	NaN	9	0	0	NA	NA	0	NA	NA	0	0	0	0	0	0	0	0	0	0	0	0	0	0	0	0
846	DE-0189502	NA	NA	NA	52	57	f	l	t	NaN	r	0	gb	0	0	0	0	0	0	0	0	0	0	0	NaN	6	0	0	NA	NA	0	NA	NA	0	0	0	0	0	0	0	0	0	0	0	0	0	0	0	0
847	DE-0189877	NA	NA	NA	62	63	m	ml	fp	NaN	r	0	gb	0	0	1	0	0	0	0	0	0	0	0	NaN	9	0	0	NA	NA	0	NA	NA	0	0	0	0	0	0	0	0	0	0	0	0	0	0	0	0
848	DE-0189892	NA	NA	NA	59	60	f	l	f	NaN	l	0	gb	0	0	0	0	0	0	0	0	0	0	0	NaN	2	0	0	NA	NA	0	NA	NA	0	0	0	0	0	0	0	0	0	0	0	0	0	0	0	0
849	DE-0189958	NA	NA	NA	62	63	f	l	p	NaN	l	0	gb	0	0	0	0	0	0	0	0	0	0	0	NaN	NA	NA	NA	NA	NA	NA	0	NA	NA	NA	NA	NA	NA	NA	NA	NA	NA	NA	NA	NA	NA	NA	NA	NA
850	DE-0189986	NA	NA	NA	79	79	m	l	f	NaN	r	0	gb	0	0	0	0	0	0	0	0	0	0	0	NaN	3	0	0	NA	NA	0	NA	NA	0	0	0	0	0	0	0	0	0	0	0	0	0	0	0	0
851	DE-0190037	NA	NA	NA	71	72	f	l	p	NaN	l	0	gb	0	0	0	0	0	0	0	0	0	0	0	NaN	4	0	0	NA	NA	0	NA	NA	0	0	0	0	0	0	0	0	0	0	0	0	0	0	0	0
852	DE-0190159	NA	NA	NA	55	55	m	l	f	NaN	r	0	gb	0	0	0	0	0	0	0	0	0	0	0	NaN	4	0	0	NA	NA	0	NA	NA	0	0	0	0	0	0	0	0	0	0	0	0	0	0	0	0
853	DE-0190179	NA	NA	NA	54	54	f	l	f	NaN	r	0	gb	0	0	0	0	0	0	0	0	0	0	0	NaN	22	1	1	NA	NA	0	NA	NA	0	0	0	0	0	0	0	0	0	0	0	0	0	0	0	0
854	DE-0190311	NA	NA	NA	68	68	m	B	B	NaN	l	0	gb	0	0	0	0	0	0	0	0	0	0	0	NaN	4	0	0	NA	NA	0	NA	NA	0	0	0	0	0	0	0	0	0	0	0	0	0	0	0	0
855	DE-0190444	NA	NA	NA	57	57	m	l	p	NaN	l	0	gb	0	0	0	0	0	0	0	0	0	0	0	NaN	7	0	0	NA	NA	0	NA	NA	0	0	0	0	0	0	0	0	0	0	0	0	0	0	0	0
856	DE-0190457	NA	NA	NA	65	65	f	ml	to	NaN	r	0	gb	0	0	1	0	0	0	0	0	0	0	0	NaN	5	0	0	NA	NA	0	NA	NA	0	0	0	0	0	0	0	0	0	0	0	0	0	0	0	0
857	DE-0190497	NA	NA	NA	58	58	m	l	t	NaN	l	0	gb	0	0	0	0	0	0	0	0	0	0	0	NaN	NA	NA	NA	NA	NA	NA	NA	NA	NA	NA	NA	NA	NA	NA	NA	NA	NA	NA	NA	NA	NA	NA	NA	NA
858	DE-0190500	NA	NA	NA	35	36	m	l	t	NaN	l	0	gb	0	0	1	0	0	0	0	0	0	0	0	NaN	3	0	0	NA	NA	0	NA	NA	0	0	0	0	0	0	0	0	0	0	0	0	0	0	0	0
859	DE-0190647	NA	NA	NA	58	58	f	B	B	NaN	NA	0	gb	0	0	0	0	0	0	0	0	0	0	0	NaN	6	0	0	NA	NA	0	NA	NA	0	0	0	0	0	0	0	0	0	0	0	0	0	0	0	0
860	DE-0190676	NA	NA	NA	55	56	m	B	B	NaN	NA	0	gb	0	0	0	0	0	0	0	0	0	0	0	NaN	1	0	0	NA	NA	0	NA	NA	0	0	0	0	0	0	0	0	0	0	0	0	0	0	0	0
861	DE-0190683	NA	NA	NA	62	62	m	l	o	NaN	l	0	gb	0	0	0	0	0	0	0	0	0	0	0	NaN	8	0	0	NA	NA	0	NA	NA	0	0	0	0	0	0	0	0	0	0	0	0	0	0	0	0
862	DE-0191577	NA	NA	NA	61	60	f	l	t	NaN	l	0	gb	0	0	0	0	0	0	0	0	0	0	0	NaN	3	0	0	NA	NA	0	NA	NA	0	0	0	0	0	0	0	0	0	0	0	0	0	0	0	0
863	DE-0191942	NA	NA	NA	31	31	m	l	t	NaN	l	0	gb	0	0	0	0	0	0	0	0	0	0	0	NaN	NA	NA	NA	NA	NA	0	NA	NA	NA	NA	NA	NA	NA	NA	NA	NA	NA	NA	NA	NA	NA	NA	NA	NA
864	DE-0192003	NA	NA	NA	67	68	f	l	p	NaN	r	0	gb	0	0	0	0	0	0	0	0	0	0	0	NaN	6	0	0	NA	NA	0	NA	NA	0	0	0	0	0	0	0	0	0	0	0	0	0	0	0	0
865	DE-0192093	NA	NA	NA	49	49	f	l	t	NaN	l	1	gb	0	0	0	0	0	0	0	0	0	0	0	NaN	89	1	0	NA	NA	0	NA	NA	0	0	0	0	0	0	0	0	0	0	0	0	0	0	0	0
866	DE-0192113	NA	NA	NA	49	50	m	l	t	NaN	NA	0	gb	0	0	0	0	0	0	0	0	0	0	0	NaN	6	0	0	NA	NA	0	NA	NA	0	0	0	0	0	0	0	0	0	0	0	0	0	0	0	0
867	DE-0192121	NA	NA	NA	52	52	f	l	t	NaN	r	0	gb	0	0	0	0	0	0	0	0	0	0	0	NaN	7	0	0	NA	NA	0	NA	NA	0	0	0	0	0	0	0	0	0	0	0	0	0	0	0	0
868	DE-0192790	NA	NA	NA	53	53	f	l	p	NaN	r	0	gb	0	0	0	0	0	0	0	0	0	0	0	NaN	7	0	0	NA	NA	0	NA	NA	0	0	0	0	0	0	0	0	0	0	0	0	0	0	0	0
869	DE-0193197	NA	NA	NA	72	72	f	l	t	NaN	l	0	gb	1	0	0	0	0	0	0	0	0	0	0	NaN	1	0	0	NA	NA	0	NA	NA	0	0	0	0	0	0	0	0	0	0	0	0	0	0	0	0
870	DE-0193201	NA	NA	NA	28	28	f	B	B	NaN	NA	0	gb	1	0	0	0	0	0	0	0	0	0	0	NaN	64	1	0	NA	NA	0	NA	NA	0	0	0	0	0	0	0	0	0	0	0	0	0	0	0	0
871	DE-0193259	NA	NA	NA	58	58	m	ml	po	NaN	r	0	gb	0	0	0	0	0	0	0	0	0	0	0	NaN	6	0	0	NA	NA	0	NA	NA	0	0	0	0	0	0	0	0	0	0	0	0	0	0	0	0
872	DE-0193306	NA	NA	NA	81	81	f	l	t	NaN	r	0	gb	0	0	0	0	0	0	0	0	0	0	0	NaN	8	0	0	NA	NA	0	NA	NA	0	0	0	0	0	0	0	0	0	0	0	0	0	0	0	0
873	DE-0193307	NA	NA	NA	82	82	m	l	p	NaN	l	0	gb	0	0	0	0	0	0	0	0	0	0	0	NaN	3	0	0	NA	NA	NA	NA	NA	0	0	0	0	0	0	0	0	0	0	0	0	0	0	0	0
874	DE-0193388	NA	NA	NA	52	53	f	l	t	NaN	r	0	gb	0	0	0	0	0	0	0	0	0	0	0	NaN	NA	NA	NA	NA	NA	NA	NA	NA	NA	NA	NA	NA	NA	NA	NA	NA	NA	NA	NA	NA	NA	NA	NA	NA
875	DE-0193433	NA	NA	NA	42	42	m	l	f	NaN	NA	0	gb	0	0	0	0	0	0	0	0	0	0	0	NaN	4	0	0	NA	NA	0	NA	NA	0	0	0	0	0	0	0	0	0	0	0	0	0	0	0	0
876	DE-0193509	NA	NA	NA	67	67	f	ST	TH	NaN	l	0	gb	0	0	1	0	0	0	0	0	0	0	0	NaN	6	0	0	NA	NA	NA	NA	NA	0	0	0	0	0	0	0	0	0	0	0	0	0	0	0	0
877	DE-0193514	NA	NA	NA	29	30	m	B	B	NaN	NA	0	gb	0	0	0	1	0	0	0	0	0	0	0	NaN	4	0	0	NA	NA	0	NA	NA	0	0	0	0	0	0	0	0	0	0	0	0	0	0	0	0
878	DE-0193766	NA	NA	NA	63	63	f	B	B	NaN	NA	0	gb	1	0	0	0	0	0	0	0	0	0	0	NaN	6	0	0	NA	NA	0	NA	NA	0	0	0	0	0	0	0	0	0	0	0	0	0	0	0	0
879	DE-0193808	NA	NA	NA	57	57	f	l	f	NaN	r	0	gb	0	0	0	0	0	0	0	0	0	0	0	NaN	NA	NA	NA	NA	NA	0	NA	NA	NA	NA	NA	NA	NA	NA	NA	NA	NA	NA	NA	NA	NA	NA	NA	NA
880	DE-0193818	NA	NA	NA	57	57	m	B	B	NaN	NA	0	gb	0	0	0	0	0	0	0	0	0	0	0	NaN	NA	NA	NA	NA	NA	NA	NA	NA	NA	NA	NA	NA	NA	NA	NA	NA	NA	NA	NA	NA	NA	NA	NA	NA
881	DE-0193894	NA	NA	NA	49	50	f	l	f	NaN	r	0	gb	0	0	0	0	0	0	0	0	0	0	0	NaN	4	0	0	NA	NA	0	NA	NA	0	0	0	0	0	0	0	0	0	0	0	0	0	0	0	0
882	DE-0193923	NA	NA	NA	17	19	m	IT	IT	NaN	NA	0	gb	0	0	0	0	0	0	0	0	0	0	0	NaN	3	0	0	NA	NA	0	NA	NA	0	0	0	0	0	0	0	0	0	0	0	0	0	0	0	0
883	DE-0194349	NA	NA	NA	42	42	m	l	f	NaN	NA	0	gb	0	0	0	0	0	0	0	0	0	0	0	NaN	4	0	0	NA	NA	0	NA	NA	0	0	0	0	0	0	0	0	0	0	0	0	0	0	0	0
884	DE-0194373	NA	NA	NA	64	64	m	l	t	NaN	NA	0	gb	0	0	0	0	0	0	0	0	0	0	0	NaN	7	0	0	NA	NA	0	NA	NA	0	0	0	0	0	0	0	0	0	0	0	0	0	0	0	0
885	DE-0194570	NA	NA	NA	60	60	m	l	t	NaN	NA	0	gb	0	0	0	0	0	0	0	0	0	0	0	NaN	6	0	0	NA	NA	0	NA	NA	0	0	0	0	0	0	0	0	0	0	0	0	0	0	0	0
886	DE-0194669	NA	NA	NA	59	59	m	l	p	NaN	r	0	gb	0	0	0	0	0	0	0	0	0	0	0	NaN	4	0	0	NA	NA	0	NA	NA	0	0	0	0	0	0	0	0	0	0	0	0	0	0	0	0
887	DE-0194683	NA	NA	NA	37	37	m	l	f	NaN	r	0	gb	0	0	1	0	0	0	0	0	0	0	0	NaN	9	0	0	NA	NA	0	NA	NA	0	0	0	0	0	0	0	0	0	0	0	0	0	0	0	0
888	DE-0194836	NA	NA	NA	74	74	m	B	B	NaN	NA	0	gb	0	0	1	0	0	0	0	0	0	0	0	NaN	4	0	0	NA	NA	0	NA	NA	0	0	0	0	0	0	0	0	0	0	0	0	0	0	0	0
889	DE-0194919	NA	NA	NA	79	79	f	ml	po	NaN	l	0	gb	0	0	0	0	0	0	0	0	0	0	0	NaN	5	0	0	NA	NA	NA	NA	NA	0	0	0	0	0	0	0	0	0	0	0	0	0	0	0	0
890	DE-0194968	NA	NA	NA	57	56	m	l	p	NaN	r	0	gb	0	0	0	0	0	0	0	0	0	0	0	NaN	5	0	0	NA	NA	0	NA	NA	0	0	0	0	0	0	0	0	0	0	0	0	0	0	0	0
891	DE-0195136	NA	NA	NA	66	67	m	l	t	NaN	r	0	gb	0	0	0	0	0	0	0	0	0	0	0	NaN	8	0	0	NA	NA	NA	NA	NA	0	0	0	0	0	0	0	0	0	0	0	0	0	0	0	0
892	DE-0195158	NA	NA	NA	51	51	f	l	t	NaN	l	0	gb	0	1	0	0	0	1	0	0	0	0	0	NaN	4	0	0	NA	NA	NA	NA	NA	0	0	0	0	0	0	0	0	0	0	0	0	0	0	0	0
893	DE-0195180	NA	NA	NA	62	62	f	l	p	NaN	l	0	gb	0	0	0	0	0	0	0	0	0	0	0	NaN	NA	NA	NA	NA	NA	NA	NA	NA	NA	NA	NA	NA	NA	NA	NA	NA	NA	NA	NA	NA	NA	NA	NA	NA
894	DE-0195189	NA	NA	NA	53	53	f	l	f	NaN	r	0	gb	0	0	0	0	0	0	0	0	0	0	0	NaN	6	0	0	NA	NA	NA	NA	NA	0	0	0	0	0	0	0	0	0	0	0	0	0	0	0	0
895	DE-0195237	NA	NA	NA	81	81	m	l	f	NaN	r	0	gb	0	0	0	0	0	0	0	0	0	0	0	NaN	4	0	0	NA	NA	NA	NA	NA	0	0	0	0	0	0	0	0	0	0	0	0	0	0	0	0
896	DE-0195239	NA	NA	NA	73	74	f	l	p	NaN	l	0	gb	0	0	0	0	0	0	0	0	0	0	0	NaN	NA	NA	NA	NA	NA	NA	NA	NA	NA	NA	NA	NA	NA	NA	NA	NA	NA	NA	NA	NA	NA	NA	NA	NA
897	DE-0195245	NA	NA	NA	49	50	m	l	t	NaN	NA	0	gb	0	0	0	0	0	0	0	0	0	0	0	NaN	NA	NA	NA	NA	NA	NA	NA	NA	NA	NA	NA	NA	NA	NA	NA	NA	NA	NA	NA	NA	NA	NA	NA	NA
898	DE-0195296	NA	NA	NA	50	50	f	ml	po	NaN	r	0	gb	0	0	0	0	0	0	0	0	0	0	0	NaN	10	0	0	NA	NA	NA	NA	NA	0	0	0	0	0	0	0	0	0	0	0	0	0	0	0	0
899	DE-0195335	NA	NA	NA	61	61	m	B	B	NaN	NA	0	gb	0	0	0	0	0	0	0	0	0	0	0	NaN	9	0	0	NA	NA	NA	NA	NA	0	0	0	0	0	0	0	0	0	0	0	0	0	0	0	0
900	DE-0195594	NA	NA	NA	72	72	m	l	f	NaN	l	0	gb	0	0	0	0	0	0	0	0	0	0	0	NaN	6	0	0	NA	NA	NA	NA	NA	0	0	0	0	0	0	0	0	0	0	0	0	0	0	0	0
901	DE-0195625	NA	NA	NA	53	53	m	l	f	NaN	l	0	gb	0	0	0	0	0	0	0	0	0	0	0	NaN	6	0	0	NA	NA	NA	NA	NA	0	0	0	0	0	0	0	0	0	0	0	0	0	0	0	0
902	DE-0195750	NA	NA	NA	55	55	f	l	p	NaN	l	0	gb	0	0	1	0	0	0	0	0	0	0	0	NaN	NA	NA	NA	NA	NA	NA	NA	NA	NA	NA	NA	NA	NA	NA	NA	NA	NA	NA	NA	NA	NA	NA	NA	NA
903	DE-0195803	NA	NA	NA	29	31	f	l	t	NaN	l	0	gb	0	0	0	0	0	0	0	0	0	0	0	NaN	6	0	0	NA	NA	NA	NA	NA	0	0	0	0	0	0	0	0	0	0	0	0	0	0	0	0
904	DE-0195843	NA	NA	NA	77	77	m	l	p	NaN	l	0	gb	0	0	0	0	0	0	0	0	0	0	0	NaN	6	0	0	NA	NA	NA	NA	NA	0	0	0	0	0	0	0	0	0	1	0	0	0	0	0	0
905	DE-0196272	NA	NA	NA	57	58	m	l	f	NaN	l	0	gb	1	0	0	0	0	0	0	0	0	0	0	NaN	NA	NA	NA	NA	NA	NA	NA	NA	NA	NA	NA	NA	NA	NA	NA	NA	NA	NA	NA	NA	NA	NA	NA	NA
906	DE-0196412	NA	NA	NA	67	67	m	l	f	NaN	l	0	gb	1	0	0	0	0	0	0	0	0	0	0	NaN	4	0	0	0	NA	0	NA	NA	0	0	0	0	0	0	0	0	0	0	0	0	0	0	0	0
907	DE-0196524	NA	NA	NA	53	58	m	l	p	NaN	l	0	gb	0	0	0	0	0	0	0	0	0	0	0	NaN	8	0	0	1	NA	NA	NA	NA	0	0	0	0	0	0	0	0	0	0	0	0	0	0	0	0
908	DE-0196540	NA	NA	NA	67	68	f	l	f	NaN	l	0	gb	0	0	0	0	0	0	0	0	0	0	0	NaN	6	0	0	NA	NA	NA	NA	NA	0	0	0	0	0	0	0	0	0	0	0	0	0	0	0	0
909	DE-0196560	NA	NA	NA	81	81	m	l	f	NaN	r	0	gb	0	0	0	0	0	0	0	0	0	0	0	NaN	NA	NA	NA	NA	NA	NA	NA	NA	NA	NA	NA	NA	NA	NA	NA	NA	NA	NA	NA	NA	NA	NA	NA	NA
910	DE-0196821	NA	NA	NA	71	71	f	l	t	NaN	l	0	gb	0	0	0	0	0	0	0	0	0	0	0	NaN	6	0	0	NA	NA	NA	NA	NA	0	0	0	0	0	0	0	0	0	0	0	0	0	0	0	0
911	DE-0196953	NA	NA	NA	62	62	m	l	t	NaN	l	0	gb	0	0	0	0	0	0	0	0	0	0	0	NaN	6	0	0	0	NA	0	NA	NA	0	0	0	0	0	0	0	0	0	0	0	0	0	0	0	0
912	DE-0197042	NA	NA	NA	68	68	m	l	p	NaN	r	0	gb	0	0	0	0	0	0	0	0	0	0	0	NaN	7	0	0	NA	NA	NA	NA	NA	0	0	0	0	0	0	0	0	0	0	0	0	0	0	0	0
913	DE-0197117	NA	NA	NA	41	41	m	l	f	NaN	r	0	gb	0	0	0	0	0	0	0	0	0	0	0	NaN	5	0	0	NA	NA	NA	NA	NA	0	0	0	0	0	0	0	0	0	0	0	0	0	0	0	0
914	DE-0197193	NA	NA	NA	57	57	f	l	t	NaN	l	0	gb	0	0	0	0	0	0	0	0	0	0	0	NaN	NA	NA	NA	NA	NA	NA	NA	NA	NA	NA	NA	NA	NA	NA	NA	NA	NA	NA	NA	NA	NA	NA	NA	NA
915	DE-0197344	NA	NA	NA	38	38	m	l	t	NaN	r	0	gb	0	0	0	0	0	0	0	0	0	0	0	NaN	NA	NA	NA	NA	NA	NA	NA	NA	NA	NA	NA	NA	NA	NA	NA	NA	NA	NA	NA	NA	NA	NA	NA	NA
916	DE-0197404	NA	NA	NA	49	49	f	ml	fp	NaN	r	0	gb	1	0	0	0	0	0	0	0	0	0	0	NaN	110	1	0	NA	NA	NA	NA	NA	0	0	0	0	0	0	0	0	0	0	0	0	0	0	0	0
917	DE-0197609	NA	NA	NA	58	59	m	l	f	NaN	NA	0	gb	0	0	0	0	0	0	0	0	0	0	0	NaN	5	0	0	NA	NA	NA	NA	NA	0	0	0	0	0	0	0	0	0	0	0	0	0	0	0	0
918	DE-0197628	NA	NA	NA	77	78	m	ml	tp	NaN	NA	0	gb	0	0	0	0	0	0	0	0	0	0	0	NaN	6	0	0	NA	NA	NA	NA	NA	0	0	0	0	0	0	0	0	0	0	0	0	0	0	0	0
919	DE-0197760	NA	NA	NA	60	61	f	l	t	NaN	l	0	gb	0	0	0	0	0	0	0	0	0	0	0	NaN	8	0	0	NA	NA	NA	NA	NA	0	0	0	0	0	0	0	0	0	0	0	0	0	0	0	0
920	DE-0197762	NA	NA	NA	72	72	f	l	p	NaN	r	0	gb	0	0	0	0	0	0	0	0	0	0	0	NaN	4	0	0	NA	NA	NA	NA	NA	0	0	0	0	0	0	0	0	0	0	0	0	0	0	0	0
921	DE-0197801	NA	NA	NA	60	60	m	l	t	NaN	l	0	gb	0	0	0	0	0	0	0	0	0	0	0	NaN	5	0	0	NA	NA	NA	NA	NA	0	0	0	0	0	0	0	0	0	0	0	0	0	0	0	0
922	DE-0197910	NA	NA	NA	62	62	f	l	f	NaN	r	0	gb	0	0	1	0	0	0	0	0	0	0	0	NaN	11	0	0	NA	NA	NA	NA	NA	0	0	0	0	0	0	0	0	0	0	0	0	0	0	0	0
923	DE-0197991	NA	NA	NA	66	66	f	l	p	NaN	l	1	gb	0	0	0	0	0	0	0	0	0	0	0	NaN	10	0	0	0	NA	0	NA	NA	0	0	0	0	0	0	0	0	0	0	0	0	0	0	0	0
924	DE-0198090	NA	NA	NA	10	11	m	l	p	NaN	r	0	gb	0	0	1	0	0	0	0	0	0	0	0	NaN	9	0	0	NA	NA	NA	NA	NA	0	0	0	0	0	0	0	0	0	0	0	0	0	0	0	0
925	DE-0198335	NA	NA	NA	49	50	m	l	o	NaN	NA	0	gb	0	0	0	0	0	0	0	0	0	0	0	NaN	NA	NA	NA	NA	NA	NA	NA	NA	NA	NA	NA	NA	NA	NA	NA	NA	NA	NA	NA	NA	NA	NA	NA	NA
926	DE-0198337	NA	NA	NA	62	64	f	l	p	NaN	l	0	gb	0	0	0	0	0	0	0	0	0	0	0	NaN	NA	NA	NA	NA	NA	NA	NA	NA	NA	NA	NA	NA	NA	NA	NA	NA	NA	NA	NA	NA	NA	NA	NA	NA
927	DE-0198357	NA	NA	NA	46	48	m	l	f	NaN	r	0	gb	0	0	0	0	0	0	0	0	0	0	0	NaN	NA	NA	NA	NA	NA	NA	NA	NA	NA	NA	NA	NA	NA	NA	NA	NA	NA	NA	NA	NA	NA	NA	NA	NA
928	DE-0198359	NA	NA	NA	58	58	f	l	t	NaN	l	0	gb	0	0	1	0	0	0	0	0	0	0	0	NaN	9	0	0	NA	NA	NA	NA	NA	0	0	0	0	0	0	0	0	0	0	0	0	0	0	0	0
929	DE-0198361	NA	NA	NA	21	22	m	B	IV	NaN	l	0	gb	0	0	0	0	0	0	0	0	0	0	0	NaN	NA	NA	NA	NA	NA	NA	NA	NA	NA	NA	NA	NA	NA	NA	NA	NA	NA	NA	NA	NA	NA	NA	NA	NA
930	DE-0198382	NA	NA	NA	71	72	m	l	p	NaN	l	0	gb	0	0	0	0	0	0	0	0	0	0	0	NaN	NA	NA	NA	NA	NA	NA	NA	NA	NA	NA	NA	NA	NA	NA	NA	NA	NA	NA	NA	NA	NA	NA	NA	NA
931	DE-0198393	NA	NA	NA	52	52	f	l	t	NaN	r	0	gb	0	0	0	0	0	0	0	0	0	0	0	NaN	NA	NA	NA	NA	NA	NA	NA	NA	NA	NA	NA	NA	NA	NA	NA	NA	NA	NA	NA	NA	NA	NA	NA	NA
932	DE-0198413	NA	NA	NA	46	54	f	ml	to	NaN	r	0	gb	0	0	0	1	0	0	0	0	0	0	0	NaN	NA	NA	NA	NA	NA	NA	NA	NA	NA	NA	NA	NA	NA	NA	NA	NA	NA	NA	NA	NA	NA	NA	NA	NA
933	DE-0198415	NA	NA	NA	64	65	f	B	B	NaN	NA	0	gb	0	0	0	0	0	0	0	0	0	0	0	NaN	NA	NA	NA	NA	NA	NA	NA	NA	NA	NA	NA	NA	NA	NA	NA	NA	NA	NA	NA	NA	NA	NA	NA	NA
934	DE-0198427	NA	NA	NA	64	65	m	l	p	NaN	r	0	gb	0	0	0	0	0	0	0	0	0	0	0	NaN	NA	NA	NA	NA	NA	NA	NA	NA	NA	NA	NA	NA	NA	NA	NA	NA	NA	NA	NA	NA	NA	NA	NA	NA
935	DE-0198428	NA	NA	NA	64	64	f	l	f	NaN	r	0	gb	0	0	0	0	0	0	0	0	0	0	0	NaN	NA	NA	NA	NA	NA	NA	NA	NA	NA	NA	NA	NA	NA	NA	NA	NA	NA	NA	NA	NA	NA	NA	NA	NA
936	DE-0198431	NA	NA	NA	69	70	m	l	p	NaN	l	0	gb	0	1	0	0	0	0	0	0	0	0	0	NaN	NA	NA	NA	1	NA	NA	NA	NA	NA	NA	NA	NA	NA	NA	NA	NA	NA	NA	NA	NA	NA	NA	NA	NA
937	DE-0198437	NA	NA	NA	54	55	f	l	p	NaN	r	1	gb	0	0	0	0	0	0	0	0	0	0	0	sarcomatous features	NA	NA	NA	NA	NA	NA	NA	NA	NA	NA	NA	NA	NA	NA	NA	NA	NA	NA	NA	NA	NA	NA	NA	NA
938	DE-0198438	NA	NA	NA	69	70	m	ml	tp	NaN	r	0	gb	0	0	0	0	0	0	0	0	0	0	0	NaN	NA	NA	NA	NA	NA	NA	NA	NA	NA	NA	NA	NA	NA	NA	NA	NA	NA	NA	NA	NA	NA	NA	NA	NA
939	DE-0198445	NA	NA	NA	31	32	f	ml	po	NaN	l	0	gb	0	0	0	0	0	0	0	0	0	0	0	NaN	NA	NA	NA	NA	NA	NA	NA	NA	NA	NA	NA	NA	NA	NA	NA	NA	NA	NA	NA	NA	NA	NA	NA	NA
940	DE-0198470	NA	NA	NA	53	53	m	l	f	NaN	l	0	gb	1	0	0	0	0	0	0	0	0	0	0	NaN	8	0	0	NA	NA	NA	NA	NA	0	0	0	0	0	0	0	0	0	0	0	0	0	0	0	0
941	DE-0198519	NA	NA	NA	55	55	f	l	t	NaN	l	0	gb	0	0	0	0	0	0	0	0	0	0	0	NaN	NA	NA	NA	NA	NA	NA	NA	NA	NA	NA	NA	NA	NA	NA	NA	NA	NA	NA	NA	NA	NA	NA	NA	NA
942	DE-0198568	NA	NA	NA	56	56	m	l	f	NaN	l	0	gb	0	0	0	0	0	0	0	0	0	0	0	NaN	9	0	0	NA	NA	NA	NA	NA	0	0	0	0	0	0	0	0	0	0	0	0	0	0	0	0
943	DE-0198758	NA	NA	NA	76	77	f	l	p	NaN	l	0	gb	0	0	0	0	0	0	0	0	0	0	0	NaN	6	0	0	NA	NA	NA	NA	NA	0	0	0	0	0	0	0	0	0	0	0	0	0	0	0	0
944	DE-0198759	NA	NA	NA	58	58	f	l	p	NaN	r	0	gb	0	0	0	0	0	0	0	0	0	0	0	NaN	7	0	0	NA	NA	NA	NA	NA	0	0	0	0	0	0	0	0	0	0	0	0	0	0	0	0
945	DE-0198799	NA	NA	NA	63	64	f	l	p	NaN	r	0	gb	0	0	0	0	0	0	0	0	0	0	0	NaN	NA	NA	NA	NA	NA	NA	NA	NA	NA	NA	NA	NA	NA	NA	NA	NA	NA	NA	NA	NA	NA	NA	NA	NA
946	DE-0198897	NA	NA	NA	57	57	m	l	t	NaN	l	0	gb	0	0	0	0	0	0	0	0	0	0	0	NaN	4	0	0	NA	NA	NA	NA	NA	0	0	0	0	0	0	0	0	0	0	0	0	0	0	0	0
947	DE-0198909	NA	NA	NA	70	70	f	ml	tp	NaN	r	0	gb	0	0	0	0	0	0	0	0	0	0	0	NaN	6	0	0	NA	NA	NA	NA	NA	0	0	0	0	0	0	0	0	0	0	0	0	0	0	0	0
948	DE-0198939	NA	NA	NA	59	59	f	l	t	NaN	l	0	gb	0	0	1	0	0	0	0	0	0	0	0	NaN	6	0	0	NA	NA	NA	NA	NA	0	0	0	0	0	0	0	0	0	0	0	0	0	0	0	0
949	DE-0198976	NA	NA	NA	73	73	m	ml	tp	NaN	r	0	gb	0	0	0	0	0	0	0	0	0	0	0	NaN	NA	NA	NA	NA	NA	NA	NA	NA	NA	NA	NA	NA	NA	NA	NA	NA	NA	NA	NA	NA	NA	NA	NA	NA
950	DE-0198977	NA	NA	NA	58	58	f	l	f	NaN	NA	0	gb	0	0	1	0	0	0	0	0	0	0	0	NaN	7	0	0	NA	NA	NA	NA	NA	0	0	0	0	0	0	0	0	0	0	0	0	0	0	0	0
951	DE-0199037	NA	NA	NA	61	61	m	l	t	NaN	l	1	gb	1	0	0	0	0	0	0	0	0	0	0	NaN	7	0	0	NA	NA	NA	NA	NA	0	0	0	0	0	0	0	0	0	0	0	0	0	0	0	0
952	DE-0199136	NA	NA	NA	62	63	f	B	B	NaN	NA	0	gb	0	0	1	0	0	0	0	0	0	0	0	NaN	11	0	0	NA	NA	NA	NA	NA	0	0	0	0	0	0	0	0	0	0	0	0	0	0	0	0
953	DE-0199794	NA	NA	NA	78	78	m	B	B	NaN	NA	0	gb	0	0	0	0	0	0	0	0	0	0	0	NaN	9	0	0	NA	NA	NA	NA	NA	0	0	0	0	0	0	0	0	0	0	0	0	0	0	0	0
954	DE-0200073	NA	NA	NA	33	33	m	l	p	NaN	r	0	gb	0	0	0	0	0	0	0	0	0	0	0	NaN	11	0	0	NA	NA	NA	NA	NA	0	0	0	0	0	0	0	0	0	0	0	0	0	0	0	0
955	DE-0200086	NA	NA	NA	55	56	m	l	p	NaN	l	0	gb	0	0	0	0	0	0	0	0	0	0	0	NaN	8	0	0	NA	NA	NA	NA	NA	0	0	0	0	0	0	0	0	0	0	0	0	0	0	0	0
956	DE-0200104	NA	NA	NA	43	43	f	l	f	NaN	r	0	gb	0	0	0	0	0	0	1	0	0	0	0	NaN	6	0	0	NA	NA	NA	NA	NA	0	0	0	0	0	0	0	0	0	0	0	0	0	0	0	0
957	DE-0200134	NA	NA	NA	66	68	f	l	t	NaN	r	0	gb	0	0	0	0	0	0	0	0	0	0	0	NaN	6	0	0	NA	NA	NA	NA	NA	0	0	0	0	0	0	0	0	0	0	0	0	0	0	0	0
958	DE-0200305	NA	NA	NA	53	54	m	l	p	NaN	l	1	gb	0	0	1	0	0	0	0	0	0	0	0	NaN	8	0	0	NA	NA	NA	NA	NA	0	0	0	0	0	0	0	0	0	0	0	0	0	0	0	0
959	DE-0200399	NA	NA	NA	57	57	f	l	f	NaN	l	1	gb	0	0	0	0	0	0	0	0	0	0	0	NaN	6	0	0	NA	NA	NA	NA	NA	0	0	0	0	0	0	0	0	0	0	0	0	0	0	0	0
960	DE-0200644	NA	NA	NA	75	75	m	ml	ft	NaN	r	0	gb	0	0	0	0	0	0	0	0	0	0	0	NaN	4	0	0	NA	NA	NA	NA	NA	0	0	0	0	0	0	0	0	0	0	0	0	0	0	0	0
961	DE-0200646	NA	NA	NA	59	59	m	NNS	PL	NaN	r	0	gb	0	0	0	0	0	0	0	0	0	0	0	NaN	6	0	0	NA	NA	NA	NA	NA	0	0	0	0	0	0	0	0	0	0	0	0	0	0	0	0
962	DE-0200755	NA	NA	NA	78	78	f	l	p	NaN	r	0	gb	0	0	1	0	0	0	0	0	0	0	0	NaN	NA	NA	NA	NA	NA	NA	NA	NA	NA	NA	NA	NA	NA	NA	NA	NA	NA	NA	NA	NA	NA	NA	NA	NA
963	DE-0200785	NA	NA	NA	72	72	m	l	t	NaN	r	0	gb	0	0	1	0	0	0	0	0	0	0	0	NaN	7	0	0	NA	NA	NA	NA	NA	0	0	0	0	0	0	0	0	0	0	0	0	0	0	0	0
964	DE-0201208	NA	NA	NA	60	61	m	l	t	NaN	r	0	gb	0	0	0	0	0	0	0	0	0	0	0	NaN	7	0	0	NA	NA	NA	NA	NA	0	0	0	0	0	0	0	0	0	0	0	0	0	0	0	0
965	DE-0201215	NA	NA	NA	50	51	m	l	p	NaN	l	0	gb	0	0	0	0	0	0	0	0	0	0	0	NaN	7	0	0	NA	NA	NA	NA	NA	0	0	0	0	0	0	0	0	0	0	0	0	0	0	0	0
966	DE-0201216	NA	NA	NA	49	50	m	l	t	NaN	l	0	gb	0	0	0	0	0	0	0	0	0	0	0	NaN	NA	NA	NA	NA	NA	NA	NA	NA	NA	NA	NA	NA	NA	NA	NA	NA	NA	NA	NA	NA	NA	NA	NA	NA
967	DE-0201256	NA	NA	NA	37	37	f	l	t	NaN	l	0	gb	0	0	0	0	0	0	0	0	0	0	0	NaN	6	0	0	NA	NA	NA	NA	NA	0	0	0	0	0	0	0	0	0	0	0	0	0	0	0	0
968	DE-0201258	NA	NA	NA	46	46	m	l	f	NaN	l	0	gb	0	0	0	0	0	0	0	0	0	0	0	NaN	6	0	0	NA	NA	NA	NA	NA	0	0	0	0	0	0	0	0	0	0	0	0	0	0	0	0
969	DE-0201409	NA	NA	NA	52	52	f	l	f	NaN	l	0	gb	0	0	0	0	0	0	0	0	0	0	0	NaN	6	0	0	NA	NA	NA	NA	NA	0	0	0	0	0	0	0	0	0	0	0	0	0	0	0	0
970	DE-0201449	NA	NA	NA	75	75	m	l	t	NaN	l	0	gb	0	0	0	0	0	0	0	0	0	0	0	NaN	8	0	0	NA	NA	NA	NA	NA	0	0	0	0	0	0	0	0	0	0	0	0	0	0	0	0
971	DE-0201500	NA	NA	NA	80	80	m	ST	TH	NaN	r	0	gb	0	0	1	0	0	0	0	0	0	0	0	NaN	9	0	0	NA	NA	NA	NA	NA	0	0	0	0	0	0	0	0	0	0	0	0	0	0	0	0
972	DE-0201520	NA	NA	NA	67	67	m	B	B	NaN	r	0	gb	0	0	0	0	0	0	0	0	0	0	0	NaN	5	0	0	NA	NA	NA	NA	NA	0	0	0	0	0	0	0	0	0	0	0	0	0	0	0	0
973	DE-0201584	NA	NA	NA	70	71	f	IT	CB	NaN	l	0	gb	0	0	0	0	0	0	0	0	0	0	0	NaN	NA	NA	NA	NA	NA	NA	NA	NA	NA	NA	NA	NA	NA	NA	NA	NA	NA	NA	NA	NA	NA	NA	NA	NA
974	DE-0201592	NA	NA	NA	57	58	m	l	f	NaN	r	0	gb	0	0	0	0	0	0	0	0	0	0	0	NaN	9	0	0	NA	NA	NA	NA	NA	0	0	0	0	0	0	0	0	0	0	0	0	0	0	0	0
975	DE-0201636	NA	NA	NA	68	68	m	l	t	NaN	NA	0	gb	0	0	1	0	0	0	0	0	0	0	0	NaN	8	0	0	NA	NA	NA	NA	NA	0	0	0	0	0	0	0	0	0	0	0	0	0	0	0	0
976	DE-0201638	NA	NA	NA	51	51	m	l	f	NaN	r	0	gb	0	0	0	0	0	0	0	0	0	0	0	NaN	4	0	0	NA	NA	NA	NA	NA	0	0	0	0	0	0	0	0	0	0	0	0	0	0	0	0
977	DE-0201646	NA	NA	NA	66	66	m	l	t	NaN	l	0	gb	0	0	0	0	0	0	0	0	0	0	0	NaN	7	0	0	NA	NA	NA	NA	NA	0	0	0	0	0	0	0	0	0	0	0	0	0	0	0	0
978	DE-0201841	NA	NA	NA	61	61	m	l	t	NaN	l	0	gb	0	0	0	0	0	0	0	0	0	0	0	NaN	8	0	0	NA	NA	NA	NA	NA	0	0	0	0	0	0	0	0	0	0	0	0	0	0	0	0
979	DE-0201980	NA	NA	NA	69	69	f	l	t	NaN	l	0	gb	0	0	0	0	0	0	0	0	0	0	0	NaN	7	0	0	NA	NA	NA	NA	NA	0	0	0	0	0	0	0	0	0	0	0	0	0	0	0	0
980	DE-0202076	NA	NA	NA	17	17	f	l	f	NaN	r	0	gb	0	0	0	0	0	0	0	0	0	0	0	NaN	8	0	0	NA	NA	NA	NA	NA	0	0	0	0	0	0	0	0	0	0	0	0	0	0	0	0
981	DE-0202079	NA	NA	NA	80	80	m	l	t	NaN	l	0	gb	0	0	1	0	0	0	0	0	0	0	0	NaN	6	0	0	NA	NA	NA	NA	NA	0	0	0	0	0	0	0	0	0	0	0	0	0	0	0	0
982	DE-0202116	NA	NA	NA	39	40	m	l	f	NaN	l	0	gb	0	0	0	0	0	0	0	0	0	0	0	NaN	10	0	0	NA	NA	NA	NA	NA	0	0	0	0	0	0	0	0	0	0	0	0	0	0	0	0
983	DE-0202228	NA	NA	NA	50	50	m	l	t	NaN	r	0	gb	1	0	0	0	0	0	0	0	0	0	0	NaN	6	0	0	NA	NA	NA	NA	NA	0	0	0	0	0	0	0	0	0	0	0	0	0	0	0	0
984	DE-0202840	NA	NA	NA	77	77	f	l	p	NaN	l	0	gb	0	0	1	0	0	0	0	0	0	0	0	NaN	4	0	0	NA	NA	NA	NA	NA	0	0	0	0	0	0	0	0	0	0	0	0	0	0	0	0
985	DE-0202873	NA	NA	NA	60	60	m	l	t	NaN	r	0	gb	0	0	1	0	0	0	0	0	0	0	0	NaN	NA	NA	NA	NA	NA	NA	NA	NA	NA	NA	NA	NA	NA	NA	NA	NA	NA	NA	NA	NA	NA	NA	NA	NA
986	DE-0202913	NA	NA	NA	60	60	m	l	t	NaN	l	0	gb	0	0	0	0	0	0	0	0	0	0	0	NaN	9	0	0	NA	NA	NA	NA	NA	0	0	0	0	0	0	0	0	0	0	0	0	0	0	0	0
987	DE-0203012	NA	NA	NA	58	58	m	B	B	NaN	NA	0	gb	0	0	1	0	0	0	0	0	0	0	0	NaN	7	0	0	NA	NA	NA	NA	NA	0	0	0	0	0	0	0	0	0	0	0	0	0	0	0	0
988	DE-0203303	NA	NA	NA	54	55	f	l	f	NaN	l	0	gb	0	0	0	0	0	0	0	0	0	0	0	NaN	5	0	0	NA	NA	NA	NA	NA	0	0	0	0	0	0	0	0	0	0	0	0	0	0	0	0
989	DE-0203320	NA	NA	NA	80	80	f	l	t	NaN	r	0	gb	0	0	0	0	0	0	0	0	0	0	0	NaN	4	0	0	NA	NA	NA	NA	NA	0	0	0	0	0	0	0	0	0	0	0	0	0	0	0	0
990	DE-0203384	NA	NA	NA	33	33	m	l	p	NaN	r	0	gb	0	0	0	0	0	0	0	0	0	0	0	NaN	NA	NA	NA	NA	NA	NA	NA	NA	NA	NA	NA	NA	NA	NA	NA	NA	NA	NA	NA	NA	NA	NA	NA	NA
991	DE-0203396	NA	NA	NA	63	64	m	B	B	NaN	NA	0	gb	0	0	1	0	0	0	0	0	0	0	0	NaN	6	0	0	NA	NA	NA	NA	NA	0	0	0	0	0	0	0	0	0	0	0	0	0	0	0	0
992	DE-0203399	NA	NA	NA	63	63	m	l	p	NaN	l	0	gb	0	0	0	0	0	0	0	0	0	0	0	NaN	6	0	0	NA	NA	NA	NA	NA	0	0	0	0	0	0	0	0	0	0	0	0	0	0	0	0
993	DE-0203487	NA	NA	NA	75	75	f	l	f	NaN	r	0	gb	0	0	0	0	0	0	0	0	0	0	0	NaN	11	0	0	NA	NA	NA	NA	NA	0	0	0	0	0	0	0	0	0	0	0	0	0	0	0	0
994	DE-0203626	NA	NA	NA	47	47	m	l	f	NaN	r	0	gb	0	0	0	0	0	0	0	0	0	0	0	NaN	12	0	0	NA	NA	NA	NA	NA	0	0	0	0	0	0	0	0	0	0	0	0	0	0	0	0
995	DE-0203738	NA	NA	NA	41	41	m	l	f	NaN	r	0	gb	0	0	1	0	0	0	0	0	0	0	0	NaN	4	0	0	NA	NA	NA	NA	NA	0	0	0	0	0	0	0	0	0	0	0	0	0	0	0	0
996	DE-0203764	NA	NA	NA	47	47	f	l	t	NaN	r	0	gb	0	0	0	0	0	0	0	0	0	0	0	NaN	4	0	0	NA	NA	NA	NA	NA	0	0	0	0	0	0	0	0	0	0	0	0	0	0	0	0
997	DE-0203850	NA	NA	NA	63	63	m	l	t	NaN	NA	0	gb	0	0	0	0	0	0	0	0	0	0	0	NaN	5	0	0	NA	NA	NA	NA	NA	0	0	0	0	0	0	0	0	0	0	0	0	0	0	0	0
998	DE-0204142	NA	NA	NA	65	65	m	B	B	NaN	NA	0	gb	0	0	1	0	0	0	0	0	0	0	0	NaN	NA	NA	NA	NA	NA	NA	NA	NA	NA	NA	NA	NA	NA	NA	NA	NA	NA	NA	NA	NA	NA	NA	NA	NA
999	DE-0204287	NA	NA	NA	67	67	f	l	t	NaN	l	0	gb	1	0	1	0	0	0	0	0	0	0	0	NaN	4	0	0	NA	NA	NA	NA	NA	0	0	0	0	0	0	0	0	0	0	0	0	0	0	0	0
1000	DE-0204434	NA	NA	NA	36	36	m	l	f	NaN	l	0	gb	0	0	0	0	0	0	0	0	0	0	0	NaN	5	0	0	NA	NA	NA	NA	NA	0	0	0	0	0	0	0	0	0	0	0	0	0	0	0	0
1001	DE-0204443	NA	NA	NA	54	54	m	l	t	NaN	l	0	gb	0	0	0	0	0	0	0	0	0	0	0	NaN	4	0	0	NA	NA	NA	NA	NA	0	0	0	0	0	0	0	0	0	0	0	0	0	0	0	0
1002	DE-0204829	NA	NA	NA	70	70	f	B	B	NaN	NA	0	gb	0	0	0	0	0	0	0	0	0	0	0	NaN	4	0	0	NA	NA	NA	NA	NA	0	0	0	0	0	0	0	0	0	1	0	0	0	0	0	0
1003	DE-0205190	NA	NA	NA	53	53	m	B	B	NaN	NA	0	gb	1	0	0	0	0	0	0	0	0	0	0	NaN	9	0	0	NA	NA	NA	NA	NA	0	0	0	0	0	0	0	0	0	0	0	0	0	0	0	0
1004	DE-0205203	NA	NA	NA	35	37	m	l	p	NaN	l	0	gb	0	0	0	0	0	0	0	0	0	0	0	cystic	6	0	0	NA	NA	NA	NA	NA	0	0	0	0	0	0	0	0	0	0	0	0	0	0	0	0
1005	DE-0205205	NA	NA	NA	38	38	m	l	f	NaN	NA	0	gb	0	0	0	0	0	0	0	0	0	0	0	NaN	6	0	0	NA	NA	NA	NA	NA	0	0	0	0	0	0	0	0	0	0	0	0	0	0	0	0
1006	DE-0205231	NA	NA	NA	63	63	m	l	p	NaN	l	0	gb	0	0	0	0	0	0	0	0	0	0	0	NaN	NA	NA	NA	NA	NA	NA	NA	NA	NA	NA	NA	NA	NA	NA	NA	NA	NA	NA	NA	NA	NA	NA	NA	NA
1007	DE-0205271	NA	NA	NA	81	81	m	l	t	NaN	l	0	gb	0	0	0	0	0	0	0	0	0	0	0	NaN	5	0	0	NA	NA	NA	NA	NA	0	0	0	0	0	0	0	0	0	0	0	0	0	0	0	0
1008	DE-0205316	NA	NA	NA	55	55	m	l	t	NaN	l	0	gb	0	0	0	0	0	0	0	0	0	0	0	NaN	NA	NA	NA	NA	NA	NA	NA	NA	NA	NA	NA	NA	NA	NA	NA	NA	NA	NA	NA	NA	NA	NA	NA	NA
1009	DE-0205443	NA	NA	NA	68	68	m	l	t	NaN	l	0	gb	0	0	0	0	0	0	0	0	0	0	0	NaN	6	0	0	NA	NA	NA	NA	NA	0	0	0	0	0	0	0	0	0	0	0	0	0	0	0	0
1010	DE-0205649	NA	NA	NA	37	39	m	l	p	NaN	l	0	gb	0	0	0	0	0	0	0	0	0	0	0	NaN	6	0	0	NA	NA	NA	NA	NA	0	0	0	0	0	0	0	0	0	0	0	0	0	0	0	0
1011	DE-0205657	NA	NA	NA	45	45	m	l	f	NaN	r	0	gb	0	0	0	0	0	0	0	0	0	0	0	NaN	5	0	0	NA	NA	NA	NA	NA	0	0	0	0	0	0	0	0	0	0	0	0	0	0	0	0
1012	DE-0205806	NA	NA	NA	59	60	m	B	B	NaN	NA	0	gb	0	0	0	0	0	0	0	0	0	0	0	NaN	7	0	0	NA	NA	NA	NA	NA	0	0	0	0	0	0	0	0	0	0	0	1	0	0	0	0
1013	DE-0205813	NA	NA	NA	65	65	f	l	t	NaN	l	0	gb	0	0	0	0	0	0	0	0	0	0	0	NaN	6	0	0	NA	NA	NA	NA	NA	0	0	0	0	0	0	0	0	0	0	0	0	0	0	0	0
1014	DE-0205830	NA	NA	NA	36	36	m	B	B	NaN	NA	0	gb	0	0	0	0	0	0	0	0	0	0	0	NaN	5	0	0	NA	NA	NA	NA	NA	0	0	0	0	0	0	0	0	0	0	0	0	0	0	0	0
1015	DE-0205851	NA	NA	NA	66	66	f	l	f	NaN	l	0	gb	0	0	0	0	0	0	0	0	0	0	0	NaN	6	0	0	NA	NA	NA	NA	NA	0	0	0	0	0	0	0	0	0	0	0	0	0	0	0	0
1016	DE-0206081	NA	NA	NA	46	46	m	B	B	NaN	NA	0	gb	1	0	0	0	0	0	0	0	0	1	0	NaN	4	0	0	NA	NA	NA	NA	NA	0	0	0	0	0	0	0	0	0	0	0	0	0	0	0	0
1017	DE-0206083	NA	NA	NA	71	71	m	l	o	NaN	l	0	gb	0	0	0	0	0	0	0	0	0	0	0	NaN	9	0	0	NA	NA	NA	NA	NA	0	0	0	0	0	0	0	0	0	0	0	0	0	0	0	0
1018	DE-0206297	NA	NA	NA	52	52	f	l	t	NaN	r	0	gb	0	0	0	0	0	0	0	0	0	0	0	NaN	7	0	0	NA	NA	NA	NA	NA	0	0	0	0	0	0	0	0	0	0	0	0	0	0	0	0
1019	DE-0206353	NA	NA	NA	56	56	m	l	f	NaN	r	0	gb	0	0	0	0	0	0	0	0	0	0	0	NaN	6	0	0	NA	NA	NA	NA	NA	0	0	0	0	0	0	0	0	0	0	0	0	0	0	0	0
1020	DE-0206422	NA	NA	NA	57	57	m	l	o	NaN	r	0	gb	1	0	0	0	0	0	0	0	0	0	0	NaN	4	0	0	NA	NA	NA	NA	NA	0	0	0	0	0	0	0	0	0	0	0	0	0	0	0	0
1021	DE-0206518	NA	NA	NA	57	57	f	l	f	NaN	l	0	gb	0	0	0	0	0	0	0	0	0	0	0	NaN	7	0	0	NA	NA	NA	NA	NA	0	0	0	0	0	0	0	0	0	0	0	0	0	0	0	0
1022	DE-0206662	NA	NA	NA	61	61	m	B	B	NaN	l	0	gb	0	0	1	0	0	0	0	0	0	0	0	NaN	5	0	0	NA	NA	NA	NA	NA	0	0	0	0	0	0	0	0	0	0	0	0	0	0	0	0
1023	DE-0206789	NA	NA	NA	62	62	m	B	B	NaN	NA	0	gb	0	0	0	0	0	0	0	0	0	0	0	NaN	9	0	0	NA	NA	NA	NA	NA	0	0	0	0	0	0	0	0	0	0	0	0	0	0	0	0
1024	DE-0206808	NA	NA	NA	68	68	m	l	f	NaN	r	0	gb	0	0	0	0	0	0	0	0	0	0	0	NaN	4	0	0	NA	NA	NA	NA	NA	0	0	0	0	0	0	0	0	0	0	0	0	0	0	0	0
1025	DE-0206821	NA	NA	NA	27	27	m	l	p	NaN	l	0	gb	1	0	0	0	0	0	0	0	0	0	0	NaN	11	0	0	NA	NA	NA	NA	NA	0	0	0	0	0	0	0	0	0	0	0	0	0	0	0	0
1026	DE-0206870	NA	NA	NA	21	21	f	B	B	NaN	r	0	gb	0	0	1	0	0	0	0	0	0	0	0	NaN	7	0	0	NA	NA	NA	NA	NA	0	0	0	0	0	0	0	0	0	0	0	0	0	0	0	0
1027	DE-0206911	NA	NA	NA	71	71	m	ml	to	NaN	r	0	gb	0	0	0	0	0	0	0	0	0	0	0	NaN	4	0	0	NA	NA	NA	NA	NA	0	0	0	0	0	0	0	0	0	0	0	0	0	0	0	0
1028	DE-0207014	NA	NA	NA	47	48	m	ml	tp	NaN	NA	0	gb	0	0	1	0	0	0	0	0	0	0	0	NaN	8	0	0	NA	NA	NA	NA	NA	0	0	0	0	0	0	0	0	0	0	0	0	0	0	0	0
1029	DE-0207028	NA	NA	NA	73	73	m	l	t	NaN	r	0	gb	0	0	0	0	0	0	0	0	0	0	0	NaN	9	0	0	NA	NA	NA	NA	NA	0	0	0	0	0	0	0	0	0	0	0	0	0	0	0	0
1030	DE-0207042	NA	NA	NA	67	70	m	B	B	NaN	NA	0	gb	0	0	0	0	0	0	0	0	0	0	0	NaN	4	0	0	NA	NA	NA	NA	NA	0	0	0	0	0	0	0	0	0	0	0	0	0	0	0	0
1031	DE-0207193	NA	NA	NA	53	54	f	l	f	NaN	r	0	gb	0	0	1	0	0	0	0	0	0	0	0	NaN	8	0	0	NA	NA	NA	NA	NA	0	0	0	0	0	0	0	0	0	0	0	0	0	0	0	0
1032	DE-0207293	NA	NA	NA	83	83	f	l	p	NaN	r	0	gb	0	0	0	0	0	0	0	0	0	0	0	NaN	9	0	0	NA	NA	NA	NA	NA	0	0	0	0	0	0	0	0	0	0	0	0	0	0	0	0
1033	DE-0207315	NA	NA	NA	61	61	m	l	p	NaN	l	0	gb	0	0	0	0	0	0	0	0	0	0	0	NaN	4	0	0	NA	NA	NA	NA	NA	0	0	0	0	0	0	0	0	0	0	0	0	0	0	0	0
1034	DE-0207530	NA	NA	NA	59	59	m	l	f	NaN	r	0	gb	0	0	0	0	0	0	0	0	0	0	0	NaN	8	0	0	NA	NA	NA	NA	NA	0	0	0	0	0	0	0	0	0	0	0	1	0	0	0	0
1035	DE-0207702	NA	NA	NA	58	58	m	B	B	NaN	NA	0	gb	0	1	0	0	0	0	0	0	0	0	0	NaN	9	0	0	NA	NA	NA	NA	NA	0	0	0	0	0	0	0	0	0	0	0	0	0	0	0	0
1036	DE-0207705	NA	NA	NA	59	59	m	l	f	NaN	l	0	gb	0	0	0	0	0	0	0	0	0	0	0	NaN	8	0	0	NA	NA	NA	NA	NA	0	0	0	0	0	0	0	0	0	0	0	0	0	0	0	0
1037	DE-0207714	NA	NA	NA	63	63	f	l	f	NaN	r	0	gb	0	0	0	0	0	0	0	0	0	0	0	NaN	7	0	0	NA	NA	NA	NA	NA	0	0	0	0	0	0	0	0	0	0	0	0	0	0	0	0
1038	DE-0207723	NA	NA	NA	70	70	m	l	f	NaN	r	0	gb	0	0	0	0	0	0	0	0	0	0	0	NaN	3	0	0	NA	NA	NA	NA	NA	0	0	0	0	0	0	0	0	0	0	0	0	0	0	0	0
1039	DE-0207730	NA	NA	NA	42	43	m	ml	fp	NaN	r	0	gb	0	0	0	0	0	0	0	0	0	0	0	NaN	9	0	0	NA	NA	NA	NA	NA	0	0	0	0	0	0	0	0	0	0	0	0	0	0	0	0
1040	DE-0207961	NA	NA	NA	52	53	m	l	t	NaN	l	0	gb	0	0	0	0	0	0	0	0	0	0	0	NaN	9	0	0	NA	NA	NA	NA	NA	0	0	0	0	0	0	0	0	0	0	0	0	0	0	0	0
1041	DE-0208101	NA	NA	NA	70	70	f	l	f	NaN	r	0	gb	0	0	1	0	0	0	0	0	0	0	0	NaN	7	0	0	NA	NA	NA	NA	NA	0	0	0	0	0	0	0	0	0	0	0	0	0	0	0	0
1042	DE-0208167	NA	NA	NA	69	69	m	l	t	NaN	l	0	gb	0	0	0	0	0	0	0	0	0	0	0	NaN	NA	NA	NA	NA	NA	NA	NA	NA	NA	NA	NA	NA	NA	NA	NA	NA	NA	NA	NA	NA	NA	NA	NA	NA
1043	DE-0208175	NA	NA	NA	57	57	m	l	p	NaN	r	0	gb	1	0	0	0	0	0	0	0	0	0	0	NaN	NA	NA	NA	NA	NA	NA	NA	NA	NA	NA	NA	NA	NA	NA	NA	NA	NA	NA	NA	NA	NA	NA	NA	NA
1044	DE-0208190	NA	NA	NA	46	47	m	l	f	NaN	l	0	gb	1	0	0	0	0	0	0	0	0	0	0	NaN	6	0	0	NA	NA	NA	NA	NA	0	0	0	0	0	0	0	0	0	0	0	0	0	0	0	0
1045	DE-0208290	NA	NA	NA	49	49	m	l	o	NaN	r	0	gb	0	0	0	0	0	0	0	0	0	0	0	NaN	4	0	0	NA	NA	NA	NA	NA	0	0	0	0	0	0	0	0	0	0	0	0	0	0	0	0
1046	DE-0208305	NA	NA	NA	53	55	m	l	p	NaN	r	0	gb	0	0	1	0	0	0	0	0	0	0	0	NaN	NaN	NaN	NA	NA	NA	NA	NA	NA	NA	NA	NA	NA	NA	NA	NA	NA	NA	NA	NA	NA	NA	NA	NA	NA
1047	DE-0208322	NA	NA	NA	61	61	m	l	t	NaN	NA	0	gb	0	0	0	0	0	0	0	0	0	0	0	NaN	6	0	0	NA	NA	NA	NA	NA	0	0	0	0	0	0	0	0	0	0	0	0	0	0	0	0
1048	DE-0208377	NA	NA	NA	55	55	m	l	f	NaN	l	0	gb	0	0	0	0	0	0	0	0	0	0	0	NaN	6	0	0	NA	NA	NA	NA	NA	0	0	0	0	0	0	0	0	0	0	0	0	0	0	0	0
1049	DE-0208538	NA	NA	NA	36	36	f	l	f	NaN	r	0	gb	0	0	1	0	0	0	0	0	0	0	0	NaN	8	0	0	NA	NA	NA	NA	NA	0	0	0	0	0	0	0	0	0	0	0	1	0	0	0	0
1050	DE-0208548	NA	NA	NA	51	51	f	l	p	NaN	r	0	gb	0	0	1	0	0	0	0	0	0	0	0	NaN	6	0	0	NA	NA	NA	NA	NA	0	0	0	0	0	0	0	0	0	0	0	0	0	0	0	0
1051	DE-0208595	NA	NA	NA	41	43	m	ST	BG	NaN	l	0	gb	0	0	1	0	0	0	0	0	0	0	0	NaN	3	0	0	NA	NA	NA	NA	NA	0	0	0	0	0	0	0	0	0	0	0	0	0	0	0	0
1052	DE-0208658	NA	NA	NA	44	44	f	B	B	NaN	r	0	gb	0	0	0	0	0	0	0	0	0	0	0	NaN	NA	NA	NA	NA	NA	NA	NA	NA	NA	NA	NA	NA	NA	NA	NA	NA	NA	NA	NA	NA	NA	NA	NA	NA
1053	DE-0208662	NA	NA	NA	55	55	m	l	f	NaN	r	0	gb	0	0	0	0	0	0	0	0	0	0	0	NaN	6	0	0	NA	NA	NA	NA	NA	0	0	0	0	0	0	0	0	0	0	0	0	0	0	0	0
1054	DE-0208802	NA	NA	NA	45	45	m	ST	BG	NaN	l	0	gb	0	0	0	0	0	0	0	0	0	0	0	NaN	6	0	0	NA	NA	NA	NA	NA	0	0	0	0	0	0	0	0	0	0	0	0	0	0	0	0
1055	DE-0209053	NA	NA	NA	70	70	m	l	f	NaN	l	0	gb	0	0	0	0	0	0	0	0	0	0	0	NaN	6	0	0	NA	NA	NA	NA	NA	0	0	0	0	0	0	0	0	0	0	0	0	0	0	0	0
1056	DE-0209105	NA	NA	NA	49	49	f	B	B	NaN	NA	0	gb	1	0	0	0	0	0	0	0	0	0	0	NaN	6	0	0	NA	NA	NA	NA	NA	0	0	0	0	0	0	0	0	0	0	0	0	0	0	0	0
1057	DE-0209285	NA	NA	NA	45	46	m	l	f	NaN	NA	0	gb	0	0	0	0	0	0	0	0	0	0	0	NaN	NA	NA	NA	NA	NA	NA	NA	NA	NA	NA	NA	NA	NA	NA	NA	NA	NA	NA	NA	NA	NA	NA	NA	NA
1058	DE-0209345	NA	NA	NA	70	70	m	l	f	NaN	r	0	gb	0	0	1	0	0	0	0	0	0	0	0	NaN	6	0	0	NA	NA	NA	NA	NA	0	0	0	0	0	0	0	0	0	0	0	0	0	0	0	0
1059	DE-0209461	NA	NA	NA	78	78	m	B	B	NaN	NA	0	gb	0	0	1	0	0	0	0	0	0	0	0	NaN	6	0	0	NA	NA	NA	NA	NA	0	0	0	0	0	0	0	0	0	0	0	0	0	0	0	0
1060	DE-0209535	NA	NA	NA	44	44	m	l	f	NaN	l	0	gb	0	0	0	0	0	0	0	0	0	0	0	NaN	6	0	0	NA	NA	NA	NA	NA	0	0	0	0	0	0	0	0	0	0	0	0	0	0	0	0
1061	DE-0209552	NA	NA	NA	46	49	m	B	B	NaN	r	0	gb	0	0	1	0	0	0	0	0	0	0	0	NaN	4	0	0	NA	NA	NA	NA	NA	0	0	0	0	0	0	0	0	0	0	0	0	0	0	0	0
1062	DE-0209568	NA	NA	NA	58	58	m	l	p	NaN	l	0	gb	0	0	1	0	0	0	0	0	0	0	0	NaN	4	0	0	NA	NA	NA	NA	NA	0	0	0	0	0	0	0	0	0	0	0	0	0	0	0	0
1063	DE-0209604	NA	NA	NA	53	54	f	l	t	NaN	r	0	gb	0	0	0	0	0	0	0	0	0	0	0	NaN	4	0	0	NA	NA	NA	NA	NA	0	0	0	0	0	0	0	0	0	0	0	0	0	0	0	0
1064	DE-0209663	NA	NA	NA	53	53	f	l	f	NaN	r	0	gb	1	0	0	0	0	0	0	0	0	1	0	NaN	5	0	0	NA	NA	NA	NA	NA	0	0	0	0	0	0	0	0	0	0	0	0	0	0	0	0
1065	DE-0209700	NA	NA	NA	46	46	f	l	t	NaN	l	0	gb	0	1	0	0	0	0	0	0	0	0	0	NaN	10	0	0	NA	NA	NA	NA	NA	0	0	0	0	0	0	0	0	0	0	0	0	0	0	0	0
1066	DE-0209741	NA	NA	NA	44	45	f	ST	CC	NaN	l	0	gb	0	0	0	0	0	0	0	0	0	0	0	NaN	7	0	0	NA	NA	NA	NA	NA	0	0	0	0	0	0	0	0	0	0	0	0	0	0	0	0
1067	DE-0209750	NA	NA	NA	61	61	f	l	t	NaN	r	0	gb	0	0	0	0	0	0	0	0	0	0	0	NaN	4	0	0	NA	NA	NA	NA	NA	0	0	0	0	0	0	0	0	0	0	0	0	0	0	0	0
1068	DE-0209789	NA	NA	NA	55	55	f	l	p	NaN	l	0	gb	0	0	0	0	0	0	0	0	0	0	0	NaN	9	0	0	NA	NA	NA	NA	NA	0	0	0	0	0	0	0	0	0	0	0	0	0	0	0	0
1069	DE-0209806	NA	NA	NA	52	52	f	l	t	NaN	r	0	gb	0	0	0	0	0	0	0	0	0	0	0	NaN	5	0	0	NA	NA	NA	NA	NA	0	0	0	0	0	0	0	0	0	0	0	0	0	0	0	0
1070	DE-0209828	NA	NA	NA	36	37	m	l	f	NaN	r	0	gb	1	0	0	0	0	0	0	0	0	0	0	NaN	NA	NA	NA	NA	NA	NA	NA	NA	NA	NA	NA	NA	NA	NA	NA	NA	NA	NA	NA	NA	NA	NA	NA	NA
1071	DE-0209833	NA	NA	NA	82	82	m	l	o	NaN	r	0	gb	0	0	0	0	0	0	0	0	0	0	0	NaN	10	0	0	NA	NA	NA	NA	NA	0	0	0	0	0	0	0	0	0	0	0	0	0	0	0	0
1072	DE-0209880	NA	NA	NA	57	56	m	l	f	NaN	l	0	gb	0	0	0	0	0	0	0	0	0	0	0	NaN	8	0	0	NA	NA	NA	NA	NA	0	0	0	0	0	0	0	0	0	0	0	0	0	0	0	0
1073	DE-0210195	NA	NA	NA	75	75	f	l	p	NaN	l	0	gb	0	0	0	0	0	0	0	0	0	0	0	NaN	5	0	0	NA	NA	NA	NA	NA	0	0	0	0	0	0	0	0	0	0	0	0	0	0	0	0
1074	DE-0210218	NA	NA	NA	48	48	m	B	B	NaN	NA	0	gb	0	0	0	0	0	0	0	0	0	0	0	NaN	6	0	0	NA	NA	NA	NA	NA	0	0	0	0	0	0	0	0	0	0	0	0	0	0	0	0
1075	DE-0210451	NA	NA	NA	62	62	m	l	f	NaN	l	0	gb	0	0	0	0	0	0	0	0	0	0	0	NaN	6	0	0	NA	NA	NA	NA	NA	0	0	0	0	0	0	0	0	0	0	0	0	0	0	0	0
1076	DE-0210469	NA	NA	NA	36	36	m	B	B	NaN	NA	0	gb	1	0	0	0	0	0	0	0	0	0	0	NaN	20	1	0	NA	NA	NA	NA	NA	0	0	0	0	0	0	0	0	0	0	0	0	0	0	0	0
1077	DE-0210495	NA	NA	NA	77	77	m	l	o	NaN	l	0	gb	1	0	0	0	0	0	0	0	0	0	0	NaN	6	0	0	NA	NA	NA	NA	NA	0	0	0	0	0	0	0	0	0	0	0	0	0	0	0	0
1078	DE-0210576	NA	NA	NA	63	64	m	l	f	NaN	r	0	gb	0	0	0	0	0	0	0	0	0	0	0	NaN	9	0	0	NA	NA	NA	NA	NA	0	0	0	0	0	0	0	0	0	0	0	0	0	0	0	0
1079	DE-0210617	NA	NA	NA	61	61	f	B	B	NaN	NA	1	gb	0	0	0	0	0	0	0	0	0	0	0	NaN	5	0	0	NA	NA	NA	NA	NA	0	0	0	0	0	0	0	0	0	0	0	0	0	0	0	0
1080	DE-0210770	NA	NA	NA	74	74	m	B	B	NaN	NA	0	gb	0	0	0	0	0	0	0	0	0	0	0	NaN	8	0	0	NA	NA	NA	NA	NA	0	0	0	0	0	0	0	0	0	0	0	0	0	0	0	0
1081	DE-0210956	NA	NA	NA	71	71	f	l	t	NaN	r	0	gb	0	0	1	0	0	0	0	0	0	0	0	NaN	11	0	0	NA	NA	NA	NA	NA	0	0	0	0	0	0	0	0	0	0	0	0	0	0	0	0
1082	DE-0210998	NA	NA	NA	31	31	f	B	B	NaN	NA	0	gb	0	0	0	0	0	0	0	0	0	0	0	NaN	6	0	0	NA	NA	NA	NA	NA	0	0	0	0	0	0	0	0	0	0	0	0	0	0	0	0
1083	DE-0211014	NA	NA	NA	68	68	f	l	f	NaN	l	0	gb	0	0	0	0	0	0	0	0	0	0	0	NaN	100	1	0	NA	NA	NA	NA	NA	0	0	0	0	0	0	0	0	0	0	0	0	0	0	0	0
1084	DE-0211098	NA	NA	NA	51	55	m	l	p	NaN	l	0	gb	0	0	0	0	0	0	0	0	0	0	0	NaN	5	0	0	NA	NA	NA	NA	NA	0	0	0	0	0	0	0	0	0	0	0	0	0	0	0	0
1085	DE-0211103	NA	NA	NA	47	47	f	l	t	NaN	r	0	gb	0	0	0	0	0	0	0	0	0	0	0	NaN	4	0	0	NA	NA	NA	NA	NA	0	0	0	0	0	0	0	0	0	0	0	0	0	0	0	0
1086	DE-0211248	NA	NA	NA	48	48	f	l	t	NaN	l	0	gb	0	0	0	0	1	0	0	0	0	0	0	NaN	9	0	0	NA	NA	NA	NA	NA	0	0	0	0	0	0	0	0	0	0	0	0	0	0	0	0
1087	DE-0211608	NA	NA	NA	51	51	m	l	p	NaN	l	0	gb	0	0	0	0	0	0	0	0	0	0	0	NaN	8	0	0	NA	NA	NA	NA	NA	0	0	0	0	0	0	0	0	0	0	0	0	0	0	0	0
1088	DE-0211750	NA	NA	NA	48	48	m	l	t	NaN	r	0	gb	0	0	0	0	0	0	0	0	0	0	0	NaN	4	0	0	NA	NA	NA	NA	NA	0	0	0	0	0	0	0	0	0	0	0	0	0	0	0	0
1089	DE-0211753	NA	NA	NA	50	50	m	B	B	NaN	NA	0	gb	0	0	0	0	0	0	0	0	0	0	0	NaN	6	0	0	NA	NA	NA	NA	NA	0	0	0	0	0	0	0	0	0	0	0	1	0	0	0	0
1090	DE-0211781	NA	NA	NA	57	58	m	B	B	NaN	NA	0	gb	0	0	0	0	0	0	0	0	0	0	0	NaN	6	0	0	NA	NA	NA	NA	NA	0	0	0	0	0	0	0	0	0	0	0	0	0	0	0	0
1091	DE-0211834	NA	NA	NA	65	70	f	l	f	NaN	r	0	gb	0	0	0	0	0	0	0	0	0	0	0	NaN	NA	NA	NA	NA	NA	NA	NA	NA	NA	NA	NA	NA	NA	NA	NA	NA	NA	NA	NA	NA	NA	NA	NA	NA
1092	DE-0212067	NA	NA	NA	45	45	m	IT	BS	NaN	NA	0	gb	1	0	1	0	0	0	0	0	0	0	0	NaN	NA	NA	NA	NA	NA	NA	NA	NA	NA	NA	NA	NA	NA	NA	NA	NA	NA	NA	NA	NA	NA	NA	NA	NA
1093	DE-0212090	NA	NA	NA	35	35	m	B	B	NaN	NA	0	gb	0	0	0	0	0	0	0	0	0	0	0	NaN	4	0	0	NA	NA	NA	NA	NA	0	0	0	0	0	0	0	0	0	0	0	0	0	0	0	0
1094	DE-0212116	NA	NA	NA	58	58	f	l	t	NaN	r	0	gb	1	0	0	0	0	0	0	0	0	0	0	NaN	7	0	0	NA	NA	NA	NA	NA	0	0	0	0	0	0	0	0	0	0	0	0	0	0	0	0
1095	DE-0212187	NA	NA	NA	34	34	m	B	B	NaN	NA	0	gb	0	0	1	0	0	0	0	0	0	0	0	NaN	9	0	0	NA	NA	NA	NA	NA	0	0	0	0	0	0	0	0	0	0	0	0	0	0	0	0
1096	DE-0212222	NA	NA	NA	69	70	m	l	t	NaN	r	0	gb	0	0	0	0	0	0	0	0	0	0	0	NaN	7	0	0	NA	NA	NA	NA	NA	0	0	0	0	0	0	0	0	0	0	0	0	0	0	0	0
1097	DE-0212246	NA	NA	NA	54	54	m	l	p	NaN	r	0	gb	0	0	0	0	0	0	0	0	0	0	0	NaN	7	0	0	NA	NA	NA	NA	NA	0	0	0	0	0	0	0	0	0	0	0	0	0	0	0	0
1098	DE-0212274	NA	NA	NA	73	73	f	l	p	NaN	l	0	gb	0	0	0	0	0	0	0	0	0	0	0	NaN	5	0	0	NA	NA	NA	NA	NA	0	0	0	0	0	0	0	0	0	0	0	0	0	0	0	0
1099	DE-0212426	NA	NA	NA	59	60	f	B	B	NaN	r	0	gb	0	0	0	0	0	0	0	0	0	0	0	NaN	6	0	0	NA	NA	NA	NA	NA	0	0	0	0	0	0	0	0	0	0	0	0	0	0	0	0
1100	DE-0212494	NA	NA	NA	25	25	m	l	p	NaN	r	0	gb	0	0	0	0	0	0	0	0	0	0	0	NaN	6	0	0	NA	NA	NA	NA	NA	0	0	0	0	0	0	0	0	0	0	0	0	0	0	0	0
1101	DE-0212537	NA	NA	NA	64	64	m	ml	po	NaN	l	0	gb	0	0	0	0	0	0	0	0	0	0	0	NaN	8	0	0	NA	NA	NA	NA	NA	0	0	0	0	0	0	0	0	0	0	0	0	0	0	0	0
1102	DE-0212553	NA	NA	NA	25	25	m	l	f	NaN	r	0	gb	0	0	0	0	0	0	0	0	0	0	0	NaN	7	0	0	NA	NA	NA	NA	NA	0	0	0	0	0	0	0	0	0	0	0	0	0	0	0	0
1103	DE-0212557	NA	NA	NA	58	59	f	B	B	NaN	NA	0	gb	0	0	0	0	0	0	0	0	0	0	0	NaN	5	0	0	NA	NA	NA	NA	NA	0	0	0	0	0	0	0	0	0	0	0	0	0	0	0	0
1104	DE-0212587	NA	NA	NA	66	66	m	l	t	NaN	l	0	gb	0	0	0	0	0	0	0	0	0	0	0	NaN	6	0	0	NA	NA	NA	NA	NA	0	0	0	0	0	0	0	0	0	0	0	0	0	0	0	0
1105	DE-0212677	NA	NA	NA	85	85	m	l	t	NaN	r	0	gb	0	0	0	0	0	0	0	0	0	0	0	NaN	NA	NA	NA	NA	NA	NA	NA	NA	NA	NA	NA	NA	NA	NA	NA	NA	NA	NA	NA	NA	NA	NA	NA	NA
1106	DE-0212713	NA	NA	NA	38	38	f	ST	CH	NaN	b	0	gb	1	0	0	0	0	0	0	0	0	0	0	NaN	6	0	0	NA	NA	NA	NA	NA	0	0	0	0	0	0	0	0	0	0	0	0	0	0	0	0
1107	DE-0212746	NA	NA	NA	51	52	f	B	B	NaN	NA	0	gb	0	0	0	0	0	0	0	0	0	0	0	NaN	NA	NA	NA	NA	NA	NA	NA	NA	NA	NA	NA	NA	NA	NA	NA	NA	NA	NA	NA	NA	NA	NA	NA	NA
1108	DE-0212860	NA	NA	NA	37	38	f	l	f	NaN	l	0	gb	1	0	0	0	0	0	0	0	0	0	0	NaN	8	0	0	NA	NA	NA	NA	NA	0	0	0	0	0	0	0	0	0	0	0	0	0	0	0	0
1109	DE-0212967	NA	NA	NA	75	75	m	B	B	NaN	NA	0	gb	0	0	0	0	0	0	0	0	0	0	0	NaN	9	0	0	NA	NA	NA	NA	NA	0	0	0	0	0	0	0	0	0	0	0	0	0	0	0	0
1110	DE-0213040	NA	NA	NA	54	54	f	l	t	NaN	r	0	gb	0	0	0	0	0	0	0	0	0	0	0	NaN	6	0	0	NA	NA	NA	NA	NA	0	0	0	0	0	0	0	0	0	0	0	0	0	0	0	0
1111	DE-0213042	NA	NA	NA	36	36	m	l	f	NaN	r	0	gb	0	0	0	0	0	0	0	0	0	0	0	NaN	NA	NA	NA	NA	NA	NA	NA	NA	NA	NA	NA	NA	NA	NA	NA	NA	NA	NA	NA	NA	NA	NA	NA	NA
1112	DE-0213052	NA	NA	NA	65	65	m	l	t	NaN	r	0	gb	1	0	0	0	0	0	0	0	0	0	0	NaN	6	0	0	NA	NA	NA	NA	NA	0	0	0	0	0	0	0	0	0	0	0	0	0	0	0	0
1113	DE-0213453	NA	NA	NA	73	73	f	l	o	NaN	l	0	gb	0	0	1	0	0	0	0	0	0	0	0	NaN	4	0	0	NA	NA	NA	NA	NA	0	0	0	0	0	0	0	0	0	0	0	0	0	0	0	0
1114	DE-0213496	NA	NA	NA	68	68	m	l	p	NaN	r	0	gb	0	0	1	0	0	0	0	0	0	0	0	NaN	6	0	0	NA	NA	NA	NA	NA	0	0	0	0	0	0	0	0	0	0	0	0	0	0	0	0
1115	DE-0213518	NA	NA	NA	64	64	m	l	t	NaN	l	0	gb	0	0	1	0	0	0	0	0	0	0	0	NaN	7	0	0	NA	NA	NA	NA	NA	0	0	0	0	0	0	0	0	0	0	0	0	0	0	0	0
1116	DE-0213673	NA	NA	NA	57	57	m	l	f	NaN	r	0	gb	0	0	0	0	0	0	0	0	0	0	0	NaN	8	0	0	NA	NA	NA	NA	NA	0	0	0	0	0	0	0	0	0	0	0	0	0	0	0	0
1117	DE-0213702	NA	NA	NA	71	71	m	l	p	NaN	r	0	gb	0	0	1	0	0	0	0	0	0	0	0	NaN	6	0	0	NA	NA	NA	NA	NA	0	0	0	0	0	0	0	0	0	0	0	0	0	0	0	0
1118	DE-0213744	NA	NA	NA	65	65	m	l	t	NaN	r	0	gb	0	0	1	0	0	0	0	0	0	0	0	NaN	NA	NA	NA	NA	NA	NA	NA	NA	NA	NA	NA	NA	NA	NA	NA	NA	NA	NA	NA	NA	NA	NA	NA	NA
1119	DE-0213777	NA	NA	NA	60	60	m	l	f	NaN	r	0	gb	0	0	1	0	0	0	0	0	0	0	0	NaN	8	0	0	NA	NA	NA	NA	NA	0	0	0	0	0	0	0	0	0	0	0	0	0	0	0	0
1120	DE-0213781	NA	NA	NA	64	64	m	l	p	NaN	NA	0	gb	0	0	0	0	0	0	0	0	0	0	0	NaN	5	0	0	NA	NA	NA	NA	NA	0	0	0	0	0	0	0	0	0	0	0	0	0	0	0	0
1121	DE-0213792	NA	NA	NA	31	31	m	l	p	NaN	l	0	gb	0	0	0	0	0	0	0	0	0	0	0	NaN	7	0	0	NA	NA	NA	NA	NA	0	0	0	0	0	0	0	0	0	0	0	0	0	0	0	0
1122	DE-0213886	NA	NA	NA	43	43	m	l	t	NaN	r	0	gb	0	0	1	0	0	0	0	0	0	0	0	NaN	6	0	0	NA	NA	NA	NA	NA	0	0	0	0	0	0	0	0	0	0	0	0	0	0	0	0
1123	DE-0213983	NA	NA	NA	56	56	f	l	f	NaN	r	0	gb	0	0	0	0	0	0	0	0	0	0	0	NaN	5	0	0	NA	NA	NA	NA	NA	0	0	0	0	0	0	0	0	0	0	0	0	0	0	0	0
1124	DE-0214064	NA	NA	NA	60	61	f	l	f	NaN	l	0	gb	0	0	0	0	0	0	0	0	0	0	0	NaN	8	0	0	NA	NA	NA	NA	NA	0	0	0	0	0	0	0	0	0	0	0	0	0	0	0	0
1125	DE-0214071	NA	NA	NA	42	42	m	B	B	NaN	NA	0	gb	0	0	0	0	0	0	0	0	0	0	0	NaN	NA	NA	NA	NA	NA	NA	NA	NA	NA	NA	NA	NA	NA	NA	NA	NA	NA	NA	NA	NA	NA	NA	NA	NA
1126	DE-0214383	NA	NA	NA	52	52	m	l	p	NaN	r	0	gb	0	0	0	0	0	0	0	0	0	0	0	NaN	NA	NA	NA	NA	NA	NA	NA	NA	NA	NA	NA	NA	NA	NA	NA	NA	NA	NA	NA	NA	NA	NA	NA	NA
1127	DE-0214396	NA	NA	NA	38	38	m	l	f	NaN	r	0	gb	1	0	0	0	0	0	0	0	0	0	0	NaN	NA	NA	NA	NA	NA	NA	NA	NA	NA	NA	NA	NA	NA	NA	NA	NA	NA	NA	NA	NA	NA	NA	NA	NA
1128	DE-0214494	NA	NA	NA	83	83	m	l	t	NaN	r	0	gb	0	0	0	0	0	0	0	0	0	0	0	NaN	4	0	0	NA	NA	NA	NA	NA	0	0	0	0	0	0	0	0	0	0	0	0	0	0	0	0
1129	DE-0214548	NA	NA	NA	60	60	m	l	t	NaN	l	0	gb	0	0	0	0	0	0	0	0	0	0	0	NaN	11	0	0	NA	NA	NA	NA	NA	0	0	0	0	0	0	0	0	0	0	0	0	0	0	0	0
1130	DE-0214630	NA	NA	NA	66	66	m	l	f	NaN	r	0	gb	0	0	0	0	0	0	0	0	0	0	0	NaN	4	0	0	NA	NA	NA	NA	NA	0	0	0	0	0	0	0	0	0	0	0	0	0	0	0	0
1131	DE-0214697	NA	NA	NA	13	14	f	ST	TH	NaN	r	0	gb	0	0	0	0	0	0	0	0	0	0	0	NaN	9	0	0	NA	NA	NA	NA	NA	0	0	0	0	0	0	0	0	0	0	0	0	0	0	0	0
1132	DE-0214880	NA	NA	NA	65	65	m	ml	tp	NaN	r	0	gb	0	0	0	0	0	0	0	0	0	0	0	NaN	8	0	0	NA	NA	NA	NA	NA	0	0	0	0	0	0	0	0	0	0	0	0	0	0	0	0
1133	DE-0215094	NA	NA	NA	68	68	m	l	t	NaN	r	0	gb	0	0	0	0	0	0	0	0	0	0	0	NaN	9	0	0	NA	NA	NA	NA	NA	0	0	0	0	0	0	0	0	0	0	0	0	0	0	0	0
1134	DE-0215210	NA	NA	NA	63	63	m	l	f	NaN	r	0	gb	0	0	0	0	0	0	0	0	0	0	0	NaN	8	0	0	NA	NA	NA	NA	NA	0	0	0	0	0	0	0	0	0	0	0	0	0	0	0	0
1135	DE-0215220	NA	NA	NA	65	66	m	l	f	NaN	r	0	gb	0	0	0	0	1	0	0	0	1	0	0	NaN	11	0	0	NA	NA	NA	NA	NA	0	0	0	0	0	0	0	0	0	0	0	0	0	0	0	0
1136	DE-0215330	NA	NA	NA	56	56	f	l	t	NaN	r	0	gb	0	0	0	0	0	0	0	0	0	0	0	NaN	6	0	0	NA	NA	NA	NA	NA	0	0	0	0	0	0	0	0	0	0	0	0	0	0	0	0
1137	DE-0215341	NA	NA	NA	51	51	m	ml	tp	NaN	r	1	gb	0	0	1	0	0	0	0	0	0	0	0	NaN	8	0	0	NA	NA	NA	NA	NA	0	0	0	0	0	0	0	0	0	0	0	0	0	0	0	0
1138	DE-0215343	NA	NA	NA	40	40	f	l	f	NaN	l	1	gb	0	0	0	0	0	0	0	0	0	0	0	NaN	10	0	0	NA	NA	NA	NA	NA	0	0	0	0	0	0	0	0	0	0	0	0	0	0	0	0
1139	DE-0215533	NA	NA	NA	60	61	f	l	f	NaN	l	0	gb	0	0	0	0	0	0	0	0	0	0	0	NaN	NA	NA	NA	NA	NA	NA	NA	NA	NA	NA	NA	NA	NA	NA	NA	NA	NA	NA	NA	NA	NA	NA	NA	NA
1140	DE-0215726	NA	NA	NA	66	66	f	l	p	NaN	r	0	gb	0	0	1	0	0	0	0	0	0	0	0	NaN	10	0	0	NA	NA	NA	NA	NA	0	0	0	0	0	0	0	0	0	0	0	0	0	0	0	0
1141	DE-0215908	NA	NA	NA	36	36	m	l	f	NaN	r	0	gb	1	0	0	0	0	0	0	0	0	0	0	NaN	4	0	0	NA	NA	NA	NA	NA	0	0	0	0	0	0	0	0	0	0	0	0	0	0	0	0
1142	DE-0216053	NA	NA	NA	52	52	f	l	f	NaN	NA	0	gb	0	0	0	0	0	0	0	0	0	0	0	NaN	7	0	0	NA	NA	NA	NA	NA	0	0	0	0	0	0	0	0	0	0	0	0	0	0	0	0
1143	DE-0216147	NA	NA	NA	57	57	f	l	o	NaN	NA	0	gb	0	0	0	1	0	0	0	0	0	0	0	NaN	19	1	0	NA	NA	NA	NA	NA	0	0	0	0	0	0	0	0	0	0	0	0	0	0	0	0
1144	DE-0216174	NA	NA	NA	62	62	m	B	B	NaN	NA	0	gb	0	0	0	0	0	0	0	0	0	0	0	NaN	7	0	0	NA	NA	NA	NA	NA	0	0	0	0	0	0	0	0	0	0	0	0	0	0	0	0
1145	DE-0216235	NA	NA	NA	72	72	f	l	p	NaN	l	0	gb	0	0	0	0	0	0	0	0	0	0	0	NaN	3	0	0	NA	NA	NA	NA	NA	0	0	0	0	0	0	0	0	0	0	0	0	0	0	0	0
1146	DE-0216250	NA	NA	NA	46	46	m	l	t	NaN	l	0	gb	0	0	1	0	0	0	0	0	0	0	0	NaN	5	0	0	NA	NA	NA	NA	NA	0	0	0	0	0	0	0	0	0	0	0	0	0	0	0	0
1147	DE-0216297	NA	NA	NA	68	68	m	B	B	NaN	NA	0	gb	0	0	0	0	0	0	0	0	0	0	0	NaN	11	0	0	NA	NA	NA	NA	NA	0	1	0	0	0	0	0	0	0	0	0	0	0	0	0	0
1148	DE-0216340	NA	NA	NA	71	71	f	l	t	NaN	r	0	gb	0	0	0	0	0	0	0	0	0	0	0	NaN	9	0	0	NA	NA	NA	NA	NA	0	0	0	0	0	0	0	0	0	0	0	0	0	0	0	0
1149	DE-0216361	NA	NA	NA	60	61	m	B	B	NaN	NA	0	gb	0	0	0	0	0	0	0	0	0	0	0	NaN	6	0	0	NA	NA	NA	NA	NA	0	0	0	0	0	0	0	0	0	0	0	0	0	0	0	0
1150	DE-0216505	NA	NA	NA	52	52	m	l	p	NaN	l	0	gb	1	0	0	0	0	0	0	0	0	0	0	NaN	6	0	0	NA	NA	NA	NA	NA	0	0	0	0	0	0	0	0	0	0	0	0	0	0	0	0
1151	DE-0216642	NA	NA	NA	67	67	f	B	B	NaN	NA	1	gb	0	0	1	0	0	0	0	0	0	0	0	NaN	4	0	0	NA	NA	NA	NA	NA	0	0	0	0	0	0	0	0	0	0	0	0	0	0	0	0
1152	DE-0216648	NA	NA	NA	65	65	m	l	t	NaN	l	0	gb	0	0	1	0	0	0	0	0	0	0	0	NaN	6	0	0	NA	NA	NA	NA	NA	0	0	0	0	0	0	0	0	0	0	0	0	0	0	0	0
1153	DE-0216680	NA	NA	NA	44	44	f	B	B	NaN	l	0	gb	1	0	0	0	0	0	0	0	0	0	0	NaN	13	0	0	NA	NA	NA	NA	NA	0	0	0	0	0	0	0	0	0	0	0	0	0	0	0	0
1154	DE-0216716	NA	NA	NA	79	79	m	l	p	NaN	r	0	gb	0	0	0	0	0	0	0	0	0	0	0	NaN	9	0	0	NA	NA	NA	NA	NA	0	0	0	0	0	0	0	0	0	0	0	0	0	0	0	0
1155	DE-0216755	NA	NA	NA	47	47	m	l	o	NaN	l	0	gb	1	0	0	0	0	0	0	0	0	1	0	NaN	4	0	0	NA	NA	NA	NA	NA	0	0	0	0	0	0	0	0	0	0	0	0	0	0	0	0
1156	DE-0216808	NA	NA	NA	73	73	f	B	B	NaN	NA	0	gb	0	0	0	0	0	0	0	0	0	0	0	NaN	9	0	0	NA	NA	NA	NA	NA	0	0	0	0	0	0	0	0	0	0	0	0	0	0	0	0
1157	DE-0216817	NA	NA	NA	57	58	m	B	B	NaN	l	0	gb	0	0	0	0	0	0	0	0	0	0	0	NaN	11	0	0	NA	NA	NA	NA	NA	0	0	0	0	0	0	0	0	0	0	0	0	0	0	0	0
1158	DE-0216855	NA	NA	NA	72	73	f	l	f	NaN	r	0	gb	0	0	0	0	0	0	0	0	0	0	0	NaN	14	0	0	NA	NA	NA	NA	NA	0	0	0	0	0	0	0	0	0	0	0	0	0	0	0	0
1159	DE-0216865	NA	NA	NA	70	70	m	l	f	NaN	r	0	gb	0	0	0	0	0	0	0	0	0	0	0	NaN	7	0	0	NA	NA	NA	NA	NA	0	0	0	0	0	0	0	0	0	0	0	0	0	0	0	0
1160	DE-0216876	NA	NA	NA	70	70	f	B	B	NaN	r	0	gb	0	0	0	0	0	0	0	0	0	0	0	NaN	11	0	0	NA	NA	NA	NA	NA	0	0	0	0	0	0	0	0	0	0	0	0	0	0	0	0
1161	DE-0216927	NA	NA	NA	69	69	m	B	B	NaN	r	0	gb	0	0	0	0	0	0	0	0	0	0	0	NaN	6	0	0	NA	NA	NA	NA	NA	0	0	0	0	0	0	0	0	0	0	0	0	0	0	0	0
1162	DE-0216951	NA	NA	NA	82	82	m	l	p	NaN	r	0	gb	0	0	0	0	0	0	0	0	0	0	0	NaN	7	0	0	NA	NA	NA	NA	NA	0	0	0	0	0	0	0	0	0	0	0	0	0	0	0	0
1163	DE-0217052	NA	NA	NA	64	65	m	l	f	NaN	l	0	gb	0	0	0	0	0	0	0	0	0	0	0	NaN	6	0	0	NA	NA	NA	NA	NA	0	0	0	0	0	0	0	0	0	0	0	0	0	0	0	0
1164	DE-0217097	NA	NA	NA	51	54	m	B	B	NaN	NA	0	gb	0	0	0	0	0	0	0	0	0	0	0	NaN	NA	NA	NA	NA	NA	NA	NA	NA	NA	NA	NA	NA	NA	NA	NA	NA	NA	NA	NA	NA	NA	NA	NA	NA
1165	DE-0217124	NA	NA	NA	78	78	m	l	p	NaN	l	0	gb	0	0	0	0	0	0	0	0	0	0	0	NaN	7	0	0	NA	NA	NA	NA	NA	0	0	0	0	0	0	0	0	0	0	0	0	0	0	0	0
1166	DE-0217135	NA	NA	NA	50	50	m	l	f	NaN	r	0	gb	0	0	0	0	0	0	0	0	0	0	0	NaN	4	0	0	NA	NA	NA	NA	NA	0	0	0	0	0	0	0	0	0	0	0	0	0	0	0	0
1167	DE-0217249	NA	NA	NA	41	41	f	l	o	NaN	l	0	gb	0	0	0	0	0	0	0	0	0	0	0	NaN	6	0	0	NA	NA	NA	NA	NA	0	0	0	0	0	0	0	0	0	0	0	0	0	0	0	0
1168	DE-0217307	NA	NA	NA	45	46	m	B	B	NaN	NA	0	gb	1	0	0	0	0	0	0	0	0	1	0	NaN	NaN	NaN	NA	NA	NA	NA	NA	NA	NA	NA	NA	NA	NA	NA	NA	NA	NA	NA	NA	NA	NA	NA	NA	NA
1169	DE-0217370	NA	NA	NA	74	76	m	l	f	NaN	r	0	gb	0	0	0	0	0	0	0	0	0	0	0	NaN	8	0	0	NA	NA	NA	NA	NA	0	0	0	0	0	0	0	0	0	0	0	0	0	0	0	0
1170	DE-0217428	NA	NA	NA	76	76	f	ml	fp	NaN	r	0	gb	0	0	0	0	0	0	0	0	0	0	0	NaN	8	0	0	NA	NA	NA	NA	NA	0	0	0	0	0	0	0	0	0	0	0	0	0	0	0	0
1171	DE-0217473	NA	NA	NA	69	69	m	B	B	NaN	r	0	gb	0	0	0	0	0	0	0	0	0	0	0	NaN	6	0	0	NA	NA	NA	NA	NA	0	0	0	0	0	0	0	0	0	0	0	0	0	0	0	0
1172	DE-0217543	NA	NA	NA	49	50	m	B	B	NaN	r	0	gb	1	0	0	0	0	0	0	0	0	0	0	NaN	7	0	0	NA	NA	NA	NA	NA	0	0	0	0	0	0	0	0	0	0	0	0	0	0	0	0
1173	DE-0217609	NA	NA	NA	53	54	f	l	t	NaN	l	0	gb	0	0	0	0	0	0	0	0	0	0	0	NaN	5	0	0	NA	NA	NA	NA	NA	0	0	0	0	0	0	0	0	0	0	0	1	0	0	0	0
1174	DE-0217627	NA	NA	NA	8	10	f	ST	ST	NaN	NA	0	gb	0	0	1	0	0	0	0	0	0	0	0	NaN	NA	NA	0	NA	NA	NA	NA	NA	0	0	0	0	0	0	0	0	0	0	0	0	0	0	0	0
1175	DE-0217879	NA	NA	NA	58	59	m	l	f	NaN	r	0	gb	0	0	0	0	0	0	0	0	0	0	0	NaN	16	0	0	NA	NA	NA	NA	NA	0	0	0	0	0	0	0	0	0	0	0	0	0	0	0	0
1176	DE-0217922	NA	NA	NA	49	49	m	l	t	NaN	NA	0	gb	0	0	0	0	0	0	0	0	0	0	0	NaN	11	0	0	NA	NA	NA	NA	NA	0	0	0	0	0	0	0	0	0	0	0	0	0	0	0	0
1177	DE-0218003	NA	NA	NA	50	50	f	l	f	NaN	r	0	gb	0	0	0	0	0	0	0	0	0	0	0	NaN	9	0	0	NA	NA	NA	NA	NA	0	0	0	0	0	0	0	0	0	0	0	0	0	0	0	0
1178	DE-0218243	NA	NA	NA	68	68	m	l	t	NaN	r	0	gb	0	0	0	0	0	0	0	0	0	0	0	NaN	8	0	0	NA	NA	NA	NA	NA	0	0	0	0	0	0	0	0	0	0	0	0	0	0	0	0
1179	DE-0218349	NA	NA	NA	33	33	m	B	B	NaN	NA	0	gb	0	0	0	0	0	0	0	0	0	0	0	NaN	4	0	0	NA	NA	NA	NA	NA	0	0	0	0	0	0	0	0	0	0	0	0	0	0	0	0
1180	DE-0218431	NA	NA	NA	42	42	f	l	p	NaN	l	0	gb	0	0	0	0	0	0	0	0	0	0	0	NaN	16	0	0	NA	NA	NA	NA	NA	0	0	0	0	0	0	0	0	0	0	0	0	0	0	0	0
1181	DE-0218454	NA	NA	NA	34	35	f	l	f	NaN	NA	0	gb	0	0	0	0	0	0	0	0	0	0	0	NaN	6	0	0	NA	NA	NA	NA	NA	0	0	0	0	0	0	0	0	0	0	0	0	0	0	0	0
1182	DE-0218514	NA	NA	NA	72	72	m	l	t	NaN	l	0	gb	0	0	0	0	0	0	0	0	0	0	0	NaN	11	0	0	NA	NA	NA	NA	NA	0	0	0	0	0	0	0	0	0	0	0	0	0	0	0	0
1183	DE-0218652	NA	NA	NA	44	44	m	l	p	NaN	r	0	gb	0	0	0	0	0	0	0	0	0	0	0	NaN	12	0	0	NA	NA	NA	NA	NA	0	0	0	0	0	0	0	0	0	0	0	0	0	0	0	0
1184	DE-0218693	NA	NA	NA	73	73	f	l	f	NaN	l	0	gb	0	0	0	0	0	0	0	0	0	0	0	NaN	13	0	0	NA	NA	NA	NA	NA	0	0	0	0	0	0	0	0	0	0	0	0	0	0	0	0
1185	DE-0218829	NA	NA	NA	62	62	m	l	f	NaN	l	0	gb	0	0	0	0	0	0	0	0	0	0	0	NaN	9	0	0	NA	NA	NA	NA	NA	0	0	0	0	0	0	0	0	0	0	0	0	0	0	0	0
1186	DE-0219216	NA	NA	NA	66	66	f	B	B	NaN	NA	0	gb	0	0	0	0	0	0	0	0	0	0	0	NaN	7	0	0	NA	NA	NA	NA	NA	0	0	0	0	0	0	0	0	0	0	0	0	0	0	0	0
1187	DE-0219246	NA	NA	NA	55	55	f	l	p	NaN	l	0	gb	0	0	0	0	0	0	0	0	0	0	0	NaN	4	0	0	NA	NA	NA	NA	NA	0	0	0	0	0	0	0	0	0	0	0	0	0	0	0	0
1188	DE-0219326	NA	NA	NA	58	59	m	l	t	NaN	l	0	gb	0	0	0	0	0	0	0	0	0	0	0	NaN	5	0	0	NA	NA	NA	NA	NA	0	0	0	0	0	0	0	0	0	0	0	0	0	0	0	0
1189	DE-0219329	NA	NA	NA	63	63	f	l	t	NaN	NA	0	gb	1	0	0	0	0	0	0	0	0	0	0	NaN	7	0	0	NA	NA	NA	NA	NA	0	0	0	0	0	0	0	0	0	0	0	0	0	0	0	0
1190	DE-0219372	NA	NA	NA	75	75	f	l	t	NaN	l	0	gb	0	0	0	0	0	0	0	0	0	0	0	NaN	10	0	0	NA	NA	NA	NA	NA	0	0	0	0	0	0	0	0	0	0	0	0	0	0	0	0
1191	DE-0219436	NA	NA	NA	64	64	m	ml	ft	NaN	r	0	gb	0	0	0	0	0	0	0	0	0	0	0	NaN	8	0	0	NA	NA	NA	NA	NA	0	0	0	0	0	0	0	0	0	0	0	0	0	0	0	0
1192	DE-0219876	NA	NA	NA	65	65	m	l	p	NaN	r	0	gb	0	0	0	0	0	0	0	0	0	0	0	NaN	11	0	0	NA	NA	NA	NA	NA	0	0	0	0	0	0	0	0	0	0	0	0	0	0	0	0
1193	DE-0219908	NA	NA	NA	48	49	f	l	t	NaN	l	0	gb	0	0	1	0	0	0	0	0	0	0	0	NaN	11	0	0	NA	NA	NA	NA	NA	0	0	0	0	0	0	0	0	0	0	0	0	0	0	0	0
1194	DE-0220175	NA	NA	NA	63	64	f	l	t	NaN	r	0	gb	0	0	1	0	0	0	0	0	0	0	0	NaN	8	0	0	NA	NA	NA	NA	NA	NA	NA	NA	NA	NA	NA	NA	NA	NA	NA	NA	NA	NA	NA	NA	NA
1195	DE-0220361	NA	NA	NA	39	39	f	l	f	NaN	l	0	gb	0	0	0	0	0	0	0	0	0	0	0	NaN	6	0	0	NA	NA	NA	NA	NA	0	0	0	0	0	0	0	0	0	0	0	0	0	0	0	0
1196	DE-0220504	NA	NA	NA	67	67	m	l	t	NaN	l	0	gb	1	0	0	0	0	0	0	0	0	0	0	NaN	5	0	0	NA	NA	NA	NA	NA	0	0	0	0	0	0	0	0	0	0	0	0	0	0	0	0
1197	DE-0220520	NA	NA	NA	70	70	m	l	p	NaN	r	0	gb	0	0	0	0	0	0	0	0	0	0	0	NaN	7	0	0	NA	NA	NA	NA	NA	0	0	0	0	0	0	0	0	0	0	0	0	0	0	0	0
1198	DE-0220533	NA	NA	NA	53	53	m	l	t	NaN	r	0	gb	0	0	0	0	0	0	0	0	0	0	0	NaN	7	0	0	NA	NA	NA	NA	NA	0	0	0	0	0	0	0	0	0	0	0	0	0	0	0	0
1199	DE-0220540	NA	NA	NA	63	64	m	l	p	NaN	r	0	gb	0	0	0	0	0	0	0	0	0	0	0	NaN	6	0	0	NA	NA	NA	NA	NA	0	0	0	0	0	0	0	0	0	0	0	0	0	0	0	0
1200	DE-0220799	NA	NA	NA	62	64	m	B	B	NaN	l	0	gb	0	0	1	0	0	0	0	0	0	0	0	NaN	6	0	0	NA	NA	NA	NA	NA	0	0	0	0	0	0	0	0	0	0	0	0	0	0	0	0
1201	DE-0220804	NA	NA	NA	42	43	m	l	f	NaN	NA	0	gb	0	0	0	0	0	0	0	0	0	0	0	NaN	5	0	0	NA	NA	NA	NA	NA	0	0	0	0	0	0	0	0	0	0	0	0	0	0	0	0
1202	DE-0220831	NA	NA	NA	64	64	f	l	p	NaN	r	0	gb	1	0	0	0	0	0	0	0	0	0	0	NaN	4	0	0	NA	NA	NA	NA	NA	0	0	0	0	0	0	0	0	0	0	0	0	0	0	0	0
1203	DE-0220833	NA	NA	NA	55	56	m	B	B	NaN	NA	0	gb	0	0	1	0	0	0	0	0	0	0	0	NaN	7	0	0	NA	NA	NA	NA	NA	0	0	0	0	0	0	0	0	0	0	0	0	0	0	0	0
1204	DE-0221029	NA	NA	NA	58	58	m	l	p	NaN	r	0	gb	0	0	0	0	0	0	0	0	0	0	0	NaN	9	0	0	NA	NA	NA	NA	NA	0	0	0	0	0	0	0	0	0	0	0	0	0	0	0	0
1205	DE-0221053	NA	NA	NA	61	61	f	l	t	NaN	l	0	gb	0	0	0	0	0	0	0	0	0	0	0	NaN	6	0	0	NA	NA	NA	NA	NA	0	0	0	0	0	0	0	0	0	0	0	0	0	0	0	0
1206	DE-0221069	NA	NA	NA	73	73	f	l	f	NaN	r	0	gb	0	0	0	0	0	0	0	0	0	0	0	NaN	9	0	0	NA	NA	NA	NA	NA	0	0	0	0	0	0	0	0	0	0	0	0	0	0	0	0
1207	DE-0221090	NA	NA	NA	61	61	f	l	t	NaN	l	0	gb	0	0	0	0	0	0	0	0	0	0	0	NaN	5	0	0	NA	NA	NA	NA	NA	0	0	0	0	0	0	0	0	0	0	0	0	0	0	0	0
1208	DE-0221387	NA	NA	NA	64	65	m	l	p	NaN	l	0	gb	0	0	0	0	0	0	0	0	0	0	0	NaN	7	0	0	NA	NA	NA	NA	NA	0	0	0	0	0	0	0	0	0	0	0	0	0	0	0	0
1209	DE-0221459	NA	NA	NA	49	51	f	l	f	NaN	r	0	gb	0	0	0	0	0	0	0	0	0	0	0	NaN	6	0	0	NA	NA	NA	NA	NA	0	0	0	0	0	0	0	0	0	0	0	0	0	0	0	0
1210	DE-0221521	NA	NA	NA	62	62	f	l	p	NaN	l	0	gb	0	0	1	0	0	0	0	0	0	0	0	NaN	7	0	0	NA	NA	NA	NA	NA	0	0	0	0	0	0	0	0	0	0	0	0	0	0	0	0
1211	DE-0221546	NA	NA	NA	69	69	m	ml	to	NaN	r	0	gb	0	0	1	0	0	0	0	0	0	0	0	NaN	4	0	0	NA	NA	NA	NA	NA	0	0	0	0	0	0	0	0	0	0	0	0	0	0	0	0
1212	DE-0221552	NA	NA	NA	73	73	f	l	o	NaN	l	0	gb	0	0	0	0	0	0	0	0	0	0	0	NaN	4	0	0	NA	NA	NA	NA	NA	0	0	0	0	0	0	0	0	0	0	0	0	0	0	0	0
1213	DE-0221592	NA	NA	NA	76	76	m	l	f	NaN	l	0	gb	0	0	0	0	0	0	0	0	1	0	0	NaN	6	0	0	NA	NA	NA	NA	NA	0	0	0	0	0	0	0	0	0	0	0	0	0	0	0	0
1214	DE-0221724	NA	NA	NA	82	82	m	l	f	NaN	r	0	gb	0	0	0	0	0	0	0	0	0	0	0	NaN	13	0	0	NA	NA	NA	NA	NA	0	0	0	0	0	0	0	0	0	0	0	0	0	0	0	0
1215	DE-0221875	NA	NA	NA	54	54	m	l	p	NaN	l	0	gb	0	0	0	0	0	0	0	0	0	0	0	NaN	6	0	0	NA	NA	NA	NA	NA	0	0	0	0	0	0	0	0	0	0	0	0	0	0	0	0
1216	DE-0222019	NA	NA	NA	68	68	m	l	p	NaN	l	0	gb	0	0	0	0	0	0	0	0	0	0	0	NaN	6	0	0	NA	NA	NA	NA	NA	0	0	0	0	0	0	0	0	0	0	0	0	0	0	0	0
1217	DE-0222027	NA	NA	NA	63	63	f	B	B	NaN	NA	0	gb	0	0	1	0	0	0	0	0	0	0	0	NaN	NA	NA	NA	NA	NA	NA	NA	NA	NA	NA	NA	NA	NA	NA	NA	NA	NA	NA	NA	NA	NA	NA	NA	NA
1218	DE-0222028	NA	NA	NA	66	66	m	l	f	NaN	r	0	gb	0	0	1	0	0	0	0	0	0	0	0	NaN	7	0	0	NA	NA	NA	NA	NA	0	0	0	0	0	0	0	0	0	0	0	0	0	0	0	0
1219	DE-0222058	NA	NA	NA	78	78	m	l	t	NaN	NA	0	gb	0	0	1	0	0	0	0	0	0	0	0	NaN	9	0	0	NA	NA	NA	NA	NA	0	0	0	0	0	0	0	0	0	0	0	0	0	0	0	0
1220	DE-0222095	NA	NA	NA	37	38	m	l	f	NaN	l	0	gb	0	0	0	0	0	0	0	0	0	0	0	NaN	7	0	0	NA	NA	NA	NA	NA	0	0	0	0	0	0	0	0	0	0	0	0	0	0	0	0
1221	DE-0222143	NA	NA	NA	78	78	m	B	B	NaN	NA	0	gb	0	0	0	0	0	0	0	0	0	0	0	NaN	8	0	0	NA	NA	NA	NA	NA	0	0	0	0	0	0	0	0	0	0	0	0	0	0	0	0
1222	DE-0222213	NA	NA	NA	58	58	m	l	t	NaN	r	0	gb	0	0	1	0	0	0	0	0	0	0	0	NaN	4	0	0	NA	NA	NA	NA	NA	0	0	0	0	0	0	0	0	0	0	0	0	0	0	0	0
1223	DE-0222414	NA	NA	NA	37	37	m	ml	fp	NaN	NA	0	gb	0	0	0	0	0	0	0	0	0	0	0	NaN	6	0	0	NA	NA	NA	NA	NA	0	0	0	0	0	0	0	0	0	0	0	0	0	0	0	0
1224	DE-0222805	NA	NA	NA	54	54	m	l	t	NaN	r	0	gb	0	0	0	0	0	0	0	0	0	0	0	NaN	8	0	0	NA	NA	NA	NA	NA	0	0	0	0	0	0	0	0	0	0	0	0	0	0	0	0
1225	DE-0222897	NA	NA	NA	57	57	f	l	t	NaN	l	0	gb	1	0	0	0	0	0	0	0	0	0	0	NaN	4	0	0	NA	NA	NA	NA	NA	0	0	0	0	0	0	0	0	0	0	0	0	0	0	0	0
1226	DE-0222905	NA	NA	NA	56	57	m	l	f	NaN	r	0	gb	0	0	0	0	0	0	0	0	0	0	0	NaN	6	0	0	NA	NA	NA	NA	NA	0	0	0	0	0	0	0	0	0	0	0	0	0	0	0	0
1227	DE-0222951	NA	NA	NA	25	25	m	l	f	NaN	NA	0	gb	0	0	0	0	0	0	0	0	0	0	0	primitive neuronal component	9	0	0	NA	NA	NA	NA	NA	0	0	0	0	0	0	0	0	0	0	0	0	0	0	0	0
1228	DE-0222981	NA	NA	NA	70	70	f	B	B	NaN	NA	0	gb	0	0	1	0	0	0	0	0	0	0	0	NaN	5	0	0	NA	NA	NA	NA	NA	0	0	0	0	0	0	0	0	0	0	0	0	0	0	0	0
1229	DE-0223070	NA	NA	NA	58	58	m	l	t	NaN	r	0	gb	0	0	0	0	0	0	0	0	0	0	0	NaN	4	0	0	NA	NA	NA	NA	NA	0	0	0	0	0	0	0	0	0	0	0	0	0	0	0	0
1230	DE-0223084	NA	NA	NA	58	58	m	ml	po	NaN	r	0	gb	0	0	0	0	0	0	0	0	0	0	0	NaN	6	0	0	NA	NA	NA	NA	NA	0	0	0	0	0	0	0	0	0	0	0	0	0	0	0	0
1231	DE-0223280	NA	NA	NA	72	72	f	l	f	NaN	l	0	gb	0	0	1	0	0	0	0	0	0	0	0	NaN	6	0	0	NA	NA	NA	NA	NA	0	0	0	0	0	0	0	0	0	0	0	0	0	0	0	0
1232	DE-0223299	NA	NA	NA	32	32	f	l	f	NaN	r	0	gb	0	0	0	0	0	0	0	0	0	0	0	NaN	4	0	0	NA	NA	NA	NA	NA	0	0	0	0	0	0	0	0	0	0	0	0	0	0	0	0
1233	DE-0223304	NA	NA	NA	51	51	f	l	p	NaN	r	0	gb	0	0	0	0	0	0	0	0	0	0	0	NaN	NA	NA	NA	NA	NA	NA	NA	NA	NA	NA	NA	NA	NA	NA	NA	NA	NA	NA	NA	NA	NA	NA	NA	NA
1234	DE-0223330	NA	NA	NA	39	40	f	l	p	NaN	r	0	gb	0	0	0	0	0	0	0	0	0	0	0	NaN	4	0	0	NA	NA	NA	NA	NA	0	0	0	0	0	0	0	0	0	0	0	0	0	0	0	0
1235	DE-0223534	NA	NA	NA	44	44	f	B	B	NaN	NA	0	gb	0	0	0	0	0	0	0	0	0	0	0	NaN	6	0	0	NA	NA	NA	NA	NA	0	0	0	0	0	0	0	0	0	0	0	0	0	0	0	0
1236	DE-0223747	NA	NA	NA	62	62	m	l	f	NaN	l	0	gb	0	0	0	0	0	0	0	0	0	0	0	NaN	8	0	0	NA	NA	NA	NA	NA	0	0	0	0	0	0	0	0	0	0	0	0	0	0	0	0
1237	DE-0223910	NA	NA	NA	63	63	m	ml	fp	NaN	r	0	gb	0	0	0	0	0	0	0	0	0	0	0	NaN	3	0	0	NA	NA	NA	NA	NA	0	0	0	0	0	0	0	0	0	0	0	0	0	0	0	0
1238	DE-0224110	NA	NA	NA	26	27	f	l	t	NaN	r	0	gb	0	0	0	0	0	0	0	0	0	0	0	NaN	NaN	NaN	NA	NA	NA	NA	NA	NA	0	0	0	0	0	0	0	0	0	0	0	0	0	0	0	0
1239	DE-0224147	NA	NA	NA	70	70	f	l	f	NaN	r	0	gb	0	0	0	0	0	0	0	0	0	0	0	NaN	8	0	0	NA	NA	NA	NA	NA	0	0	0	0	0	0	0	0	0	0	0	0	0	0	0	0
1240	DE-0224206	NA	NA	NA	57	58	m	ml	ft	NaN	r	0	gb	0	0	0	0	0	0	0	0	0	0	0	NaN	NA	NA	NA	NA	NA	NA	NA	NA	NA	NA	NA	NA	NA	NA	NA	NA	NA	NA	NA	NA	NA	NA	NA	NA
1241	DE-0224298	NA	NA	NA	90	90	f	B	B	NaN	l	0	gb	0	0	1	0	0	0	0	0	0	0	0	NaN	6	0	0	NA	NA	NA	NA	NA	0	0	0	0	0	0	0	0	0	0	0	0	0	0	0	0
1242	DE-0224524	NA	NA	NA	69	69	f	l	f	NaN	r	0	gb	0	0	0	0	0	0	0	0	0	0	0	NaN	5	0	0	NA	NA	NA	NA	NA	0	0	0	0	0	0	0	0	0	0	0	0	0	0	0	0
1243	DE-0224580	NA	NA	NA	56	56	m	l	p	NaN	r	0	gb	0	0	0	0	0	0	0	0	0	0	0	NaN	4	0	0	NA	NA	NA	NA	NA	0	0	0	0	0	0	0	0	0	0	0	0	0	0	0	0
1244	DE-0224616	NA	NA	NA	85	85	m	l	t	NaN	r	0	gb	0	0	0	0	0	0	0	0	0	0	0	NaN	9	0	0	NA	NA	NA	NA	NA	0	0	0	0	0	0	0	0	0	0	0	0	0	0	0	0
1245	DE-0224628	NA	NA	NA	37	38	m	B	B	NaN	r	0	gb	0	0	0	0	0	0	0	0	0	0	0	NaN	6	0	0	NA	NA	NA	NA	NA	0	0	0	0	0	0	0	0	0	0	0	0	0	0	0	0
1246	DE-0224638	NA	NA	NA	67	67	f	l	f	NaN	r	0	gb	0	0	0	0	0	0	0	0	0	0	0	NaN	9	0	0	NA	NA	NA	NA	NA	0	0	0	0	0	0	0	0	0	0	0	0	0	0	0	0
1247	DE-0224678	NA	NA	NA	61	61	f	ST	CH	NaN	NA	0	gb	0	0	0	0	0	0	0	0	0	0	0	NaN	4	0	0	NA	NA	NA	NA	NA	0	0	0	0	0	0	0	0	0	0	0	0	0	0	0	0
1248	DE-0225215	NA	NA	NA	60	61	m	l	p	NaN	l	0	gb	1	0	0	0	0	0	0	0	0	0	0	NaN	4	0	0	NA	NA	NA	NA	NA	0	0	0	0	0	0	0	0	0	0	0	0	0	0	0	0
1249	DE-0225440	NA	NA	NA	60	60	m	B	B	NaN	r	0	gb	0	0	0	0	0	0	0	0	0	0	0	NaN	6	0	0	NA	NA	NA	NA	NA	0	0	0	0	0	0	0	0	0	0	0	0	0	0	0	0
1250	DE-0225449	NA	NA	NA	51	51	f	l	t	NaN	r	0	gb	0	0	0	0	0	0	0	0	0	0	0	NaN	6	0	0	NA	NA	NA	NA	NA	0	0	0	0	0	0	0	0	0	0	0	0	0	0	0	0
1251	DE-0225480	NA	NA	NA	63	63	m	l	t	NaN	l	0	gb	0	0	0	0	0	0	1	0	0	0	0	NaN	NaN	NaN	NA	NA	NA	NA	NA	NA	0	0	0	0	0	0	0	0	0	0	0	0	0	0	0	0
1252	DE-0225805	NA	NA	NA	19	19	f	l	f	NaN	l	0	gb	0	0	0	0	0	0	0	0	0	0	0	NaN	5	0	0	NA	NA	NA	NA	NA	0	0	0	0	0	0	0	0	0	0	0	0	0	0	0	0
1253	DE-0226201	NA	NA	NA	67	67	f	l	o	NaN	r	0	gb	0	0	0	0	0	0	0	0	0	0	0	NaN	6	0	0	NA	NA	NA	NA	NA	0	0	0	0	0	0	0	0	0	0	0	0	0	0	0	0
1254	DE-0226472	NA	NA	NA	67	69	f	l	f	NaN	l	0	gb	0	0	0	0	0	0	0	0	0	0	0	NaN	NA	NA	0	NA	NA	NA	NA	NA	NA	NA	NA	NA	NA	NA	NA	NA	NA	NA	NA	NA	NA	NA	NA	NA
1255	DE-0226473	NA	NA	NA	66	66	m	l	f	NaN	r	0	gb	0	0	0	0	0	0	0	0	0	0	0	NaN	8	0	0	NA	NA	NA	NA	NA	0	0	0	0	0	0	0	0	0	0	0	0	0	0	0	0
1256	DE-0226511	NA	NA	NA	31	32	f	B	B	NaN	r	0	gb	0	1	0	0	0	0	0	0	0	0	0	NaN	4	0	0	NA	NA	NA	NA	NA	0	0	0	0	0	0	0	0	0	0	0	0	0	0	0	0
1257	DE-0226662	NA	NA	NA	53	53	f	l	f	NaN	r	1	gb	0	0	0	0	0	0	0	0	0	0	0	NaN	6	0	0	NA	NA	NA	NA	NA	0	0	0	0	0	0	0	0	0	0	0	0	0	0	0	0
1258	DE-0226811	NA	NA	NA	34	34	m	l	f	NaN	r	0	gb	0	0	0	0	0	0	0	0	0	0	0	NaN	6	0	0	NA	NA	NA	NA	NA	0	0	0	0	0	0	0	0	0	0	0	0	0	0	0	0
1259	DE-0226849	NA	NA	NA	60	60	m	ml	po	NaN	l	0	gb	0	0	0	0	0	0	0	0	0	0	0	NaN	9	0	0	NA	NA	NA	NA	NA	0	0	0	0	0	0	0	0	0	0	0	0	0	0	0	0
1260	DE-0226874	NA	NA	NA	55	55	m	l	f	NaN	r	0	gb	0	0	0	0	0	0	0	0	1	0	0	NaN	11	0	0	NA	NA	NA	NA	NA	0	0	0	0	0	0	0	0	0	0	0	0	0	0	0	0
1261	DE-0226881	NA	NA	NA	62	63	m	l	f	NaN	l	0	gb	0	0	0	0	0	0	0	0	0	0	0	NaN	4	0	0	NA	NA	NA	NA	NA	0	0	0	0	0	0	0	0	0	0	0	0	0	0	0	0
1262	DE-0227424	NA	NA	NA	61	61	f	l	t	NaN	l	0	gb	0	0	0	0	0	0	0	0	0	0	0	NaN	4	0	0	NA	NA	NA	NA	NA	0	0	0	0	0	0	0	0	0	0	0	0	0	0	0	0
1263	DE-0227442	NA	NA	NA	54	54	m	l	f	NaN	l	0	gb	0	0	1	0	0	0	0	0	0	0	0	NaN	8	0	0	NA	NA	NA	NA	NA	NA	NA	NA	NA	NA	NA	NA	NA	NA	NA	NA	NA	NA	NA	NA	NA
1264	DE-0227445	NA	NA	NA	55	55	f	l	f	NaN	l	0	gb	0	0	0	0	0	0	0	0	0	0	0	NaN	7	0	0	NA	NA	NA	NA	NA	0	0	0	0	0	0	0	0	0	0	0	0	0	0	0	0
1265	DE-0227860	NA	NA	NA	62	62	m	l	f	NaN	l	0	gb	0	0	0	0	0	0	0	0	0	0	0	NaN	7	0	0	NA	NA	NA	NA	NA	0	0	0	0	0	0	0	0	0	0	0	0	0	0	0	0
1266	DE-0227876	NA	NA	NA	69	69	m	B	B	NaN	l	0	gb	0	0	0	0	0	0	0	0	0	0	0	NaN	5	0	0	NA	NA	NA	NA	NA	0	0	0	0	0	0	0	0	0	0	0	0	0	0	0	0
1267	DE-0227881	NA	NA	NA	80	80	m	l	p	NaN	l	0	gb	0	0	1	0	0	0	0	0	0	0	0	NaN	8	0	0	NA	NA	NA	NA	NA	0	0	0	0	0	0	0	0	0	0	0	0	0	0	0	0
1268	DE-0227911	NA	NA	NA	57	58	m	l	t	NaN	l	0	gb	0	0	1	0	0	0	0	0	0	0	0	NaN	NA	NA	0	NA	NA	NA	NA	NA	NA	NA	NA	NA	NA	NA	NA	NA	NA	NA	NA	NA	NA	NA	NA	NA
1269	DE-0227926	NA	NA	NA	48	49	f	l	p	NaN	l	0	gb	0	0	0	0	0	0	0	0	0	0	0	NaN	NaN	NaN	NA	NA	NA	NA	NA	NA	0	0	0	0	0	0	0	0	0	0	0	0	0	0	0	0
1270	DE-0227984	NA	NA	NA	21	21	m	l	f	NaN	r	0	gb	1	0	0	0	0	0	1	0	0	1	0	NaN	4	0	0	NA	NA	NA	NA	NA	0	0	0	0	0	0	0	0	0	0	0	0	0	0	0	0
1271	DE-0228049	NA	NA	NA	28	30	f	l	f	NaN	r	0	gb	0	0	0	0	0	0	0	0	0	0	0	NaN	5	0	0	NA	NA	NA	NA	NA	0	0	0	0	0	0	0	0	0	0	0	0	0	0	0	0
1272	DE-0228092	NA	NA	NA	56	56	f	B	B	NaN	NA	0	gb	0	0	0	0	0	0	0	0	0	0	0	NaN	5	0	0	NA	NA	NA	NA	NA	0	0	0	0	0	0	0	0	0	0	0	0	0	0	0	0
1273	DE-0228171	NA	NA	NA	63	63	f	B	B	NaN	NA	0	gb	0	0	0	0	0	0	0	0	0	0	0	NaN	9	0	0	NA	NA	NA	NA	NA	0	0	0	0	0	0	0	0	0	0	0	0	0	0	0	0
1274	DE-0228186	NA	NA	NA	59	58	m	B	B	NaN	NA	0	gb	1	0	1	0	0	0	0	0	0	0	0	NaN	4	0	0	NA	NA	NA	NA	NA	0	0	0	0	0	0	0	0	0	0	0	0	0	0	0	0
1275	DE-0228194	NA	NA	NA	43	44	m	l	f	NaN	r	0	gb	0	0	1	0	0	0	0	0	0	0	0	NaN	11	0	0	NA	NA	NA	NA	NA	0	0	0	0	0	0	0	0	0	0	0	0	0	0	0	0
1276	DE-0228363	NA	NA	NA	43	44	f	B	B	NaN	NA	0	gb	0	0	0	0	0	0	0	0	0	0	0	NaN	7	0	0	NA	NA	NA	NA	NA	0	0	0	0	0	0	0	0	0	0	0	0	0	0	0	0
1277	DE-0228387	NA	NA	NA	59	59	m	l	f	NaN	r	0	gb	0	0	0	0	0	0	0	0	0	0	0	NaN	7	0	0	NA	NA	NA	NA	NA	0	0	0	0	0	0	0	0	0	0	0	0	0	0	0	0
1278	DE-0228567	NA	NA	NA	49	55	f	l	f	NaN	l	0	gb	0	0	0	0	0	0	0	0	0	0	0	NaN	NaN	NaN	NA	NA	NA	NA	NA	NA	0	0	0	0	0	0	0	0	0	0	0	0	0	0	0	0
1279	DE-0228601	NA	NA	NA	61	63	f	l	p	NaN	r	0	gb	0	0	0	0	0	0	0	0	0	0	0	NaN	7	0	0	NA	NA	NA	NA	NA	0	0	0	0	0	0	0	0	0	0	0	1	0	0	0	0
1280	DE-0228642	NA	NA	NA	32	32	f	l	t	NaN	r	0	gb	0	0	0	0	0	0	0	0	0	0	0	NaN	26	1	0	NA	NA	NA	NA	NA	0	0	0	0	0	0	0	0	0	0	0	0	0	0	0	0
1281	DE-0228662	NA	NA	NA	53	53	m	l	t	NaN	l	0	gb	0	0	0	0	0	0	0	0	0	0	0	NaN	8	0	0	NA	NA	NA	NA	NA	0	0	0	0	0	0	0	0	0	0	0	0	0	0	0	0
1282	DE-0228745	NA	NA	NA	64	64	f	l	t	NaN	r	0	gb	0	0	0	0	0	0	0	0	0	0	0	NaN	NA	NA	NA	NA	NA	NA	NA	NA	NA	NA	NA	NA	NA	NA	NA	NA	NA	NA	NA	NA	NA	NA	NA	NA
1283	DE-0228763	NA	NA	NA	73	74	m	l	f	NaN	r	0	gb	0	0	1	0	0	0	0	0	0	0	0	NaN	21	1	0	NA	NA	NA	NA	NA	0	0	0	0	0	0	0	0	0	0	0	0	0	0	0	0
1284	DE-0228826	NA	NA	NA	45	45	m	l	f	NaN	l	0	gb	0	0	0	0	0	0	0	0	0	0	0	NaN	6	0	0	NA	NA	NA	NA	NA	0	0	0	0	0	0	0	0	0	0	0	0	0	0	0	0
1285	DE-0228853	NA	NA	NA	54	54	m	B	B	NaN	l	0	gb	0	0	0	0	0	0	0	0	0	0	0	NaN	6	0	0	NA	NA	NA	NA	NA	0	0	0	0	0	0	0	0	0	0	0	0	0	0	0	0
1286	DE-0228916	NA	NA	NA	60	61	m	l	t	NaN	l	0	gb	0	0	0	0	0	0	0	0	0	0	0	NaN	14	0	0	NA	NA	NA	NA	NA	0	0	0	0	0	0	0	0	0	0	0	0	0	0	0	0
1287	DE-0229016	NA	NA	NA	70	70	m	l	o	NaN	l	0	gb	0	0	0	0	0	0	0	0	0	0	0	NaN	9	0	0	NA	NA	NA	NA	NA	0	0	0	0	0	0	0	0	0	0	0	0	0	0	0	0
1288	DE-0229083	NA	NA	NA	64	64	m	l	p	NaN	l	0	gb	0	0	0	0	0	0	0	0	0	0	0	NaN	3	0	0	NA	NA	NA	NA	NA	0	0	0	0	0	0	0	0	0	0	0	0	0	0	0	0
1289	DE-0229239	NA	NA	NA	50	51	m	l	f	NaN	r	0	gb	0	0	0	0	0	0	0	0	0	0	0	NaN	7	0	0	NA	NA	NA	NA	NA	0	0	0	0	0	0	0	0	0	0	0	0	0	0	0	0
1290	DE-0229270	NA	NA	NA	61	61	f	l	f	NaN	r	0	gb	0	0	0	0	0	0	0	0	0	0	0	NaN	9	0	0	NA	NA	NA	NA	NA	0	0	0	0	0	0	0	0	0	0	0	0	0	0	0	0
1291	DE-0229435	NA	NA	NA	64	64	m	l	f	NaN	l	0	gb	0	0	0	0	0	0	0	0	0	0	0	NaN	5	0	0	NA	NA	NA	NA	NA	0	0	0	0	0	0	0	0	0	0	0	0	0	0	0	0
1292	DE-0229474	NA	NA	NA	52	55	f	l	f	NaN	r	0	gb	0	0	0	0	0	0	0	0	0	0	0	NaN	7	0	0	NA	NA	NA	NA	NA	0	0	0	0	0	0	0	0	0	0	0	0	0	0	0	0
1293	DE-0229519	NA	NA	NA	73	73	m	ST	CC	NaN	c	0	gb	0	0	1	0	0	0	0	0	0	0	0	NaN	4	0	0	NA	NA	NA	NA	NA	0	0	0	0	0	0	0	0	0	0	0	0	0	0	0	0
1294	DE-0229593	NA	NA	NA	53	53	f	B	B	NaN	l	0	gb	1	0	0	0	0	0	0	0	0	0	0	NaN	6	0	0	NA	NA	NA	NA	NA	0	0	0	0	0	0	0	0	0	0	0	0	0	0	0	0
1295	DE-0229614	NA	NA	NA	70	70	m	l	o	NaN	r	0	gb	0	0	0	0	0	0	0	0	0	0	0	NaN	NA	NA	NA	NA	NA	NA	NA	NA	NA	NA	NA	NA	NA	NA	NA	NA	NA	NA	NA	NA	NA	NA	NA	NA
1296	DE-0229716	NA	NA	NA	70	71	m	l	t	NaN	l	0	gb	0	0	0	0	0	0	0	0	0	0	0	NaN	6	0	0	NA	NA	NA	NA	NA	0	0	0	0	0	0	0	0	0	0	0	0	0	0	0	0
1297	DE-0229972	NA	NA	NA	71	72	f	l	t	NaN	l	0	gb	0	0	0	0	0	0	0	0	0	0	0	neutrophil infiltrate	9	0	0	NA	NA	NA	NA	NA	0	0	0	0	0	0	0	0	0	0	0	0	0	0	0	0
1298	DE-0230071	NA	NA	NA	47	47	f	B	B	NaN	NA	0	gb	0	0	0	0	0	0	0	0	0	0	0	NaN	6	0	0	NA	NA	NA	NA	NA	0	0	0	0	0	0	0	0	0	0	0	0	0	0	0	0
1299	DE-0230131	NA	NA	NA	63	64	f	l	f	NaN	r	0	gb	0	0	0	0	0	0	0	0	0	0	0	NaN	6	0	0	NA	NA	NA	NA	NA	0	0	0	0	0	0	0	0	0	0	0	0	0	0	0	0
1300	DE-0230177	NA	NA	NA	60	60	f	B	B	NaN	NA	0	gb	0	0	0	0	0	0	0	0	0	0	0	NaN	10	0	0	NA	NA	NA	NA	NA	0	0	0	0	0	0	0	0	0	0	0	0	0	0	0	0
1301	DE-0230178	NA	NA	NA	50	51	m	B	B	NaN	NA	0	gb	0	0	0	0	0	0	0	0	0	0	0	NaN	5	0	0	NA	NA	NA	NA	NA	0	0	0	0	0	0	0	0	0	0	0	0	0	0	0	0
1302	DE-0230385	NA	NA	NA	48	52	m	B	B	NaN	r	0	gb	0	0	0	0	0	0	0	0	0	0	0	NaN	6	0	0	NA	NA	NA	NA	NA	0	0	0	0	0	0	0	0	0	0	0	0	0	0	0	0
1303	DE-0230974	NA	NA	NA	53	53	m	l	p	NaN	r	0	gb	0	0	0	0	0	0	0	0	0	0	0	NaN	NaN	NaN	NA	NA	NA	NA	NA	NA	NA	NA	NA	NA	NA	NA	NA	NA	NA	NA	NA	NA	NA	NA	NA	NA
1304	DE-0230987	NA	NA	NA	61	62	m	l	t	NaN	r	0	gb	0	0	0	0	0	0	0	0	0	0	0	NaN	7	0	0	NA	NA	NA	NA	NA	0	0	0	0	0	0	0	0	0	0	0	0	0	0	0	0
1305	DE-0231012	NA	NA	NA	30	30	f	l	t	NaN	r	0	gb	0	0	0	0	0	0	0	0	0	0	0	NaN	9	0	0	NA	NA	NA	NA	NA	0	0	0	0	0	0	0	0	0	0	0	0	0	0	0	0
1306	DE-0231026	NA	NA	NA	63	64	m	l	f	NaN	l	0	gb	0	0	0	0	0	0	0	0	0	0	0	NaN	4	0	0	NA	NA	NA	NA	NA	0	0	0	0	0	0	0	0	0	0	0	0	0	0	0	0
1307	DE-0231069	NA	NA	NA	59	59	m	l	t	NaN	l	0	gb	0	0	0	0	0	0	0	0	0	0	0	NaN	5	0	0	NA	NA	NA	NA	NA	0	0	0	0	0	0	0	0	0	0	0	0	0	0	0	0
1308	DE-0231125	NA	NA	NA	56	56	f	l	f	NaN	r	0	gb	0	0	0	0	0	0	0	0	0	0	0	NaN	12	0	0	NA	NA	NA	NA	NA	0	0	0	0	0	0	0	0	0	0	0	0	0	0	0	0
1309	DE-0231516	NA	NA	NA	63	63	m	l	p	NaN	r	0	gb	1	0	0	0	0	0	0	0	0	0	0	NaN	5	0	0	NA	NA	NA	NA	NA	0	0	0	0	0	0	0	0	0	0	0	0	0	0	0	0
1310	DE-0231674	NA	NA	NA	75	75	m	l	t	NaN	r	0	gb	0	0	0	0	0	0	0	0	0	0	0	NaN	6	0	0	NA	NA	NA	NA	NA	0	0	0	0	0	0	0	0	0	0	0	0	0	0	0	0
1311	DE-0231740	NA	NA	NA	60	60	f	B	B	NaN	NA	0	gb	0	0	0	0	0	0	0	0	0	0	0	NaN	6	0	0	NA	NA	NA	NA	NA	0	0	0	0	0	0	0	0	0	0	0	0	0	0	0	0
1312	DE-0231827	NA	NA	NA	73	73	f	l	f	NaN	r	0	gb	0	0	0	0	0	0	0	0	0	0	0	NaN	5	0	0	NA	NA	NA	NA	NA	0	0	0	0	0	0	0	0	0	0	0	0	0	0	0	0
1313	DE-0231828	NA	NA	NA	64	65	m	l	t	NaN	l	0	gb	0	0	0	0	0	0	0	0	0	0	0	NaN	6	0	0	NA	NA	NA	NA	NA	0	0	0	0	0	0	0	0	0	0	0	0	0	0	0	0
1314	DE-0231854	NA	NA	NA	48	48	f	l	f	NaN	NA	0	gb	1	0	0	0	0	0	0	0	0	0	0	NaN	8	0	0	NA	NA	NA	NA	NA	0	0	0	0	0	0	0	0	0	0	0	0	0	0	0	0
1315	DE-0231858	NA	NA	NA	84	84	m	l	t	NaN	r	0	gb	0	0	0	0	0	0	0	0	0	0	0	NaN	NA	NA	NA	NA	NA	NA	NA	NA	NA	NA	NA	NA	NA	NA	NA	NA	NA	NA	NA	NA	NA	NA	NA	NA
1316	DE-0231991	NA	NA	NA	58	58	m	l	t	NaN	r	0	gb	0	0	0	0	0	0	0	0	0	0	0	NaN	7	0	0	NA	NA	NA	NA	NA	0	0	0	0	0	0	0	0	0	0	0	0	0	0	0	0
1317	DE-0232173	NA	NA	NA	62	63	f	l	f	NaN	r	0	gb	0	0	0	0	0	0	0	0	0	0	0	NaN	9	0	0	NA	NA	NA	NA	NA	0	0	0	0	0	0	0	0	0	0	0	0	0	0	0	0
1318	DE-0232179	NA	NA	NA	57	57	m	ST	TH	NaN	l	0	gb	0	0	1	0	0	0	0	0	0	0	0	NaN	5	0	0	NA	NA	NA	NA	NA	0	0	0	0	0	0	0	0	0	0	0	0	0	0	0	0
1319	DE-0232259	NA	NA	NA	52	58	m	l	f	NaN	r	0	gb	0	0	0	0	0	0	0	0	0	0	0	NaN	6	0	0	NA	NA	NA	NA	NA	0	0	0	0	0	0	0	0	0	0	0	0	0	0	0	0
1320	DE-0232284	NA	NA	NA	50	50	m	l	t	NaN	l	0	gb	0	0	0	0	0	0	0	0	0	0	0	NaN	6	0	0	NA	NA	NA	NA	NA	0	0	0	0	0	0	0	0	0	0	0	0	0	0	0	0
1321	DE-0232291	NA	NA	NA	57	57	m	B	B	NaN	NA	0	gb	0	0	0	0	0	0	0	0	0	0	0	NaN	6	0	0	NA	NA	NA	NA	NA	0	0	0	0	0	0	0	0	0	0	0	0	0	0	0	0
1322	DE-0232346	NA	NA	NA	63	63	m	l	o	NaN	l	0	gb	0	0	1	0	0	0	0	0	0	0	0	NaN	16	0	0	NA	NA	NA	NA	NA	0	0	0	0	0	0	0	0	0	0	0	0	0	0	0	0
1323	DE-0232392	NA	NA	NA	26	27	m	l	f	NaN	r	0	gb	1	0	0	0	0	0	0	0	0	0	0	NaN	8	0	0	NA	NA	NA	NA	NA	0	0	0	0	0	0	0	0	0	0	0	0	0	0	0	0
1324	DE-0232427	NA	NA	NA	69	69	m	B	B	NaN	r	0	gb	0	0	0	0	0	0	0	0	0	0	0	NaN	9	0	0	NA	NA	NA	NA	NA	0	0	0	0	0	0	0	0	0	0	0	0	0	0	0	0
1325	DE-0232456	NA	NA	NA	51	51	f	l	p	NaN	r	0	gb	0	0	0	0	0	0	0	1	0	0	0	NaN	12	0	0	NA	NA	NA	NA	NA	0	0	0	0	0	0	0	0	0	0	0	0	0	0	0	0
1326	DE-0232531	NA	NA	NA	57	57	m	l	f	NaN	l	0	gb	0	1	0	0	0	0	0	0	0	0	0	NaN	6	0	0	NA	NA	NA	NA	NA	0	0	0	0	0	0	0	0	0	0	0	0	0	0	0	0
1327	DE-0232580	NA	NA	NA	28	28	m	ml	ft	NaN	l	0	gb	0	0	0	0	0	0	0	0	0	0	0	NaN	7	0	0	NA	NA	NA	NA	NA	0	0	0	0	0	0	0	0	0	0	0	0	0	0	0	0
1328	DE-0232586	NA	NA	NA	58	58	m	IT	CB	NaN	NA	0	gb	0	0	0	0	0	0	0	0	0	0	0	NaN	NA	NA	0	NA	NA	NA	NA	NA	0	0	0	0	0	0	0	0	0	0	0	0	0	0	0	0
1329	DE-0232711	NA	NA	NA	70	70	m	l	t	NaN	NA	0	gb	0	0	0	0	0	0	0	0	0	0	0	NaN	9	0	0	NA	NA	NA	NA	NA	0	0	0	0	0	0	0	0	0	0	0	0	0	0	0	0
1330	DE-0232757	NA	NA	NA	55	55	m	B	B	NaN	l	0	gb	0	0	0	0	0	0	0	0	0	0	0	NaN	6	0	0	NA	NA	NA	NA	NA	0	0	0	0	0	0	0	0	0	0	0	0	0	0	0	0
1331	DE-0232763	NA	NA	NA	34	35	f	l	t	NaN	l	0	gb	1	1	0	0	0	0	0	0	0	0	0	NaN	6	0	0	NA	NA	NA	NA	NA	0	0	0	0	0	0	0	0	0	0	0	0	0	0	0	0
1332	DE-0232764	NA	NA	NA	53	53	m	B	B	NaN	NA	0	gb	0	0	1	0	0	0	0	0	0	0	0	NaN	NA	NA	NA	NA	NA	NA	NA	NA	NA	NA	NA	NA	NA	NA	NA	NA	NA	NA	NA	NA	NA	NA	NA	NA
1333	DE-0232804	NA	NA	NA	70	70	f	l	t	NaN	r	0	gb	0	0	0	0	0	0	0	0	0	0	0	NaN	4	0	0	NA	NA	NA	NA	NA	0	0	0	0	0	0	0	0	0	0	0	0	0	0	0	0
1334	DE-0232812	NA	NA	NA	57	58	m	l	t	NaN	r	0	gb	0	0	0	0	0	0	0	0	0	0	0	NaN	6	0	0	NA	NA	NA	NA	NA	0	0	0	0	0	0	0	0	0	0	0	0	0	0	0	0
1335	DE-0232826	NA	NA	NA	73	75	m	l	f	NaN	r	0	gb	0	0	1	0	0	0	0	0	0	0	0	NaN	NA	NA	NA	NA	NA	NA	NA	NA	NA	NA	NA	NA	NA	NA	NA	NA	NA	NA	NA	NA	NA	NA	NA	NA
1336	DE-0232829	NA	NA	NA	42	42	f	l	t	NaN	r	0	gb	0	0	0	0	0	0	0	0	0	0	0	NaN	1	0	0	NA	NA	NA	NA	NA	0	0	0	0	0	0	0	0	0	0	0	0	0	0	0	0
1337	DE-0233052	NA	NA	NA	56	56	m	ml	fp	NaN	r	0	gb	0	0	1	0	0	0	0	0	0	0	0	NaN	6	0	0	NA	NA	NA	NA	NA	0	0	0	0	0	0	0	0	0	0	0	0	0	0	0	0
1338	DE-0233116	NA	NA	NA	69	69	f	l	o	NaN	l	0	gb	0	0	1	0	0	0	0	0	0	0	0	NaN	7	0	0	NA	NA	NA	NA	NA	0	0	0	0	0	0	0	0	0	0	0	0	0	0	0	0
1339	DE-0233117	NA	NA	NA	69	69	m	l	t	NaN	l	0	gb	0	0	0	0	0	0	0	0	0	0	0	NaN	Quality Not Sufficient	NA	NA	NA	NA	NA	NA	NA	NA	NA	NA	NA	NA	NA	NA	NA	NA	NA	NA	NA	NA	NA	NA	NA
1340	DE-0233151	NA	NA	NA	52	52	f	l	t	NaN	NA	0	gb	1	0	0	0	0	0	0	0	0	0	0	NaN	9	0	0	NA	NA	NA	NA	NA	0	0	0	0	0	0	0	0	0	0	0	0	0	0	0	0
1341	DE-0233301	NA	NA	NA	66	67	f	l	p	NaN	r	0	gb	0	0	1	0	0	0	0	0	0	0	0	NaN	8	0	0	NA	NA	NA	NA	NA	0	0	0	0	0	0	0	0	0	0	0	0	0	0	0	0
1342	DE-0233423	NA	NA	NA	47	47	f	l	f	NaN	NA	0	gb	0	0	0	0	0	0	0	0	0	0	0	NaN	5	0	0	NA	NA	NA	NA	NA	0	0	0	0	0	0	0	0	0	0	0	0	0	0	0	0
1343	DE-0233478	NA	NA	NA	44	45	f	l	p	NaN	r	0	gb	0	0	0	0	0	0	0	0	0	0	0	NaN	4	0	0	NA	NA	NA	NA	NA	0	0	0	0	0	0	0	0	0	0	0	0	0	0	0	0
1344	DE-0233550	NA	NA	NA	47	48	f	B	B	NaN	NA	0	gb	1	0	0	0	0	0	0	0	0	0	0	NaN	6	0	0	NA	NA	NA	NA	NA	0	0	0	0	0	0	0	0	0	0	0	0	0	0	0	0
1345	DE-0233596	NA	NA	NA	70	70	m	l	f	NaN	r	0	gb	1	0	0	0	0	0	0	0	0	0	0	NaN	3	0	0	NA	NA	NA	NA	NA	0	0	0	0	0	0	0	0	0	0	0	0	0	0	0	0
1346	DE-0233804	NA	NA	NA	61	61	f	l	t	NaN	r	0	gb	0	0	0	0	0	0	0	0	0	0	0	NaN	5	0	0	NA	NA	NA	NA	NA	0	0	0	0	0	0	0	0	0	0	0	0	0	0	0	0
1347	DE-0233867	NA	NA	NA	59	59	m	B	B	NaN	r	0	gb	0	0	0	0	0	0	0	0	0	0	0	NaN	NA	NA	NA	NA	NA	NA	NA	NA	NA	NA	NA	NA	NA	NA	NA	NA	NA	NA	NA	NA	NA	NA	NA	NA
1348	DE-0233928	NA	NA	NA	69	69	m	l	t	NaN	l	0	gb	0	0	1	0	0	0	0	0	0	0	0	NaN	NA	NA	NA	NA	NA	NA	NA	NA	NA	NA	NA	NA	NA	NA	NA	NA	NA	NA	NA	NA	NA	NA	NA	NA
1349	DE-0233936	NA	NA	NA	68	69	f	B	B	NaN	NA	0	gb	0	0	0	0	0	0	0	0	0	0	0	NaN	6	0	0	NA	NA	NA	NA	NA	0	0	0	0	0	0	0	0	0	0	0	0	0	0	0	0
1350	DE-0234102	NA	NA	NA	69	69	f	l	t	NaN	r	0	gb	1	0	1	0	0	0	0	0	0	0	0	NaN	8	0	0	NA	NA	NA	NA	NA	0	0	0	0	0	0	0	0	0	0	0	0	0	0	0	0
1351	DE-0234112	NA	NA	NA	65	65	f	IT	CB	NaN	r	0	gb	0	0	0	0	0	0	0	0	0	0	0	NaN	49	1	0	NA	NA	NA	NA	NA	0	0	0	0	0	0	0	0	0	0	0	0	0	0	0	0
1352	DE-0234113	NA	NA	NA	57	57	m	l	f	NaN	r	0	gb	0	0	0	0	0	0	0	0	0	0	0	NaN	5	0	0	NA	NA	NA	NA	NA	0	0	0	0	0	0	0	0	0	0	0	0	0	0	0	0
1353	DE-0234215	NA	NA	NA	71	71	m	l	t	NaN	l	0	gb	0	0	0	0	0	0	0	0	0	0	0	NaN	8	0	0	NA	NA	NA	NA	NA	0	0	0	0	0	0	0	0	0	0	0	0	0	0	0	0
1354	DE-0234620	NA	NA	NA	45	49	m	ST	PIN	NaN	c	0	gb	0	0	1	0	0	0	0	1	0	0	1	NaN	Quality Not Sufficient	NA	NA	NA	NA	NA	NA	NA	NA	NA	NA	NA	NA	NA	NA	NA	NA	NA	NA	NA	NA	NA	NA	NA
1355	DE-0234887	NA	NA	NA	56	56	m	B	B	NaN	NA	0	gb	0	0	0	0	0	0	0	0	0	0	0	NaN	7	0	0	NA	NA	NA	NA	NA	0	0	0	0	0	0	0	0	0	0	0	0	0	0	0	0
1356	DE-0234909	NA	NA	NA	70	72	m	l	o	NaN	l	0	gb	0	0	0	0	0	0	0	0	0	0	0	NaN	9	0	0	NA	NA	NA	NA	NA	0	0	0	0	0	0	0	0	0	0	0	0	0	0	0	0
1357	DE-0234967	NA	NA	NA	71	71	m	l	p	NaN	r	0	gb	0	0	0	0	0	0	0	0	0	0	0	NaN	Indeterminate	NA	NA	NA	NA	NA	NA	NA	0	0	0	0	0	0	0	0	0	0	0	0	0	0	0	0
1358	DE-0234981	NA	NA	NA	65	65	m	l	t	NaN	l	0	gb	0	0	0	0	0	0	0	0	0	0	0	NaN	6	0	0	NA	NA	NA	NA	NA	0	0	0	0	0	0	0	0	0	0	0	0	0	0	0	0
1359	DE-0235096	NA	NA	NA	47	47	m	l	f	NaN	r	0	gb	0	0	0	0	0	0	0	0	0	0	0	NaN	8	0	0	NA	NA	NA	NA	NA	0	0	0	0	0	0	0	0	0	0	0	0	0	0	0	0
1360	DE-0235129	NA	NA	NA	38	38	m	B	B	NaN	NA	0	gb	1	0	1	0	0	0	0	0	0	0	0	NaN	6	0	0	NA	NA	NA	NA	NA	0	0	0	0	0	0	0	0	0	0	0	0	0	0	0	0
1361	DE-0235362	NA	NA	NA	68	68	m	l	o	NaN	l	0	gb	0	0	0	0	0	0	0	0	0	0	0	NaN	9	0	0	NA	NA	NA	NA	NA	0	0	0	0	0	0	0	0	0	0	0	0	0	0	0	0
1362	DE-0235369	NA	NA	NA	73	73	f	l	t	NaN	r	0	gb	0	0	1	0	0	0	0	0	0	0	0	NaN	4	0	0	NA	NA	NA	NA	NA	0	0	0	0	0	0	0	0	0	0	0	0	0	0	0	0
1363	DE-0235379	NA	NA	NA	61	61	f	ST	CH	NaN	NA	0	gb	0	0	0	0	0	0	0	0	0	0	0	NaN	NA	NA	NA	NA	NA	NA	NA	NA	NA	NA	NA	NA	NA	NA	NA	NA	NA	NA	NA	NA	NA	NA	NA	NA
1364	DE-0235423	NA	NA	NA	61	61	f	l	f	NaN	r	0	gb	0	0	0	0	0	0	0	0	0	0	0	NaN	9	0	0	NA	NA	NA	NA	NA	0	0	0	0	0	0	0	0	0	0	0	0	0	0	0	0
1365	DE-0235429	NA	NA	NA	50	51	m	l	f	NaN	r	0	gb	0	0	1	0	0	0	0	0	0	0	0	NaN	NA	NA	NA	NA	NA	NA	NA	NA	NA	NA	NA	NA	NA	NA	NA	NA	NA	NA	NA	NA	NA	NA	NA	NA
1366	DE-0235431	NA	NA	NA	48	48	m	l	t	NaN	l	0	gb	0	0	0	0	0	0	0	0	0	0	0	NaN	5	0	0	NA	NA	NA	NA	NA	0	0	0	0	0	0	0	0	0	0	0	0	0	0	0	0
1367	DE-0235521	NA	NA	NA	56	56	m	l	p	NaN	l	0	gb	0	0	0	0	0	0	0	0	0	0	0	NaN	4	0	0	NA	NA	NA	NA	NA	0	0	0	0	0	0	0	0	0	0	0	0	0	0	0	0
1368	DE-0235980	NA	NA	NA	51	52	m	l	p	NaN	l	0	gb	0	0	0	0	0	0	0	0	0	0	0	NaN	9	0	0	NA	NA	NA	NA	NA	0	0	0	0	0	0	0	0	0	1	0	0	0	0	0	0
1369	DE-0236110	NA	NA	NA	62	62	m	ml	po	NaN	l	0	gb	0	0	0	0	0	0	0	0	0	0	0	NaN	6	0	0	NA	NA	NA	NA	NA	0	0	0	0	0	0	0	0	0	0	0	0	0	0	0	0
1370	DE-0236368	NA	NA	NA	41	41	f	B	B	NaN	NA	0	gb	0	0	0	0	0	0	0	0	0	0	0	NaN	66	1	0	NA	NA	NA	NA	NA	0	0	0	0	0	0	0	0	0	0	0	0	0	0	0	0
1371	DE-0236432	NA	NA	NA	56	56	m	l	f	NaN	l	0	gb	0	0	1	0	0	0	0	0	0	0	0	NaN	6	0	0	NA	NA	NA	NA	NA	0	0	0	0	0	0	0	0	0	0	0	0	0	0	0	0
1372	DE-0236437	NA	NA	NA	53	53	m	l	f	NaN	r	0	gb	0	0	0	0	0	0	0	0	0	0	0	NaN	6	0	0	NA	NA	NA	NA	NA	0	0	0	0	0	0	0	0	0	0	0	0	0	0	0	0
1373	DE-0236456	NA	NA	NA	43	43	m	l	f	NaN	r	0	gb	0	0	0	0	0	0	0	0	0	0	0	NaN	6	0	0	NA	NA	NA	NA	NA	0	0	0	0	0	0	0	0	0	0	0	0	0	0	0	0
1374	DE-0236847	NA	NA	NA	71	71	m	l	t	NaN	r	0	gb	0	0	1	0	0	0	0	0	0	0	0	NaN	4	0	0	NA	NA	NA	NA	NA	0	0	0	0	0	0	0	0	0	0	0	0	0	0	0	0
1375	DE-0236854	NA	NA	NA	45	45	m	l	p	NaN	l	0	gb	0	0	0	0	0	0	0	0	0	0	0	NaN	8	0	0	NA	NA	NA	NA	NA	0	0	0	0	0	0	0	0	0	0	0	0	0	0	0	0
1376	DE-0236887	NA	NA	NA	54	54	m	l	p	NaN	l	0	gb	0	0	0	0	0	0	0	0	0	0	0	NaN	5	0	0	NA	NA	NA	NA	NA	0	0	0	0	0	0	0	0	0	0	0	0	0	0	0	0
1377	DE-0236936	NA	NA	NA	25	26	f	SC	SC	NaN	c	0	gb	0	0	0	0	0	0	0	0	0	0	0	NaN	8	0	0	NA	NA	NA	NA	NA	0	0	0	0	0	0	0	0	0	0	0	0	0	0	0	0
1378	DE-0236999	NA	NA	NA	84	84	m	l	f	NaN	l	0	gb	0	0	0	0	0	0	0	0	0	0	0	NaN	5	0	0	NA	NA	NA	NA	NA	0	0	0	0	0	0	0	0	0	0	0	0	0	0	0	0
1379	DE-0237006	NA	NA	NA	60	61	m	l	f	NaN	l	0	gb	0	0	0	0	0	0	0	0	0	0	0	NaN	6	0	0	NA	NA	NA	NA	NA	0	0	0	0	0	0	0	0	0	0	0	0	0	0	0	0
1380	DE-0237013	NA	NA	NA	69	69	f	l	f	NaN	r	0	gb	0	0	0	0	0	0	0	0	0	0	0	NaN	9	0	0	NA	NA	NA	NA	NA	0	0	0	0	0	0	0	0	0	0	0	0	0	0	0	0
1381	DE-0237127	NA	NA	NA	78	78	m	l	f	NaN	r	0	gb	0	0	0	0	0	0	0	0	0	0	0	NaN	6	0	0	NA	NA	NA	NA	NA	0	0	0	0	0	0	0	0	0	0	0	0	0	0	0	0
1382	DE-0237266	NA	NA	NA	76	76	f	l	t	NaN	l	0	gb	0	0	0	0	0	0	0	0	0	0	0	NaN	7	0	0	NA	NA	NA	NA	NA	0	0	0	0	0	0	0	0	0	0	0	0	0	0	0	0
1383	DE-0237272	NA	NA	NA	48	48	m	B	B	NaN	NA	0	gb	0	0	1	0	0	0	0	0	0	0	0	NaN	Indeterminate	NA	NA	NA	NA	NA	NA	NA	0	0	0	0	0	0	0	0	0	0	0	0	0	0	0	0
1384	DE-0237278	NA	NA	NA	54	54	m	l	t	NaN	r	0	gb	0	0	0	0	0	0	0	0	0	0	0	NaN	11	0	0	NA	NA	NA	NA	NA	0	0	0	0	0	0	0	0	0	0	0	0	0	0	0	0
1385	DE-0237350	NA	NA	NA	57	58	m	l	p	NaN	r	0	gb	0	0	0	0	0	0	0	0	0	0	0	NaN	8	0	0	NA	NA	NA	NA	NA	0	0	0	0	0	0	0	0	0	0	0	0	0	0	0	0
1386	DE-0237580	NA	NA	NA	70	70	m	B	B	NaN	r	0	gb	0	0	0	0	0	0	0	0	0	0	0	NaN	54	1	0	NA	NA	NA	NA	NA	0	0	0	0	0	0	0	0	0	0	0	0	0	0	0	0
1387	DE-0237586	NA	NA	NA	68	68	m	l	t	NaN	l	0	gb	0	0	0	0	0	0	0	0	0	0	0	NaN	11	0	0	NA	NA	NA	NA	NA	0	0	0	0	0	0	0	0	0	0	0	0	0	0	0	0
1388	DE-0237627	NA	NA	NA	69	70	f	l	o	NaN	r	0	gb	0	0	0	0	0	0	0	0	0	0	0	NaN	5	0	0	NA	NA	NA	NA	NA	0	0	0	0	0	0	0	0	0	0	0	0	0	0	0	0
1389	DE-0237633	NA	NA	NA	73	73	f	l	B	NaN	l	0	gb	0	0	0	0	0	0	0	0	0	0	0	NaN	9	0	0	NA	NA	NA	NA	NA	0	0	0	0	0	0	0	0	0	0	0	0	0	0	0	0
1390	DE-0237646	NA	NA	NA	59	59	m	l	t	NaN	NA	0	gb	0	0	0	0	0	0	0	0	0	0	0	NaN	3	0	0	NA	NA	NA	NA	NA	0	0	0	0	0	0	0	0	0	0	0	0	0	0	0	0
1391	DE-0237672	NA	NA	NA	49	49	m	B	B	NaN	NA	0	gb	0	0	0	0	0	0	0	0	0	0	0	NaN	6	0	0	NA	NA	NA	NA	NA	0	0	0	0	0	0	0	0	0	0	0	0	0	0	0	0
1392	DE-0237689	NA	NA	NA	56	56	m	ml	to	NaN	l	0	gb	1	0	0	0	0	0	0	0	0	1	0	NaN	6	0	0	NA	NA	NA	NA	0	0	0	0	0	0	0	0	0	0	0	0	0	0	0	0	0
1393	DE-0237701	NA	NA	NA	56	56	m	l	p	NaN	l	0	gb	0	0	1	0	0	0	0	0	0	0	0	NaN	9	0	0	NA	NA	NA	NA	NA	0	0	0	0	0	0	0	0	0	0	0	0	0	0	0	0
1394	DE-0237742	NA	NA	NA	60	60	m	l	f	NaN	r	0	gb	1	0	0	0	0	0	0	0	0	0	0	NaN	7	0	0	NA	NA	NA	NA	NA	0	0	0	0	0	0	0	0	0	0	0	0	0	0	0	0
1395	DE-0237799	NA	NA	NA	69	69	f	l	f	NaN	l	0	gb	0	0	0	0	0	0	0	0	0	0	0	NaN	3	0	0	NA	NA	NA	NA	NA	0	0	0	0	0	0	0	0	0	0	0	0	0	0	0	0
1396	DE-0237810	NA	NA	NA	64	64	f	B	B	NaN	NA	0	gb	0	0	1	0	0	0	0	0	0	0	0	NaN	9	0	0	NA	NA	NA	NA	0	0	0	0	0	0	0	0	0	0	0	0	0	0	0	0	0
1397	DE-0237885	NA	NA	NA	66	66	m	ml	ft	NaN	r	0	gb	0	0	0	0	0	0	0	0	0	0	0	NaN	4	0	0	NA	NA	NA	NA	NA	0	0	0	0	0	0	0	0	0	0	0	0	0	0	0	0
1398	DE-0238859	NA	NA	NA	41	42	f	l	f	NaN	l	0	gb	0	0	0	0	0	0	0	0	0	0	0	NaN	6	0	0	NA	NA	NA	NA	NA	0	0	0	0	0	0	0	0	0	0	0	0	0	0	0	0
1399	DE-0238936	NA	NA	NA	39	39	m	l	f	NaN	r	0	gb	0	0	0	0	0	0	0	0	0	0	0	NaN	Indeterminate	NA	NA	NA	NA	NA	NA	NA	0	0	0	0	0	0	0	0	0	0	0	0	0	0	0	0
1400	DE-0238941	NA	NA	NA	63	63	m	l	f	NaN	l	0	gb	0	0	0	0	0	0	0	0	0	0	0	NaN	NA	NA	NA	NA	NA	NA	NA	NA	NA	NA	NA	NA	NA	NA	NA	NA	NA	NA	NA	NA	NA	NA	NA	NA
1401	DE-0238942	NA	NA	NA	42	43	m	l	f	NaN	l	0	gb	1	0	0	0	0	0	0	0	0	0	0	NaN	4	0	0	NA	NA	NA	NA	NA	0	0	0	0	0	0	0	0	0	0	0	0	0	0	0	0
1402	DE-0238960	NA	NA	NA	66	66	f	l	p	NaN	l	0	gb	0	0	0	0	0	0	0	0	0	0	0	NaN	6	0	0	NA	NA	NA	NA	NA	0	0	0	0	0	0	0	0	0	0	0	0	0	0	0	0
1403	DE-0238976	NA	NA	NA	60	60	f	l	f	NaN	l	1	gb	0	0	0	0	0	0	0	0	0	0	0	NaN	9	0	0	NA	NA	NA	NA	NA	0	0	0	0	0	0	0	0	0	0	0	0	0	0	0	0
1404	DE-0239018	NA	NA	NA	51	52	m	B	B	NaN	NA	0	gb	0	0	0	0	1	0	1	0	0	0	0	NaN	5	0	0	NA	NA	NA	NA	NA	0	0	0	0	0	0	0	0	0	0	0	0	0	0	0	0
1405	DE-0239030	NA	NA	NA	49	49	f	l	f	NaN	b	0	gb	0	0	1	0	0	0	0	0	0	0	0	NaN	9	0	0	NA	NA	NA	NA	NA	NA	NA	NA	NA	NA	NA	NA	NA	NA	NA	NA	NA	NA	NA	NA	NA
1406	DE-0239105	NA	NA	NA	32	33	f	B	B	NaN	NA	0	gb	0	0	1	0	0	0	0	0	0	0	0	maybe glioma grade 3	6	0	0	NA	NA	NA	NA	NA	0	0	0	0	0	0	0	0	0	0	0	0	0	0	0	0
1407	DE-0239109	NA	NA	NA	54	54	m	l	p	NaN	r	0	gb	0	0	0	0	0	0	0	0	0	0	0	NaN	80	1	0	NA	NA	NA	NA	NA	0	0	0	0	0	0	0	0	0	0	0	0	0	0	0	0
1408	DE-0239165	NA	NA	NA	68	68	m	l	f	NaN	r	0	gb	0	0	0	0	0	0	0	0	0	0	0	NaN	5	0	0	NA	NA	NA	NA	NA	0	0	0	0	0	0	0	0	0	0	0	0	0	0	0	0
1409	DE-0239202	NA	NA	NA	36	40	m	l	f	NaN	NA	0	gb	0	0	0	0	0	0	0	0	0	0	0	NaN	7	0	0	NA	NA	NA	NA	NA	0	0	0	0	0	0	0	0	0	0	0	0	0	0	0	0
1410	DE-0239219	NA	NA	NA	71	71	m	l	p	NaN	r	0	gb	0	0	1	0	0	0	0	0	0	0	0	NaN	6	0	0	NA	NA	NA	NA	NA	0	0	0	0	0	0	0	0	0	0	0	0	0	0	0	0
1411	DE-0239262	NA	NA	NA	39	39	m	B	B	NaN	NA	0	gb	0	0	0	0	0	0	0	0	1	0	0	NaN	11	0	0	NA	NA	NA	NA	NA	0	0	0	0	0	0	0	0	0	0	0	0	0	0	0	0
1412	DE-0239652	NA	NA	NA	67	67	f	B	B	NaN	NA	0	gb	0	0	0	0	0	0	0	0	0	0	0	NaN	6	0	0	NA	NA	NA	NA	NA	0	0	0	0	0	0	0	0	0	0	0	0	0	0	0	0
1413	DE-0239680	NA	NA	NA	60	60	m	l	f	NaN	r	0	gb	0	0	0	0	0	0	0	0	0	0	0	NaN	6	0	0	NA	NA	NA	NA	NA	0	0	0	0	0	0	0	0	0	0	0	0	0	0	0	0
1414	DE-0239779	NA	NA	NA	61	62	m	l	o	NaN	l	0	gb	0	0	0	0	0	0	0	0	0	0	0	NaN	3	0	0	NA	NA	NA	NA	NA	0	0	0	0	0	0	0	0	0	0	0	0	0	0	0	0
1415	DE-0239798	NA	NA	NA	39	39	m	l	t	NaN	r	0	gb	0	0	0	0	0	0	0	0	0	0	0	NaN	6	0	0	NA	NA	NA	NA	NA	0	0	0	0	0	0	0	0	0	0	0	0	0	0	0	0
1416	DE-0239812	NA	NA	NA	32	32	m	l	o	NaN	r	0	gb	0	0	0	0	0	0	0	1	0	0	0	NaN	4	0	0	NA	NA	NA	NA	NA	0	0	0	0	0	0	0	0	0	0	0	0	0	0	0	0
1417	DE-0239890	NA	NA	NA	61	61	m	l	t	NaN	NA	0	gb	0	0	0	0	0	0	0	0	0	0	0	NaN	6	0	0	NA	NA	NA	NA	NA	0	0	0	0	0	0	0	0	0	0	0	0	0	0	0	0
1418	DE-0239979	NA	NA	NA	45	45	m	l	f	NaN	l	0	gb	0	0	0	0	0	0	0	0	0	0	0	NaN	4	0	0	NA	NA	NA	NA	NA	0	0	0	0	0	0	0	0	0	0	0	0	0	0	0	0
1419	DE-0240459	NA	NA	NA	72	72	m	l	t	NaN	l	0	gb	0	0	0	0	0	0	0	0	0	0	0	NaN	6	0	0	NA	NA	NA	NA	NA	0	0	0	0	0	0	0	0	0	0	0	0	0	0	0	0
1420	DE-0240531	NA	NA	NA	68	68	m	B	B	NaN	NA	0	gb	0	0	0	0	0	0	0	0	1	0	0	NaN	12	0	0	NA	NA	NA	NA	NA	0	0	0	0	0	0	0	0	0	0	0	0	0	0	0	0
1421	DE-0240730	NA	NA	NA	40	41	m	l	p	NaN	l	0	gb	0	0	0	0	0	0	0	0	0	0	0	NaN	5	0	0	NA	NA	NA	NA	NA	0	0	0	0	0	0	0	0	0	0	0	0	0	0	0	0
1422	DE-0240986	NA	NA	NA	57	57	m	l	f	NaN	l	0	gb	0	0	0	0	0	0	0	0	0	0	0	NaN	6	0	0	NA	NA	NA	NA	NA	0	0	0	0	0	0	0	0	0	0	0	0	0	0	0	0
1423	DE-0241001	NA	NA	NA	41	42	f	l	p	NaN	l	0	gb	0	0	0	0	0	0	0	0	0	0	0	NaN	9	0	0	NA	NA	NA	NA	NA	0	0	0	0	0	0	0	0	0	0	0	0	0	0	0	0
1424	DE-0241152	NA	NA	NA	67	67	f	l	f	NaN	r	0	gb	1	0	0	0	0	0	0	0	0	0	0	NaN	7	0	0	NA	NA	NA	NA	NA	0	0	0	0	0	0	0	0	0	0	0	0	0	0	0	0
1425	DE-0241194	NA	NA	NA	89	89	f	l	t	NaN	l	0	gb	0	0	0	0	0	0	0	0	0	0	0	NaN	8	0	0	NA	NA	NA	NA	NA	0	0	0	0	0	0	0	0	0	0	0	0	0	0	0	0
1426	DE-0241601	NA	NA	NA	52	52	m	l	t	NaN	l	0	gb	0	0	0	0	0	0	0	0	0	0	0	NaN	9	0	0	NA	NA	NA	NA	NA	0	0	0	0	0	0	0	0	0	0	0	0	0	0	0	0
1427	DE-0241644	NA	NA	NA	41	41	m	l	f	NaN	r	0	gb	1	0	0	0	0	0	0	0	0	1	0	NaN	9	0	0	NA	NA	NA	NA	NA	0	0	0	0	0	0	0	0	0	0	0	0	0	0	0	0
1428	DE-0241719	NA	NA	NA	55	55	m	l	t	NaN	r	0	gb	0	0	0	0	0	0	0	0	0	0	0	NaN	6	0	0	NA	NA	NA	NA	NA	0	0	0	0	0	0	0	0	0	0	0	0	0	0	0	0
1429	DE-0241780	NA	NA	NA	35	35	m	l	f	NaN	NA	0	gb	0	0	0	0	0	0	0	0	0	0	0	NaN	16	0	0	NA	NA	NA	NA	NA	0	0	0	0	0	0	0	0	0	0	0	0	0	0	0	0
1430	DE-0241860	NA	NA	NA	29	29	m	l	t	NaN	l	0	gb	0	0	0	0	0	0	0	0	0	0	0	NaN	11	0	0	NA	NA	NA	NA	NA	0	0	0	0	0	0	0	0	0	0	0	0	0	0	0	0
1431	DE-0241898	NA	NA	NA	65	65	m	l	t	NaN	l	0	gb	0	0	0	0	0	0	0	0	0	0	0	NaN	10	0	0	NA	NA	NA	NA	NA	0	0	0	0	0	0	0	0	0	0	0	0	0	0	0	0
1432	DE-0242031	NA	NA	NA	62	62	m	l	t	NaN	r	0	gb	1	0	0	0	0	0	0	0	0	0	0	NaN	9	0	0	NA	NA	NA	NA	NA	0	0	0	0	0	0	0	0	0	0	0	0	0	0	0	0
1433	DE-0242305	NA	NA	NA	54	54	f	ml	po	NaN	r	0	gb	1	0	0	0	0	0	0	0	0	0	0	NaN	7	0	0	NA	NA	NA	NA	NA	0	0	0	0	0	0	0	0	0	0	0	0	0	0	0	0
1434	DE-0242397	NA	NA	NA	69	69	m	l	t	NaN	l	0	gb	0	0	0	0	0	0	0	0	0	0	0	NaN	4	0	0	NA	NA	NA	NA	NA	0	0	0	0	0	0	0	0	0	0	0	0	0	0	0	0
1435	DE-0242402	NA	NA	NA	70	70	m	l	f	NaN	l	0	gb	0	0	0	0	0	0	0	0	0	0	0	NaN	18	1	0	NA	NA	NA	NA	NA	0	0	0	0	0	0	0	0	0	0	0	0	0	0	0	0
1436	DE-0242411	NA	NA	NA	67	67	m	l	f	NaN	l	0	gb	0	0	0	0	0	0	0	0	0	0	0	NaN	5	0	0	NA	NA	NA	NA	NA	0	0	0	0	0	0	0	0	0	0	0	0	0	0	0	0
1437	DE-0242591	NA	NA	NA	56	56	m	ST	TH	NaN	c	0	gb	0	0	1	0	0	0	0	0	0	0	0	NaN	5	0	0	NA	NA	NA	NA	NA	0	0	0	0	0	0	0	0	0	0	0	0	0	0	0	0
1438	DE-0242663	NA	NA	NA	66	66	m	l	f	NaN	r	0	gb	0	0	1	0	0	0	0	0	0	0	0	NaN	7	0	0	NA	NA	NA	NA	NA	0	0	0	0	0	0	0	0	0	0	0	0	0	0	0	0
1439	DE-0242827	NA	NA	NA	21	21	f	IT	BS	NaN	NA	0	gb	0	0	1	0	0	0	0	0	0	0	0	NaN	9	0	0	NA	NA	NA	NA	NA	0	0	0	0	0	0	0	0	0	0	0	0	0	0	0	0
1440	DE-0242833	NA	NA	NA	41	41	f	l	f	NaN	l	0	gb	0	0	0	0	0	0	0	0	0	0	0	NaN	106	1	1	NA	NA	NA	NA	NA	0	0	0	0	0	0	0	0	0	0	0	0	0	0	0	0
1441	DE-0242860	NA	NA	NA	55	55	m	l	t	NaN	l	0	gb	0	0	0	0	0	0	0	0	0	0	0	NaN	6	0	0	NA	NA	NA	NA	NA	NA	NA	NA	NA	NA	NA	NA	NA	NA	NA	NA	NA	NA	NA	NA	NA
1442	DE-0242896	NA	NA	NA	49	49	m	l	p	NaN	l	0	gb	0	0	0	0	0	0	0	0	0	0	0	NaN	9	0	0	NA	NA	NA	NA	NA	0	0	0	0	0	0	0	0	0	0	0	0	0	0	0	0
1443	DE-0242904	NA	NA	NA	51	51	m	B	B	NaN	NA	0	gb	0	0	0	0	0	0	0	0	0	0	0	NaN	6	0	0	NA	NA	NA	NA	NA	0	0	0	0	0	0	0	0	0	0	0	0	0	0	0	0
1444	DE-0242907	NA	NA	NA	58	59	f	B	B	NaN	NA	0	gb	0	0	0	0	0	0	0	0	0	0	0	NaN	6	0	0	NA	NA	NA	NA	NA	0	0	0	0	0	0	0	0	0	0	0	0	0	0	0	0
1445	DE-0242910	NA	NA	NA	69	69	m	l	t	NaN	l	0	gb	0	0	0	0	0	0	0	0	0	0	0	NaN	9	0	0	NA	NA	NA	NA	NA	0	0	0	0	0	0	0	0	0	0	0	0	0	0	0	0
1446	DE-0243086	NA	NA	NA	37	38	f	B	B	NaN	NA	0	gb	0	0	0	0	0	0	0	0	0	0	0	NaN	6	0	0	NA	NA	NA	NA	NA	0	0	0	0	0	0	0	0	0	0	0	0	0	0	0	0
1447	DE-0243261	NA	NA	NA	55	55	m	l	p	NaN	r	0	gb	0	0	0	0	0	0	0	0	0	0	0	NaN	3	0	0	NA	NA	NA	NA	NA	0	0	0	0	0	0	0	0	0	0	0	0	0	0	0	0
1448	DE-0243298	NA	NA	NA	56	56	m	l	t	NaN	l	0	gb	0	0	0	0	0	0	0	0	0	0	0	NaN	6	0	0	NA	NA	NA	NA	NA	0	0	0	0	0	0	0	0	0	0	0	0	0	0	0	0
1449	DE-0243354	NA	NA	NA	62	62	m	l	p	NaN	r	0	gb	0	0	0	0	0	0	0	0	0	0	0	NaN	6	0	0	NA	NA	NA	NA	NA	0	0	0	0	0	0	0	0	0	0	0	0	0	0	0	0
1450	DE-0243357	NA	NA	NA	49	49	f	ml	po	NaN	r	0	gb	0	0	0	0	0	0	0	0	0	0	0	NaN	5	0	0	NA	NA	NA	NA	NA	0	0	0	0	0	0	0	0	0	0	0	0	0	0	0	0
1451	DE-0243393	NA	NA	NA	76	76	m	l	p	NaN	r	0	gb	0	0	0	0	0	0	0	0	0	0	0	NaN	NA	NA	NA	NA	NA	NA	NA	NA	NA	NA	NA	NA	NA	NA	NA	NA	NA	NA	NA	NA	NA	NA	NA	NA
1452	DE-0243403	NA	NA	NA	74	75	f	l	t	NaN	l	0	gb	0	0	0	0	0	0	0	0	0	0	0	NaN	NA	NA	NA	NA	NA	NA	NA	NA	0	0	0	0	0	0	0	0	0	0	0	0	0	0	0	0
1453	DE-0243404	NA	NA	NA	57	58	f	l	t	NaN	l	0	gb	0	0	0	0	0	0	0	0	0	0	0	NaN	6	0	0	NA	NA	NA	NA	NA	0	0	0	0	0	0	0	0	0	0	0	0	0	0	0	0
1454	DE-0243432	NA	NA	NA	51	53	m	l	o	NaN	l	0	gb	0	0	0	0	0	0	0	0	0	0	0	NaN	4	0	0	NA	NA	NA	NA	NA	0	0	0	0	0	0	0	0	0	0	0	0	0	0	0	0
1455	DE-0243440	NA	NA	NA	82	83	m	l	t	NaN	l	0	gb	0	0	0	0	0	0	0	0	0	0	0	NaN	10	0	0	NA	NA	NA	NA	NA	0	0	0	0	0	0	0	0	0	0	0	0	0	0	0	0
1456	DE-0243593	NA	NA	NA	68	68	m	l	f	NaN	r	0	gb	0	0	0	0	0	0	0	0	0	0	0	NaN	4	0	0	NA	NA	NA	NA	NA	0	0	0	0	0	0	0	0	0	0	0	0	0	0	0	0
1457	DE-0244584	NA	NA	NA	45	45	m	l	t	NaN	l	0	gb	0	0	0	0	0	0	0	0	0	0	0	NaN	NA	NA	NA	NA	NA	NA	NA	NA	NA	NA	NA	NA	NA	NA	NA	NA	NA	NA	NA	NA	NA	NA	NA	NA
1458	DE-0244612	NA	NA	NA	58	58	f	l	f	NaN	r	0	gb	0	0	0	0	0	0	0	0	0	0	0	NaN	6	0	0	NA	NA	NA	NA	NA	0	0	0	0	0	0	0	0	0	0	0	0	0	0	0	0
1459	DE-0244719	NA	NA	NA	63	64	f	l	t	NaN	l	0	gb	1	0	0	0	0	0	0	0	0	0	0	NaN	78	1	0	NA	NA	NA	NA	NA	0	0	0	0	0	0	0	0	0	0	0	0	0	0	0	0
1460	DE-0244809	NA	NA	NA	55	56	f	l	f	NaN	r	0	gb	0	0	1	0	0	0	0	0	0	0	0	NaN	5	0	0	NA	NA	NA	NA	NA	0	0	0	0	0	0	0	0	0	0	0	0	0	0	0	0
1461	DE-0244839	NA	NA	NA	67	67	f	l	p	NaN	l	0	gb	0	0	0	0	0	0	0	0	0	0	0	NaN	7	0	0	NA	NA	NA	NA	NA	0	0	0	0	0	0	0	0	0	0	0	0	0	0	0	0
1462	DE-0244940	NA	NA	NA	43	43	m	l	p	NaN	NA	0	gb	1	0	0	0	0	0	0	0	0	1	0	NaN	NA	NA	NA	NA	NA	NA	NA	NA	0	0	0	0	0	0	0	0	0	0	0	0	0	0	0	0
1463	DE-0245015	NA	NA	NA	59	67	m	l	f	NaN	NA	0	gb	0	0	0	0	0	0	0	0	0	0	0	NaN	5	0	0	NA	NA	NA	NA	NA	0	0	0	0	0	0	0	0	0	0	0	0	0	0	0	0
1464	DE-0245147	NA	NA	NA	62	62	m	l	t	NaN	l	0	gb	0	0	0	0	0	0	0	0	0	0	0	NaN	9	0	0	NA	NA	NA	NA	NA	0	0	0	0	0	0	0	0	0	0	0	0	0	0	0	0
1465	DE-0245310	NA	NA	NA	65	65	m	ml	ft	NaN	r	0	gb	0	0	0	0	0	0	0	0	0	0	0	NaN	3	0	0	NA	NA	NA	NA	NA	0	0	0	0	0	0	0	0	0	0	0	1	0	0	0	0
1466	DE-0245443	NA	NA	NA	58	58	f	B	B	NaN	NA	0	gb	0	0	1	0	0	0	0	0	0	0	0	NaN	10	0	0	NA	NA	NA	NA	NA	0	0	0	0	0	0	0	0	0	0	0	0	0	0	0	0
1467	DE-0245480	NA	NA	NA	44	48	m	B	B	NaN	l	0	gb	0	0	0	0	0	0	0	0	0	0	0	NaN	NA	NA	NA	NA	NA	NA	NA	NA	0	0	0	0	0	0	0	0	0	0	0	0	0	0	0	0
1468	DE-0245540	NA	NA	NA	55	55	m	l	p	NaN	r	0	gb	0	1	0	0	0	0	0	0	0	0	0	NaN	5	0	0	NA	NA	NA	NA	NA	0	0	0	0	0	0	0	0	0	0	0	0	0	0	0	0
1469	DE-0245793	NA	NA	NA	60	60	m	ml	tp	NaN	r	0	gb	0	0	0	0	0	0	0	0	0	0	0	NaN	4	0	0	NA	NA	NA	NA	NA	0	0	0	0	0	0	0	0	0	0	0	0	0	0	0	0
1470	DE-0245815	NA	NA	NA	56	56	m	l	t	NaN	r	0	gb	0	0	0	0	0	0	0	0	0	0	0	NaN	6	0	0	NA	NA	NA	NA	NA	0	0	0	0	0	0	0	0	0	0	0	0	0	0	0	0
1471	DE-0245859	NA	NA	NA	69	70	m	l	t	NaN	NA	0	gb	0	0	0	0	0	0	0	0	0	0	0	NaN	8	0	0	NA	NA	NA	NA	NA	0	0	0	0	0	0	0	0	0	0	0	0	0	0	0	0
1472	DE-0245863	NA	NA	NA	73	73	f	l	f	NaN	r	0	gb	0	0	0	0	0	0	0	0	0	0	0	NaN	6	0	0	NA	NA	NA	NA	NA	0	0	0	0	0	0	0	0	0	0	0	0	0	0	0	0
1473	DE-0245925	NA	NA	NA	30	30	f	IT	CB	NaN	NA	0	gb	1	0	0	0	0	0	0	0	0	0	0	NaN	11	0	0	NA	NA	NA	NA	NA	0	0	0	0	0	0	0	0	0	0	0	0	0	0	0	0
1474	DE-0246095	NA	NA	NA	48	48	f	l	o	NaN	l	0	gb	1	0	0	0	0	0	0	0	0	0	0	NaN	3	0	0	NA	NA	NA	NA	NA	0	0	0	0	0	0	0	0	0	0	0	0	0	0	0	0
1475	DE-0246393	NA	NA	NA	73	73	f	l	f	NaN	r	0	gb	0	0	0	0	0	0	0	0	0	0	0	NaN	6	0	0	NA	NA	NA	NA	NA	0	0	0	0	0	0	0	0	0	0	0	0	0	0	0	0
1476	DE-0246494	NA	NA	NA	39	40	m	l	t	NaN	NA	0	gb	1	0	0	0	0	0	0	0	0	1	0	NaN	4	0	0	NA	NA	NA	NA	NA	0	0	0	0	0	0	0	0	0	0	0	0	0	0	0	0
1477	DE-0246538	NA	NA	NA	75	75	m	l	t	NaN	l	0	gb	0	0	0	0	0	0	0	0	0	0	0	NaN	7	0	0	NA	NA	NA	NA	NA	0	0	0	0	0	0	0	0	0	0	0	0	0	0	0	0
1478	DE-0246716	NA	NA	NA	27	27	f	l	f	NaN	l	0	gb	0	0	0	0	0	0	0	0	0	0	0	NaN	4	0	0	NA	NA	NA	NA	NA	0	0	0	0	0	0	0	0	0	0	0	0	0	0	0	0
1479	DE-0246748	NA	NA	NA	69	68	f	l	p	NaN	r	0	gb	0	0	0	0	0	0	0	0	0	0	0	NaN	4	0	0	NA	NA	NA	NA	NA	0	0	0	0	0	0	0	0	0	0	0	0	0	0	0	0
1480	DE-0246841	NA	NA	NA	46	46	m	l	f	NaN	NA	0	gb	0	0	0	0	0	0	0	0	0	0	0	NaN	5	0	0	NA	NA	NA	NA	NA	0	0	0	0	0	0	0	0	0	0	0	0	0	0	0	0
1481	DE-0246874	NA	NA	NA	60	60	m	l	f	NaN	r	0	gb	0	0	0	0	0	0	0	0	0	0	0	NaN	6	0	0	NA	NA	NA	NA	NA	0	0	0	0	0	0	0	0	0	0	0	0	0	0	0	0
1482	DE-0246940	NA	NA	NA	47	48	f	l	f	NaN	NA	0	gb	0	0	0	0	0	0	0	0	0	0	0	NaN	9	0	0	NA	NA	NA	NA	NA	0	0	0	0	0	0	0	0	0	0	0	0	0	0	0	0
1483	DE-0247323	NA	NA	NA	44	45	m	l	t	NaN	r	0	gb	0	0	0	0	0	0	0	0	0	0	0	NaN	6	0	0	NA	NA	NA	NA	NA	0	0	0	0	0	0	0	0	0	0	0	0	0	0	0	0
1484	DE-0247536	NA	NA	NA	51	52	m	l	p	NaN	l	0	gb	0	0	0	0	0	0	0	0	0	0	0	NaN	6	0	0	NA	NA	NA	NA	NA	0	0	0	0	0	0	0	0	0	0	0	0	0	0	0	0
1485	DE-0247665	NA	NA	NA	63	63	m	l	p	NaN	r	0	gb	1	0	0	0	0	0	0	0	0	1	0	NaN	8	0	0	NA	NA	NA	NA	NA	0	0	0	0	0	0	0	0	0	0	0	0	0	0	0	0
1486	DE-0247696	NA	NA	NA	69	69	m	l	t	NaN	r	0	gb	0	0	1	0	0	0	0	0	0	0	0	NaN	5	0	0	NA	NA	NA	NA	NA	0	0	0	0	0	0	0	0	0	0	0	0	0	0	0	0
1487	DE-0247722	NA	NA	NA	80	80	f	l	f	NaN	l	0	gb	0	0	1	0	0	0	0	0	0	0	0	NaN	4	0	0	NA	NA	NA	NA	NA	0	0	0	0	0	0	0	0	0	0	0	0	0	0	0	0
1488	DE-0247783	NA	NA	NA	58	59	f	l	t	NaN	l	0	gb	0	0	0	0	0	0	0	0	0	0	0	NaN	4	0	0	NA	NA	NA	NA	NA	0	0	0	0	0	0	0	0	0	0	0	0	0	0	0	0
1489	DE-0247805	NA	NA	NA	31	32	f	l	f	NaN	r	0	gb	0	0	0	0	0	0	0	0	0	0	0	NaN	6	0	0	NA	NA	NA	NA	NA	0	0	0	0	0	0	0	0	0	0	0	0	0	0	0	0
1490	DE-0248023	NA	NA	NA	57	58	m	l	f	NaN	l	0	gb	0	0	0	0	0	0	0	0	0	0	0	NaN	NA	NA	NA	NA	NA	NA	NA	NA	NA	NA	NA	NA	NA	NA	NA	NA	NA	NA	NA	NA	NA	NA	NA	NA
1491	DE-0248158	NA	NA	NA	37	37	f	l	f	NaN	r	0	gb	0	0	0	0	0	0	0	0	0	0	0	NaN	56	1	0	NA	NA	NA	NA	NA	0	0	0	0	0	0	0	0	0	0	0	0	0	0	0	0
1492	DE-0248162	NA	NA	NA	76	76	m	l	t	NaN	l	0	gb	0	0	0	0	0	0	0	0	0	0	0	NaN	7	0	0	NA	NA	NA	NA	NA	0	0	0	0	0	0	0	0	0	0	0	0	0	0	0	0
1493	DE-0248302	NA	NA	NA	63	64	f	l	f	NaN	r	0	gb	0	0	0	0	0	0	0	0	0	0	0	NaN	4	0	0	NA	NA	NA	NA	NA	0	0	0	0	0	0	0	0	0	0	0	0	0	0	0	0
[truncated: 974 more columns]

## Sheet: key1
column	full-name	values	values-meaning
		NA	not available
		NaN	not a number (not applicable)
			quality not sufficient
			or result = indeterminate
id	identifier
deId	deidentified ID
DEMOGRAPHICS
year	year pathology sample reported
inst	institution	jef	Jefferson University Hospitals
			Philadelphia, PA
		ucsd	University of California, San Diego Medical Center
			San Diego, CA
		scr	Scripps Memorial Hospital, La Jolla
			San Diego, CA
		irv	UC Irvine MedicalCenter
			Irvine, CA
		sjh	St. Joseph's Hospital and Medical Center
			(Barrow Neurological Institute)
			Phoenix, AZ
		bay	Baylor University Medical Center
			Dallas, TX
		prov	Providence Sacred Heart Medical Center
			Spokane, WA
		cap	Capital Health Regional Medical Center
			Trenton, NJ
		cyp	North Cypress Medical Center
			Cypress, TX
		meth	The Methodist Hospital
			Houston, TX
		west	Northern Westchester Hospital
			Westchester, NY
		luke	Saint Lukes Episcopal Health System
			Houston, TX
		msl	Methodist Sugar Land Hospital
			Sugar Land, TX
		tex	Texas Health Presbyterian Hospital
			Dallas, TX
		yale	Yale New Haven Hospital
			New Haven, CT
		lan	Lankenua Medical Center
			Wynnewood, PA
		kar	Karmanos Cancer Center
			Detroit, MI
		harp	Harper University Hospital
			Detroit, MI
		sam	Good Samaritan Hospital
			West Islip, NY
		ced	Cedars Sinai Medical Center
			Los Angeles, CA
		wash	Washington Medical Center
			Seattle, WA
		geis	Geisinger Medical Center
			Danville, PA
		froed	Froedtert Hospital and Medical College of Wisconsin
			Milwaukee, WI
		scot	Scottsdale Medical Center
			Scottsdale AZ
		sharp	Sharp Chula Vista Medical Center
			Chula Vista, CA
		ua	University of Arizona Medical Center
			Tucson, AZ
		caro	Carolinas Medical Center
			Charlotte, NC
		nw	Northwest Community Hospital
			Arlington Heights, IL
		penn	Penn State Medical Center
			Hershey, PA
		imm	Immanuel Medical Center
			Omaha, NE
		falls	Pathology Associates of Idaho Falls
			Idaho Falls, ID
		gt	Georgetown University Hospital
			Washington, DC
		wjef	West Jefferson Medical Center
			Marrero, LA
		pin	Pinnacle Health System
			Harrisburg, PA
		mort	Morton Plant Hospital
			Clearwater, FL
		cam	El Camino Hospital
			Mountain View, CA
		muir	John Muir Health
			Concord, CA
		arl	Texas Health Arlington Memorial Hospital
			Arlington, TX
		sb	Santa Barbara Cottage Hospital
			Santa Barbara, CA
		cop	Central Oregon Pathology Consultants
			Bend, OR
		ns	North Shore University Hospital
			Manhasset, NY
		plano	Medical Center of Plano
			Plano, TX
		nyu	New York University Hospitals Center
			Manhattan, NY
		holy	Geisinger Holy Spirit Hospital
			Camp Hill, PA
		apmc	Agency Provided Medical Care
			Shreveport, LA
		sinai	Mount Sinai Medical Center
			Miami Beach, FL
		fh	Florida Hospital
			Orlando, FL
		lima	Lima Pathology Associates
			Lima, OH
		upmc	University of Pittsburgh Medical Center, Presbyterian
			Pittsburgh, PA
		rml	Regional Medical Laboratory
			Tulsa, OK
		theda	ThedaCare Laboratories
			Neenah, WI
		ana	Kaiser Permanente Orange County Medical Center
			Anaheim, CA
		arl	Texas Health Arlington Memorial Hospital
			Arlington, TX
		sal	Salina Regional Health Center
			Salina, KS
		mskcc	Memorial Sloan Kettering Cancer Center
			Manhattan, NY
		eis	Eisenhower Health
			Rancho Mirage, CA
		lamc	Los Angeles Medical Center
			Los Angeles, CA
		palo	Palomar Medical Center
			Escondido, CA
		well	Wellspan Lab Services
			York, PA
		stan	Stanford University Medical Center
			Palo Alto, CA
		cp	Clin Path Diagnostics LLC
			Tempe, AZ
		hous	Houston Methodist Hospital
			Houston, TX
		roper	Roper St. Francis Healthcare
			Charleston, SC
		spec	Spectrum Health
			Grand Rapids, MI
		nit	Mount Nittany Medical Center
			State College, PA
		gulf	Gulf Coast Medical Center
			Panama City, FL
		gros	Sharp Grossmont Hospital
			La Mesa, CA
		msj	Ministry Saint Joseph's Hospital
			Marshfield, WI
		vv	Valley View Hospital
			Glenwood Springs, CO
		fran	St. Francis Hospital
		cc	Cleveland Clinic
			Cleveland, OH
		shh	Southern Hills Hospital and Medical Center
			Las Vegas, NV
		phmc	Providence Hospital and Medical Centers
			Southfield, MI
		sv	Sierra Vista Regional Medical Center
			San Luis Obispo, CA
		sjr	St. Joseph's Regional Medical Center
			Paterson, NJ
		bhl	Baptist Health Louisville
			Louisville, KY
		vand	Vanderbilt University Medical Center
			Nashville, TN
		shand	University of Florida Health Shands Cancer Hospital
			Gainesville, FL
		oak	Oakwood Southshore Medical Center
			Trenton, MI
		chi	Catholic Health Initiatives St. Vincent
			Little Rock, AR
		emc	Einstein Medical Center
			Philadelphia, PA
		smh	Sharp Memorial Hospital
			San Diego, CA
		fhmc	Florida Hospital Medical Center
			Orlando, FL
		river	Riverside University Health System Medical Center
			Moreno Valley, CA
		shore	Shore Regional Health Pathology Laboratory
			Easton, MD
		lee	Lee Memorial Hospital
			Fort Myers, FL
		ocala	Ocala Regional Medical Center
			Ocala, FL
		cfpa	Central Florida Pathology Associates
			Orlando, FL
		chi	CHI St. Luke's Health-Baylor St. Luke's Medical Center
			Houston, TX
state	state (in USA) where pathology reported		two-letter abbeviation
age	age (at collection date)		years
ageR	age - reported		years
gen	gender	m	male
		f	female
SITE
s1	site - main	B	brain
	taken from pathology report if possible	l	lobar
		ml	multi-lobar
			i.e. >= 2 lobes
		ST	supra-tentorial
		IT	infra-tentorial
		SC	spinal cord
		NNS	non nervous-system
s2	site - detailed	ST	supra-tentorial
	taken from pathology report if possible	CH	cerebral hemisphere
			includes:
			cerebrum
			cerebral cortex
		f	frontal
		t	temporal
		ft	fronto-temporal
		p	parietal
		fp	fronto-parietal
		tp	tempero-parietal
		ftp	fronto-tempero-parietal
			includes Sylvian fissure
		o	occipital
		to	tempero-occipital
		po	parieto-occipital
		tpo	tempero-parieto-occipital
		DWM	deep white matter
		sCort	subcortical
		PIN	pineal
		CC	corpus callosum
		THP	thalamus and parietal lobe
		THMB	thalamus and midbrain
		TH	thalamus
		BG	basal ganglia
		BGT	basal ganglia and temporal
		IT	infra-tentorial
			includes:
			posterior fossa
		BS	brainstem
		4V	4th ventricle
		CB	cerebellum
		B	brain
		IV	intra-ventricular
		PV	peri-ventricular
		SC	spinal cord
		C	cervial
		L	lumbar
		T	thoracic
		N	neck
		PL	pleura
		subCut	subcutaneous
s3	site - extra	LN	lymph node
		idem	intradural, extramedullary
		rt	right temporal, subcutaneous tissue
lat	laterality	l	left
		r	right
		b	bilateral
		c	central
		NA	not available
HISTOLOGY
gs	gliosarcoma?	0	no i.e. glioblastoma
		1	yes
lin	lineage	gb	glioblastoma
		lgg	low-grade glioma
rec	recurrent or residual?	0	no
		1	yes
nec	necrosis reported?	0	no
		1	yes
bx	biopsy-only?	0	no
	includes excisional biopsy	1	yes
	but not "excision and biopsy"
od	oligodendroglial features?	0	no
		1	yes
gc	giant cell?	0	no
		1	yes
hem	intratumoral hemmorhage?	0	no
		1	yes
ep	epithelioid?	0	no
		1	yes
gem	gemistocytic?	0	no
		1	yes
sc	small-cell?	0	no
		1	yes
te	treatment effect?	0	no
		1	yes
fib	fibrillary?	0	no
		1	yes
pOF	pathology - other features
MOLECULAR TESTS
tmb	tumor mutational burden		mutations/ MB
	aka tumor mutational load		1 MB = 1 million base pairs
	via somatic nonsynonymous missense mutations
htmb	high tumor mutational burden
	i.e. >=17 mutations/MB
msi	microsatellite instability
	via NGS
Key to column name suffixes
-ci	chromogenic in situ hybridization
-c	copy number amplification
-fa	fragment analysis
-fi	FISH (fluorescence in-situ hybridization)
-fv	fusion variant
-f	fusion via RNA sequencing (ArcherDx Fusionplex)
-ffa	fusion or fragment analysis
-hs	H score (immunohistochemistry score)
-i	immunohistochemistry
-n	next generation sequencing
-ps	pyrosequencing
-r	restriction fragment length polymorphism
-s	Sanger sequencing
List of tests
cMET
EGFR
Her2
MDM2
TOP2A
43352
ABL2
ACSL3
ACSL6
ADGRA2
AFDN
AFF1
AFF3
AFF4
AKAP9
AKT2
AKT3
ALDH2
ALK
APC
ARFRP1
ARHGAP26
ARHGEF12
ARID1A
ARID2
ARNT
ASPSCR1
ASXL1
ATF1
ATIC
ATM
ATP1A1
ATR
AURKA
AURKB
AXIN1
AXL
BAP1
BARD1
BCL10
BCL11A
BCL2L11
BCL3
BCL6
BCL7A
BCL9
BCR
BIRC3
BLM
BMPR1A
BRAF
BRCA1
BRCA2
BRIP1
BUB1B
CACNA1D
CALR
CAMTA1
CANT1
CARD11
CARS
CASP8
CBFA2T3
CBFB
CBL
CBLB
CCDC6
CCNB1IP1
CCND1
CCND2
CCND3
CCNE1
CD274
CD74
CD79A
CDC73
CDH11
CDK4
CDK6
CDK8
CDKN1B
CDKN2A
CDX2
CHEK1
CHEK2
CHIC2
CHN1
CIC
CIITA
CLP1
CLTC
CLTCL1
CNBP
CNTRL
COPB1
CREB1
CREB3L1
CREB3L2
CREBBP
CRKL
CRTC1
CRTC3
CSF1R
CSF3R
CTCF
CTLA4
CTNNA1
CTNNB1
CYLD
CYP2D6
DAXX
DDR2
DDX10
DDX5
DDX6
DEK
DICER1
DOT1L
EBF1
ECT2L
EGFR
EGFR_T790M
ELK4
ELL
EML4
EMSY
EP300
EPHA3
EPHA5
EPHB1
EPS15
ERBB2
ERBB3
ERBB4
ERC1
ERCC2
ERCC3
ERCC4
ERCC5
ERG
ESR1
ETV1
ETV5
ETV6
EWSR1
EXT1
EXT2
EZH2
EZR
FANCA
FANCC
FANCD2
FANCE
FANCG
FANCL
FAS
FBXO11
FBXW7
FCRL4
FGF10
FGF14
FGF19
FGF23
FGF3
FGF4
FGF6
FGFR1
FGFR1OP
FGFR2
FGFR3
FGFR4
FH
FHIT
FIP1L1
FLCN
FLI1
FLT1
FLT3
FLT4
FNBP1
FOXA1
FOXO1
FOXP1
FUBP1
FUS
GAS7
GATA3
GID4
GMPS
GNA13
GNAQ
GNAS
GOLGA5
GOPC
GPHN
GRIN2A
GSK3B
H3F3A
H3F3B
Her2/Neu
HERPUD1
HGF
HIP1
HMGA1
HMGA2
HNRNPA2B1
HOOK3
HSP90AA1
HSP90AB1
IDH1
IDH2
IGF1R
IKZF1
IL2
IL21R
IL6ST
IL7R
IRF4
ITK
JAK1
JAK2
JAK3
JAZF1
KDM5A
KDR
KEAP1
KIAA1549
KIF5B
KIT
KLHL6
KMT2A
KMT2C
KMT2D
KNL1
KRAS
KTN1
LCK
LCP1
LGR5
LHFPL6
LIFR
LPP
LRIG3
LRP1B
LYL1
MAF
MALT1
MAML2
MAP2K1
MAP2K2
MAP2K4
MAP3K1
MCL1
MDM2
MDM4
MDS2
MEF2B
MEN1
MET
MITF
MLF1
MLH1
MLLT1
MLLT10
MLLT3
MLLT6
MNX1
MRE11
MSH2
MSH6
MSI2
MTOR
MYB
MYC
MYCN
MYD88
MYH11
MYH9
NACA
NCKIPSD
NCOA1
NCOA2
NCOA4
NF1
NF2
NFE2L2
NFIB
NFKB2
NFKBIA
NIN
NOTCH2
NPM1
NR4A3
NSD1
NSD2
NSD3
NT5C2
NTRK1
NTRK2
NTRK3
NUP214
NUP93
NUP98
NUTM1
PALB2
PAX3
PAX5
PAX7
PBRM1
PBX1
PCM1
PCSK7
PDCD1
PDCD1LG2
PDGFB
PDGFRA
PDGFRB
PDK1
PER1
PICALM
PIK3CA
PIK3R1
PIK3R2
PIM1
PML
PMS2
POLE
POT1
POU2AF1
PPARG
PRCC
PRDM1
PRDM16
PRKAR1A
PRRX1
PSIP1
PTCH1
PTEN
PTPN11
PTPRC
RABEP1
RAC1
RAD50
RAD51
RAD51B
RAF1
RALGDS
RANBP17
RAP1GDS1
RARA
RB1
RBM15
REL
RET
RICTOR
RMI2
RNF43
ROS1
RPL22
RPL5
RPN1
RPTOR
RUNX1
RUNx1T1
SBDS
SDC4
SDHAF2
SDHB
SDHC
SDHD
SET
SETBP1
SETD2
SF3B1
SH2B3
SH3GL1
SLC34A2
SMAD2
SMAD4
SMARCB1
SMARCE1
SMO
SNX29
SOX10
SPECC1
SPEN
SRGAP3
SRSF2
SRSF3
SS18
SS18L1
STAT3
STAT4
STAT5B
STIL
STK11
SUFU
SUZ12
SYK
TAF15
TCF12
TCF3
TCF7L2
TET1
TET2
TFEB
TFG
TFRC
TGFBR2
TLX1
TNFAIP3
TNFRSF14
TNFRSF17
TOP1
TP53
TPM3
TPM4
TPR
TRAF7
TRIM26
TRIM27
TRIM33
TRIP11
TRRAP
TSC1
TSC2
TSHR
TTL
U2AF1
USP6
VEGFA
VEGFB
VTI1A
WDCP
WIF1
WISP3
WRN
WT1
WWTR1
XPA
XPC
XPO1
YWHAE
ZMYM2
ZNF217
ZNF331
ZNF384
ZNF521
ZNF703
EGFRvIII
MSI
cMET
Her2/Neu
del(1p/19q)
ALK_2p23
ROS1
TOP2A
EGFR
MET
AKT3
ALK
ARHGAP26
AXL
BRAF
BRD3
BRD4
EGFR
EGFRvIII
EGFRvIIIfa
ERG
ESR1
ETV1
ETV4
ETV5
ETV6
EWSR1
FGFR1
FGFR2
FGFR3
FGR
INSR
MAML2
MAST1
MAST2
MET
MSMB
MUSK
MYB
NOTCH1
NOTCH2
NRG1
NTRK1
NTRK2
NTRK3
NUMBL
NUTM1
PDGFRA
PDGFRB
PIK3CA
PKN1
PPARG
PRKCA
PRKCB
RAF1
RELA
RET
ROS1
RSPO2
RSPO3
TERT
TFE3
TFEB
THADA
TMPRSS2
EGFR
ALK
Androgen_Receptor
cMET
EGFR
ER
ERCC1
H3K36me3
Her2/Neu
MGMT
MLH1
MSH2
MSH6
PD-1
PD-L1_(22c3)
PD-L1_(SP142)	SP142 antibody
PGP
PMS2
PR
PTEN
RRM1
SPARC_Monoclonal
SPARC_Polyclonal
TLE3
TOP2A
TOPO1
TrkA/B/C
TS
TUBB3
43348
43349
43352
ABI1
ABL1
ABL2
ACKR3
ACSL3
ACSL6
ADGRA2
AFDN
AFF1
AFF3
AFF4
AKAP9
AKT1
AKT2
AKT3
ALDH2
ALK
AMER1
Androgen_Receptor
APC
AR
ARAF
ARFRP1
ARHGAP26
ARHGEF12
ARID1A
ARID2
ARNT
ASPSCR1
ASXL1
ATF1
ATIC
ATM
ATP1A1
ATP2B3
ATR
ATRX
AURKA
AURKB
AXIN1
AXL
BAP1
BARD1
BCL10
BCL11A
BCL11B
BCL2
BCL2L11
BCL2L2
BCL3
BCL6
BCL7A
BCL9
BCOR
BCORL1
BCR
BIRC3
BLM
BMPR1A
BRAF
BRCA1
BRCA2
BRD3
BRD4
BRIP1
BTG1
BTK
BUB1B
C15orf65
CACNA1D
CALR
CAMTA1
CANT1
CARD11
CARS
CASP8
CBFA2T3
CBFB
CBL
CBLB
CBLC
CCDC6
CCNB1IP1
CCND1
CCND2
CCND3
CCNE1
CD274
CD74
CD79A
CD79B
CDC73
CDH1
CDH11
CDK12
CDK4
CDK6
CDK8
CDKN1B
CDKN2A
CDKN2B
CDKN2C
CDX2
CEBPA
CHCHD7
CHEK1
CHEK2
CHIC2
CHN1
CIC
CIITA
c-KIT
CLP1
CLTC
CLTCL1
cMET
CNBP
CNOT3
CNTRL
COL1A1
COPB1
COX6C
CREB1
CREB3L1
CREB3L2
CREBBP
CRKL
CRLF2
CRTC1
CRTC3
CSF1R
CSF3R
CTCF
CTLA4
CTNNA1
CTNNB1
CYLD
CYP2D6
DAXX
DDB2
DDIT3
DDR2
DDX10
DDX5
DDX6
DEK
DICER1
DNM2
DNMT3A
DOT1L
EBF1
ECT2L
EGFR
EGFR_T790M
EGFR_Tertiary_Mutation
EIF4A2
ELF4
ELK4
ELL
ELN
EML4
EMSY
EP300
EPHA3
EPHA5
EPHB1
EPS15
ERBB2
ERBB3
ERBB4
ERC1
ERCC1
ERCC2
ERCC3
ERCC4
ERCC5
ERG
ESR1
ETV1
ETV4
ETV5
ETV6
EWSR1
EXT1
EXT2
EZH2
EZR
FAM46C
FANCA
FANCC
FANCD2
FANCE
FANCF
FANCG
FANCL
FAS
FBXO11
FBXW7
FCRL4
FEV
FGF10
FGF14
FGF19
FGF23
FGF3
FGF4
FGF6
FGFR1
FGFR1OP
FGFR2
FGFR3
FGFR4
FH
FHIT
FIP1L1
FLCN
FLI1
FLT1
FLT3
FLT4
FNBP1
FOXA1
FOXL2
FOXO1
FOXO3
FOXO4
FOXP1
FSTL3
FUBP1
FUS
GAS7
GATA1
GATA2
GATA3
GID4
GMPS
GNA11
GNA13
GNAQ
GNAS
GOLGA5
GOPC
GPC3
GPHN
GRIN2A
GSK3B
H3F3A
H3F3B
HERPUD1
HEY1
HGF
HIP1
HIST1H3B
HIST1H4I
HLF
HMGA1
HMGA2
HMGN2P46
HNF1A
HNRNPA2B1
HOOK3
HOXA11
HOXA13
HOXA9
HOXC11
HOXC13
HOXD11
HOXD13
HRAS
HSP90AA1
HSP90AB1
IDH1
IDH2
IGF1R
IKBKE
IKZF1
IL2
IL21R
IL6ST
IL7R
INHBA
IRF4
IRS2
ITK
JAK1
JAK2
JAK3
JAZF1
JUN
KAT6A
KAT6B
KCNJ5
KDM5A
KDM5C
KDM6A
KDR
KDSR
KEAP1
KIAA1549
KIF5B
KIT
KLF4
KLHL6
KLK2
KMT2A
KMT2C
KMT2D
KNL1
KRAS
KTN1
LASP1
LCK
LCP1
LGR5
LHFPL6
LIFR
LMO1
LMO2
LPP
LRIG3
LRP1B
LYL1
MAF
MAFB
MALT1
MAML2
MAP2K1
MAP2K2
MAP2K4
MAP3K1
MAX
MCL1
MDM2
MDM4
MDS2
MECOM
MED12
MEF2B
MEN1
MET
MITF
MKL1
MLF1
MLH1
MLLT1
MLLT10
MLLT11
MLLT3
MLLT6
MN1
MNX1
MPL
MRE11
MSH2
MSH6
MSI
MSI2
MSN
MTCP1
MTOR
MUC1
MUTYH
MYB
MYC
MYCL
MYCN
MYD88
MYH11
MYH9
NACA
NBN
NCKIPSD
NCOA1
NCOA2
NCOA4
NDRG1
NF1
NF2
NFE2L2
NFIB
NFKB2
NFKBIA
NIN
NKX2-1
NONO
NOTCH1
NOTCH2
NPM1
NR4A3
NRAS
NSD1
NSD2
NSD3
NT5C2
NTRK1
NTRK2
NTRK3
NUMA1
NUP214
NUP93
NUP98
NUTM1
NUTM2B
OLIG2
OMD
P2RY8
PAFAH1B2
PAK3
PALB2
PATZ1
PAX3
PAX5
PAX7
PAX8
PBRM1
PBX1
PCM1
PCSK7
PDCD1
PDCD1LG2
PDE4DIP
PDGFB
PDGFRA
PDGFRB
PDK1
PER1
PHF6
PHOX2B
PICALM
PIK3CA
PIK3CG
PIK3R1
PIK3R2
PIM1
PLAG1
PML
PMS1
PMS2
POLE
POT1
POU2AF1
POU5F1
PPARG
PPP2R1A
PRCC
PRDM1
PRDM16
PRF1
PRKAR1A
PRKDC
PRRX1
PSIP1
PTCH1
PTEN
PTPN11
PTPRC
RABEP1
RAC1
RAD21
RAD50
RAD51
RAD51B
RAF1
RALGDS
RANBP17
RAP1GDS1
RARA
RB1
RBM15
RECQL4
REL
RET
RHOH
RICTOR
RMI2
RNF213
RNF43
ROS1
RPL10
RPL22
RPL5
RPN1
RPTOR
RUNX1
RUNx1T1
SBDS
SDC4
SDHAF2
SDHB
SDHC
SDHD
SET
SETBP1
SETD2
SF3B1
SFPQ
SH2B3
SH3GL1
SLC34A2
SLC45A3
SMAD2
SMAD4
SMARCA4
SMARCB1
SMARCE1
SMO
SNX29
SOCS1
SOX10
SOX2
SPECC1
SPEN
SPOP
SRC
SRGAP3
SRSF2
SRSF3
SS18
SS18L1
SSX1
STAG2
STAT3
STAT4
STAT5B
STIL
STK11
SUFU
SUZ12
SYK
T.M.L.
TAF15
TAL1
TAL2
TBL1XR1
TCEA1
TCF12
TCF3
TCF7L2
TCL1A
TERT
TET1
TET2
TFE3
TFEB
TFG
TFPT
TFRC
TGFBR2
THRAP3
TLX1
TLX3
TMPRSS2
TNFAIP3
TNFRSF14
TNFRSF17
TOP1
TP53
TPM3
TPM4
TPR
TRAF7
TRIM26
TRIM27
TRIM33
TRIP11
TRRAP
TSC1
TSC2
TSHR
TTL
U2AF1
UBR5
USP6
VEGFA
VEGFB
VHL
VTI1A
WAS
WDCP
WIF1
WISP3
WRN
WT1
WWTR1
XPA
XPC
XPO1
YWHAE
ZBTB16
ZMYM2
ZNF217
ZNF331
ZNF384
ZNF521
ZNF703
ZRSR2
MGMT
EGFR
EGFR_EX20ins
EGFR_T790M
BRAF
BRCA1
BRCA2
c-KIT
IDH2
KRAS
KRAS_G13D
NRAS
PIK3CA
-----------
to check
-----------
ffa
EGFRvIII-ffa
fa
EGFR-fa
MSI-fa
EGFR_EX20ins	EGFR exon 20 insertion
FISH
del(1p/19q)	codeletion 1p, 19q
ALK_2p23	ALK 2p23 rearrangement
ROS1	ROS1 fusion (via break-apart FISH)
TOP2A	TOP2A copy-number variations
